# Supplementary material for: Chromatin conformation and transcriptional activity are permissive regulators of DNA replication initiation in Drosophila
Source: HighWire-hosted journal article supplement (doi:10.1101/gr.239913.118), 2018-10-02
Supplement: Supplemental_File_S1.xlsx [file Supplemental_File_S1.xlsx]

## Sheet: Armstrong_File_S1
File_S1. Replication timing at 100kb windows between H3K9R and control across the genome.
chromosome	start	stop	RT	Adj_Pvalue
chr3R	1980000	2080000	0.339694	8.33e-05
chr3R	2040000	2140000	0.280527	8.33e-05
chr3R	1990000	2090000	0.38132	8.33e-05
chr3R	2030000	2130000	0.300992	8.33e-05
chr3R	2000000	2100000	0.359057	8.33e-05
chr3R	2080000	2180000	0.233818	8.33e-05
chr3R	2090000	2190000	0.230802	8.33e-05
chr3R	2070000	2170000	0.262664	8.33e-05
chr3R	2060000	2160000	0.285355	8.33e-05
chr3R	2050000	2150000	0.275455	8.33e-05
chr3R	2100000	2200000	0.231509	0.00015225
chr3R	2110000	2210000	0.248977	0.000181977
chr3L	26210000	26310000	-0.224283	0.000214222
chrX_DS483818v1_random	0	4917	0.510684	0.000319103
chr3R	2690000	2790000	0.262921	0.000319103
chr3R	2010000	2110000	0.301201	0.000319103
chr3L	26230000	26330000	-0.177632	0.000426079
chr3L	26190000	26290000	-0.249129	0.000426079
chr3R	2020000	2120000	0.294171	0.000604461
chrUn_DS483949v1	0	3593	-0.401621	0.00061899
chr3L	27740000	27840000	0.247058	0.00061899
chr3L	26200000	26300000	-0.221842	0.00061899
chr3R	6160000	6260000	-0.153933	0.00061899
chrUn_CP007079v1	0	23238	-0.344384	0.00061899
chrUn_DS484004v1	0	3277	-0.426946	0.000633791
chr3R	2590000	2690000	0.165244	0.000646431
chr3R	2140000	2240000	0.205225	0.000646431
chr3R	2120000	2220000	0.228306	0.000646431
chr3L	26240000	26340000	-0.160355	0.000792047
chrUn_DS485249v1	0	1192	0.280123	0.000792047
chrX	20150000	20250000	-0.191132	0.000792047
chr3L	23750000	23850000	-0.187958	0.000792047
chr3R	2150000	2250000	0.220854	0.000792047
chr3L	26220000	26320000	-0.190177	0.000792047
chrX	22330000	22430000	0.182915	0.000792047
chr3L	23760000	23860000	-0.157847	0.000792047
chr3R	2650000	2750000	0.240433	0.000792047
chr3R	2680000	2780000	0.315433	0.000792047
chr2L	23240000	23340000	0.171465	0.000792047
chr3R	6180000	6280000	-0.143522	0.000792047
chr3R	6170000	6270000	-0.15708	0.000876713
chr3L	13620000	13720000	-0.155987	0.000876713
chr2L	15970000	16070000	-0.140254	0.000876713
chr3R	2700000	2800000	0.229214	0.00087827
chrX	21990000	22090000	0.332171	0.00087827
chrX	20160000	20260000	-0.20206	0.00087827
chr3L	23730000	23830000	-0.192983	0.00087827
chrX_DS484187v1_random	0	2671	0.419865	0.000907179
chr3L	26660000	26760000	0.178478	0.000907179
chr3R	2130000	2230000	0.212666	0.000907179
chr3R	6190000	6290000	-0.142024	0.00101803
chr3L	23740000	23840000	-0.188465	0.00105906
chrX	21980000	22080000	0.254046	0.00107936
chr3L	26140000	26240000	-0.214327	0.00109954
chr3L	26250000	26350000	-0.169464	0.00114115
chrX	2710000	2810000	-0.224728	0.00114669
chr3L	5000000	5100000	-0.133853	0.00114669
chrX	21920000	22020000	0.148439	0.00115431
chr3L	27760000	27860000	0.194857	0.00116497
chr3R	590000	690000	0.160957	0.00122399
chr2L	6200000	6300000	-0.134083	0.00122399
chrX	2720000	2820000	-0.227316	0.00122399
chr2R	3710000	3810000	0.248448	0.00122399
chrX	2740000	2840000	-0.254547	0.0012817
chr3L	4840000	4940000	-0.130863	0.00129798
chrX	21970000	22070000	0.210664	0.00129798
chrX	2750000	2850000	-0.24558	0.00132811
chr3L	26160000	26260000	-0.258592	0.0013483
chrX	2780000	2880000	-0.280404	0.0013483
chr3R	2660000	2760000	0.224091	0.0013483
chr2R	3720000	3820000	0.184726	0.0013483
chr4	180000	280000	0.14232	0.0013483
chr3R	27410000	27510000	-0.15884	0.0013483
chr2R	3730000	3830000	0.188228	0.0013483
chr3L	5010000	5110000	-0.152608	0.0013483
chr3L	26670000	26770000	0.182458	0.0013483
chr3L	5040000	5140000	-0.132121	0.0013483
chrX	21940000	22040000	0.169414	0.0013483
chrX_DS483655v1_random	0	13549	0.361581	0.0013483
chrX	22320000	22420000	0.172628	0.0013483
chr3L	5030000	5130000	-0.182628	0.0013483
chrX	2730000	2830000	-0.234098	0.0013483
chrX	2760000	2860000	-0.245201	0.0013483
chr2R	3940000	4040000	0.150883	0.0013483
chr3R	2600000	2700000	0.14433	0.0013483
chr3R	600000	700000	0.155118	0.0013483
chr2L	23320000	23420000	0.149614	0.0013483
chrX	2700000	2800000	-0.218231	0.00135194
chrX_DS483885v1_random	0	4085	-0.218279	0.00135194
chr3L	27730000	27830000	0.204695	0.00138764
chr3L	25690000	25790000	0.134112	0.00143779
chrX_DS483655v1_random	10000	13549	0.338011	0.00143842
chr3R	2640000	2740000	0.199419	0.00143842
chr3L	23720000	23820000	-0.162053	0.00143842
chr3L	26260000	26360000	-0.154916	0.00143842
chr3R	2710000	2810000	0.202921	0.00143842
chr3L	26700000	26800000	0.198152	0.00143842
chr2L	15950000	16050000	-0.130108	0.00143842
chrX	2790000	2890000	-0.278228	0.00143842
chr3R	1950000	2050000	0.214451	0.00143842
chr2L	15960000	16060000	-0.1263	0.00143842
chrX	2770000	2870000	-0.252426	0.00143842
chr2L	23250000	23350000	0.163001	0.00143842
chr3R	620000	720000	0.187318	0.00143842
chr2L	23330000	23430000	0.145762	0.00143842
chr2R	25280000	25286936	-0.225854	0.00145042
chr2L	23260000	23360000	0.155062	0.00147876
chr2R	4020000	4120000	0.135126	0.00147876
chr3L	26130000	26230000	-0.16592	0.00148697
chrX_DS484057v1_random	0	3076	-0.400248	0.00149505
chr3L	5050000	5150000	-0.120887	0.00151372
chr3R	1940000	2040000	0.223083	0.00151372
chr2L	23290000	23390000	0.156487	0.00152145
chr2R	6340000	6440000	-0.181056	0.00152145
chr4	170000	270000	0.128126	0.00155575
chr3R	2190000	2290000	0.188639	0.00155614
chr3L	13660000	13760000	-0.124568	0.00156053
chr3L	27750000	27850000	0.287683	0.00156632
chr3R	2610000	2710000	0.138795	0.00156887
chr3R	27390000	27490000	-0.184308	0.00156887
chrX	22360000	22460000	0.133259	0.00158541
chr3R	27400000	27500000	-0.162384	0.00158541
chr3L	26720000	26820000	0.172855	0.00158541
chr3R	2670000	2770000	0.297113	0.00158541
chr2L	6210000	6310000	-0.141274	0.00158541
chrX_DS485141v1_random	0	1228	0.390358	0.00162424
chrX_DS484185v1_random	0	2686	0.319106	0.00164533
chrX	21950000	22050000	0.195251	0.00175297
chr2R	9150000	9250000	-0.118772	0.00176215
chr3L	23770000	23870000	-0.14134	0.00176215
chr4	160000	260000	0.120169	0.00177845
chr3L	5020000	5120000	-0.151481	0.00177845
chr3R	630000	730000	0.176585	0.00177845
chrX	22310000	22410000	0.150241	0.00177845
chr3L	26270000	26370000	-0.165192	0.00177845
chr2L	6230000	6330000	-0.156914	0.00177845
chrX_DS483648v1_random	0	13940	-0.364727	0.00177845
chr3R	2200000	2300000	0.165271	0.00177845
chr3R	28860000	28960000	-0.135278	0.00179516
chr3L	25700000	25800000	0.153725	0.00179516
chr3L	4990000	5090000	-0.125141	0.00179982
chr3R	2180000	2280000	0.208819	0.00179982
chr3R	2210000	2310000	0.152994	0.00179982
chr3L	23530000	23630000	-0.130022	0.00179982
chr2L	23280000	23380000	0.143695	0.00186276
chr3L	13630000	13730000	-0.130221	0.00190883
chr3L	23020000	23120000	-0.108968	0.00190883
chr2L	16000000	16100000	-0.144353	0.00190883
chr3R	3060000	3160000	0.19971	0.00192362
chr3L	4980000	5080000	-0.118211	0.00192799
chr3L	26650000	26750000	0.17989	0.00194021
chrX	22000000	22100000	0.291679	0.00194021
chr2R	20790000	20890000	-0.139335	0.00201661
chr2L	6680000	6780000	-0.108644	0.00204297
chr2R	3960000	4060000	0.135201	0.00208273
chrX	22010000	22110000	0.286681	0.00215518
chr3L	24960000	25060000	0.123007	0.00215518
chr2R	3700000	3800000	0.229023	0.00221392
chr2L	23180000	23280000	0.140617	0.00221392
chr2R	9160000	9260000	-0.109732	0.00221711
chr2R	3470000	3570000	0.126398	0.00221874
chr2L	23340000	23440000	0.124755	0.00221874
chr3L	11280000	11380000	0.10931	0.00221874
chr3L	26710000	26810000	0.181579	0.00221874
chr3R	27380000	27480000	-0.164766	0.00230533
chr3R	2630000	2730000	0.15187	0.0023782
chr3R	2220000	2320000	0.136887	0.00238473
chr3L	25680000	25780000	0.124747	0.00238473
chr3L	26690000	26790000	0.170282	0.00251323
chr2R	23520000	23620000	-0.11991	0.00256918
chr2R	3760000	3860000	0.158457	0.00258392
chr3L	570000	670000	0.117009	0.00258392
chr2L	6710000	6810000	-0.115983	0.00259156
chr3R	27430000	27530000	-0.133006	0.00262804
chr3R	2160000	2260000	0.201882	0.00266869
chr3R	6150000	6250000	-0.108801	0.002794
chrX	22370000	22470000	0.123138	0.002794
chr4	190000	290000	0.124587	0.00280873
chr2R	3950000	4050000	0.132145	0.0028312
chrX	20140000	20240000	-0.150642	0.00285656
chr2R	3970000	4070000	0.133259	0.00285833
chr3R	1710000	1810000	0.12276	0.00290779
chr3R	6220000	6320000	-0.110695	0.00291521
chr3R	640000	740000	0.211231	0.00291521
chr2R	25100000	25200000	-0.114737	0.00292517
chr2R	9140000	9240000	-0.106414	0.00293763
chr2L	15940000	16040000	-0.124454	0.00300487
chr3L	26680000	26780000	0.165053	0.00302003
chr3R	580000	680000	0.129775	0.00304979
chr3L	26180000	26280000	-0.188895	0.0030995
chr3L	13650000	13750000	-0.124274	0.0030995
chr3R	3290000	3390000	0.120668	0.0030995
chr3R	6210000	6310000	-0.115516	0.0031214
chr2R	3930000	4030000	0.126478	0.0031214
chrX	21930000	22030000	0.138613	0.0031214
chr3L	24950000	25050000	0.116605	0.00316215
chr2L	6700000	6800000	-0.104879	0.00316215
chr2L	23300000	23400000	0.148972	0.00316215
chr3L	4830000	4930000	-0.104794	0.00316215
chrX	15720000	15820000	0.132533	0.00321226
chr3R	11890000	11990000	0.101103	0.00322199
chr2R	5560000	5660000	0.127921	0.00332614
chr2L	22400000	22500000	0.107108	0.00332614
chr3R	1930000	2030000	0.232607	0.00332614
chrX	22350000	22450000	0.120212	0.00332614
chr2L	6720000	6820000	-0.11376	0.00334561
chr3L	24990000	25090000	0.124896	0.00334561
chr2L	16040000	16140000	-0.133549	0.00334561
chrX	20690000	20790000	-0.158006	0.00338352
chrY	1330000	1430000	0.186593	0.00351659
chr3L	4850000	4950000	-0.106243	0.00351659
chr2R	3750000	3850000	0.15942	0.00361203
chr3L	24900000	25000000	0.119018	0.00361203
chr2R	10160000	10260000	-0.145802	0.00361203
chr3R	2580000	2680000	0.127603	0.00365057
chr2L	15980000	16080000	-0.11205	0.00365057
chr3L	11270000	11370000	0.106254	0.00366278
chr3L	27060000	27160000	-0.0991367	0.00366278
chr3R	22010000	22110000	-0.106522	0.00366471
chr2R	3690000	3790000	0.256009	0.00366786
chr2R	3980000	4080000	0.129173	0.00366786
chr2R	25090000	25190000	-0.115131	0.00372944
chr3L	13600000	13700000	-0.131014	0.00372944
chr3R	22800000	22900000	-0.127331	0.00372944
chr4	200000	300000	0.120923	0.00372944
chr2L	20050000	20150000	-0.108997	0.0037471
chr3L	24830000	24930000	0.111261	0.00374716
chr3L	24980000	25080000	0.113584	0.00375169
chrUn_CP007091v1	0	20763	0.189696	0.00375169
chr3R	6610000	6710000	-0.101735	0.00375169
chr2L	22500000	22600000	-0.0952054	0.0037533
chr3L	23700000	23800000	-0.141591	0.0037533
chr2L	11460000	11560000	-0.110477	0.0037533
chr2R	3990000	4090000	0.129623	0.0037533
chr2L	20070000	20170000	-0.11643	0.0037533
chrX	21770000	21870000	0.155423	0.00376869
chr2R	3350000	3450000	0.165237	0.00377861
chr3R	6580000	6680000	-0.104944	0.00377861
chr2R	3190000	3290000	0.108196	0.00378032
chr3L	25670000	25770000	0.105104	0.00378032
chr2R	3680000	3780000	0.206858	0.00388965
chr2R	9170000	9270000	-0.101817	0.00401802
chr3L	23030000	23130000	-0.09963	0.0040214
chr2L	15990000	16090000	-0.11897	0.00409488
chr3R	22840000	22940000	-0.111709	0.00409488
chr2L	20260000	20360000	-0.11498	0.0042417
chr2L	6690000	6790000	-0.09741	0.0042417
chr3R	17250000	17350000	-0.125618	0.0042417
chr2R	23510000	23610000	-0.115605	0.00427616
chr2R	250000	350000	0.0935913	0.00430403
chrX	21960000	22060000	0.180621	0.00430403
chr2L	6190000	6290000	-0.0989521	0.00430403
chrX	22160000	22260000	0.262383	0.00430403
chrX	20190000	20290000	-0.0999224	0.00432467
chr3L	23010000	23110000	-0.0981798	0.00435464
chr2R	840000	940000	-0.103904	0.00437736
chrX	15710000	15810000	0.120017	0.00441238
chrX_CP007103v1_random	30000	33320	-0.250563	0.00441238
chr3R	21790000	21890000	0.100055	0.00441238
chr3R	6620000	6720000	-0.110571	0.00441238
chr2L	23270000	23370000	0.123644	0.00442973
chr3L	26640000	26740000	0.153143	0.00457031
chr2R	3480000	3580000	0.119871	0.00457031
chr2R	10200000	10300000	-0.110905	0.00457031
chr3R	6200000	6300000	-0.102764	0.00459306
chr3R	21720000	21820000	0.102853	0.00466506
chr3R	6140000	6240000	-0.106102	0.00466952
chr3L	23710000	23810000	-0.136654	0.00475212
chr3L	580000	680000	0.111793	0.0047578
chr2R	240000	340000	0.0967904	0.0047578
chr3R	1920000	2020000	0.217595	0.00477105
chr3R	28200000	28300000	-0.106565	0.00480737
chr2R	20780000	20880000	-0.120455	0.00483239
chr2R	3740000	3840000	0.17843	0.00483239
chr3L	26150000	26250000	-0.164582	0.00483239
chr2R	730000	830000	0.187459	0.00483239
chr2L	22520000	22620000	-0.0940513	0.00483239
chr3R	16710000	16810000	-0.135904	0.00486153
chr3R	21800000	21900000	0.0977046	0.00487702
chr3L	13610000	13710000	-0.120699	0.00501622
chr2L	20160000	20260000	0.115636	0.00501622
chr2R	260000	360000	0.0920674	0.00501622
chr3L	23040000	23140000	-0.0965063	0.00502027
chr3R	28880000	28980000	-0.095679	0.00502027
chr3L	27020000	27120000	-0.0963275	0.00503161
chr3L	26170000	26270000	-0.218505	0.00507058
chr3R	6590000	6690000	-0.099136	0.00507058
chr2L	22510000	22610000	-0.0901707	0.00507553
chr2L	23310000	23410000	0.133534	0.00512312
chr3L	23050000	23150000	-0.0939864	0.00521662
chrUn_DS483906v1	0	3924	0.351561	0.00521662
chr2R	1120000	1220000	-0.105962	0.00525384
chr3L	20830000	20930000	0.0912428	0.00525384
chr3L	13670000	13770000	-0.107993	0.00527974
chr3R	28870000	28970000	-0.0972561	0.00527974
chr3L	4820000	4920000	-0.0891952	0.00529298
chr3R	150000	250000	-0.120487	0.00531379
chr2R	23530000	23630000	-0.117543	0.00531498
chr2L	22270000	22370000	0.121416	0.00535222
chr3R	110000	210000	-0.0900732	0.00535222
chr2L	20150000	20250000	0.103965	0.00535634
chr2R	9190000	9290000	-0.103618	0.00537729
chr2L	20060000	20160000	-0.113512	0.00548198
chrX	22170000	22270000	0.221357	0.0055372
chrX	21720000	21820000	0.140144	0.0055372
chr2L	6220000	6320000	-0.129493	0.0055372
chr3R	3070000	3170000	0.190553	0.0055372
chr3R	17240000	17340000	-0.130827	0.0055711
chr3L	25710000	25810000	0.122617	0.0055711
chrX	20220000	20320000	-0.0947414	0.0055711
chrX	22860000	22960000	-0.109749	0.0055711
chr2R	10180000	10280000	-0.107909	0.0055711
chr3L	13640000	13740000	-0.0969615	0.0055711
chrX	20200000	20300000	-0.095516	0.00563229
chr3L	26280000	26380000	-0.142824	0.00563229
chrX	22410000	22510000	0.117427	0.00563708
chr3L	24880000	24980000	0.105638	0.00563708
chrX	20680000	20780000	-0.147889	0.00567504
chr3R	14100000	14200000	0.103452	0.00567504
chr4	230000	330000	0.112178	0.00567504
chr2L	1910000	2010000	-0.100621	0.00567504
chr2R	1770000	1870000	-0.112782	0.00568635
chrX	22400000	22500000	0.116812	0.00568635
chr3R	2620000	2720000	0.116031	0.00568635
chr2R	9180000	9280000	-0.096097	0.00576733
chr4	220000	320000	0.118378	0.00585132
chr2L	22260000	22360000	0.117231	0.00585132
chr3R	1310000	1410000	0.130666	0.00585132
chr3R	14070000	14170000	0.109353	0.00585132
chr2R	4680000	4780000	0.0975847	0.00585132
chrX_DS483905v1_random	0	3926	-0.265388	0.00585132
chr2R	1940000	2040000	-0.128005	0.00585132
chr2R	4040000	4140000	0.123631	0.00585132
chr3R	1960000	2060000	0.216492	0.00585132
chrX	20210000	20310000	-0.0942086	0.00585663
chr2R	23500000	23600000	-0.102169	0.00585663
chr3L	19100000	19200000	0.094591	0.00585663
chr3R	2570000	2670000	0.110973	0.00585663
chr2L	21960000	22060000	-0.0946517	0.00588237
chr2R	3490000	3590000	0.107567	0.00600573
chr2R	3240000	3340000	0.162532	0.00600573
chr2R	23550000	23650000	-0.112283	0.00600573
chr2R	10210000	10310000	-0.100833	0.00607671
chr3L	20840000	20940000	0.0896762	0.00607671
chrX	22340000	22440000	0.109202	0.00609748
chr3L	27700000	27800000	0.125897	0.00611094
chr2R	560000	660000	-0.100163	0.00611094
chr2L	4250000	4350000	-0.0935645	0.00611094
chrX_DS485647v1_random	0	1086	0.342796	0.00611094
chr2L	6740000	6840000	-0.10959	0.00614432
chrX	22850000	22950000	-0.114665	0.00617476
chr3R	610000	710000	0.128204	0.00617476
chr2R	1780000	1880000	-0.128923	0.00618711
chr3R	2170000	2270000	0.192535	0.00620417
chr3R	22810000	22910000	-0.11056	0.00625181
chr3R	22820000	22920000	-0.106372	0.00626567
chr3L	5070000	5170000	-0.0988636	0.00626567
chr2L	22280000	22380000	0.131107	0.00629831
chr3R	22450000	22550000	-0.0982422	0.00630067
chrX	20670000	20770000	-0.132057	0.00630067
chrX	20710000	20810000	-0.126564	0.00630067
chrX	3130000	3230000	-0.154483	0.0063409
chr3L	27690000	27790000	0.123142	0.00637725
chr2L	12180000	12280000	-0.112609	0.00637725
chr3R	2720000	2820000	0.150868	0.00637725
chr3R	28850000	28950000	-0.10502	0.00642453
chr2R	6330000	6430000	-0.117791	0.00643459
chr2L	16080000	16180000	-0.145409	0.00643459
chr3L	20810000	20910000	0.0931394	0.00643459
chr3R	710000	810000	0.125334	0.00645254
chr3L	390000	490000	-0.0969734	0.00648796
chr3R	27420000	27520000	-0.120706	0.00655474
chrX	22250000	22350000	0.20694	0.00656155
chr2L	22530000	22630000	-0.0909855	0.00661656
chr2L	6670000	6770000	-0.0853303	0.00671558
chr2R	4660000	4760000	0.0957272	0.00672572
chr3L	5060000	5160000	-0.101477	0.00672572
chr3L	7100000	7200000	-0.100698	0.00672572
chr3R	9900000	10000000	-0.0859063	0.00678837
chr4	1280000	1348131	-0.124587	0.00678837
chr2L	6730000	6830000	-0.101936	0.00678837
chr2R	1950000	2050000	-0.117189	0.00678837
chr2R	25080000	25180000	-0.111108	0.006796
chr2L	23370000	23470000	0.111982	0.00682586
chr2R	4670000	4770000	0.0943204	0.00686493
chr3L	27040000	27140000	-0.0951421	0.00686493
chr3R	12500000	12600000	-0.0971536	0.00686932
chr3R	1890000	1990000	0.170643	0.00691873
chr3R	17230000	17330000	-0.129597	0.00691873
chr3R	9910000	10010000	-0.0926277	0.00691873
chr2R	25110000	25210000	-0.0937713	0.00691873
chr3R	1970000	2070000	0.267103	0.00691873
chrX	5700000	5800000	-0.117314	0.00691873
chr3R	21780000	21880000	0.0947026	0.00701419
chr3L	25720000	25820000	0.112898	0.00701419
chr3R	2410000	2510000	0.11261	0.00704157
chr3L	15130000	15230000	0.0921597	0.00704157
chr3R	24390000	24490000	-0.0875935	0.00705374
chrX	22380000	22480000	0.116127	0.00705374
chr2L	16020000	16120000	-0.130652	0.00706533
chrX	22290000	22390000	0.184351	0.00706533
chrX	3150000	3250000	-0.116078	0.00707076
chr3R	3910000	4010000	0.158405	0.00707076
chrX	22420000	22520000	0.106269	0.00707695
chrX	21760000	21860000	0.138242	0.00707873
chr2R	23490000	23590000	-0.103535	0.00720618
chr3L	13590000	13690000	-0.112997	0.00720719
chr3R	1300000	1400000	0.114854	0.00720719
chr4	210000	310000	0.110548	0.00720719
chr3R	9870000	9970000	-0.0897065	0.00722955
chr2L	16010000	16110000	-0.125341	0.00722955
chr4	1290000	1348131	-0.130351	0.00724824
chrX	22180000	22280000	0.214871	0.00726569
chr3L	26430000	26530000	0.121046	0.00726569
chrX	11600000	11700000	0.1019	0.00726569
chr3R	1900000	2000000	0.176212	0.00726569
chr2L	18150000	18250000	0.0940093	0.00726569
chr2R	2600000	2700000	-0.0952238	0.00726569
chrX	15230000	15330000	-0.104327	0.00726569
chr2L	17860000	17960000	-0.0899291	0.00726569
chrX	22390000	22490000	0.116929	0.00734599
chr2L	3550000	3650000	-0.0847557	0.00734599
chr3R	17270000	17370000	-0.0898485	0.00734599
chr3L	25010000	25110000	0.112703	0.00734599
chr2L	22290000	22390000	0.124634	0.00736736
chr2L	16030000	16130000	-0.123443	0.00736736
chr2R	23540000	23640000	-0.113533	0.00737956
chr2L	4240000	4340000	-0.0860988	0.00740027
chr2R	3310000	3410000	0.201117	0.00740027
chr3R	1910000	2010000	0.189628	0.00742934
chr2L	10860000	10960000	0.0922737	0.00743661
chr2R	7970000	8070000	-0.0891832	0.00747405
chr3L	13690000	13790000	-0.109616	0.00747405
chr3R	16700000	16800000	-0.0945156	0.00747405
chr3L	13580000	13680000	-0.10638	0.00748237
chr2L	15930000	16030000	-0.137929	0.00748237
chr3R	12640000	12740000	-0.0931574	0.00748237
chr3L	22520000	22620000	-0.0891188	0.00749211
chr3L	23670000	23770000	-0.114716	0.00749211
chr2R	3340000	3440000	0.166566	0.00752165
chr2L	6660000	6760000	-0.0821046	0.00752165
chr3R	25120000	25220000	-0.0904225	0.00752846
chr2R	570000	670000	-0.0908241	0.00758721
chrX	5690000	5790000	-0.121938	0.00762596
chr2R	850000	950000	-0.0885508	0.00762596
chrX	13770000	13870000	0.104143	0.00766189
chr2R	23560000	23660000	-0.0940431	0.00791129
chr2L	11450000	11550000	-0.0925742	0.00792297
chr2L	1930000	2030000	-0.0934332	0.00792297
chrX	2830000	2930000	-0.118897	0.00792297
chrX	110000	210000	0.0926407	0.00795952
chrX	15750000	15850000	0.114696	0.00795952
chr2L	16050000	16150000	-0.129861	0.00796833
chr3R	12490000	12590000	-0.0934577	0.00805727
chrX	22870000	22970000	-0.0869523	0.00808414
chr3L	17200000	17300000	-0.0974004	0.00830012
chr2R	550000	650000	-0.0956606	0.00830012
chr2R	20800000	20900000	-0.112568	0.00830012
chr3R	3320000	3420000	0.0964634	0.00830012
chr4	900000	1000000	0.0848937	0.00830012
chr2R	23480000	23580000	-0.0930966	0.0083265
chr3R	28090000	28190000	-0.0879612	0.0083265
chr2R	3230000	3330000	0.13166	0.0083265
chr2L	11470000	11570000	-0.105312	0.0083265
chr2R	3910000	4010000	0.130845	0.0083493
chr3R	650000	750000	0.197852	0.0083493
chrX	5000000	5100000	0.083995	0.00846799
chr3R	20360000	20460000	-0.0963956	0.00846799
chr2L	1900000	2000000	-0.0936051	0.00850295
chrX	13780000	13880000	0.100049	0.00850295
chr3R	3300000	3400000	0.0914262	0.00850295
chrX	15760000	15860000	0.0869743	0.00850295
chr3L	26730000	26830000	0.14293	0.00850295
chr2R	270000	370000	0.0811896	0.00850295
chr3L	13700000	13800000	-0.104079	0.00850295
chr2R	13540000	13640000	-0.0990508	0.00850295
chr3L	24940000	25040000	0.0978744	0.00850295
chr3L	23690000	23790000	-0.111661	0.00850295
chr3R	22030000	22130000	-0.0814114	0.00850295
chrX	21730000	21830000	0.131741	0.00850295
chr3R	21760000	21860000	0.105511	0.00850295
chr3L	24970000	25070000	0.106523	0.00850567
chr2R	25050000	25150000	-0.0892095	0.00850567
chr2L	23350000	23450000	0.0981616	0.00852364
chr3R	17280000	17380000	-0.0891639	0.00855196
chr2R	280000	380000	0.0907127	0.00855196
chr2R	3360000	3460000	0.119644	0.00855196
chr2L	4260000	4360000	-0.086392	0.00856428
chr3L	18140000	18240000	0.0885121	0.00857983
chr3L	15590000	15690000	0.0830571	0.00858238
chr3R	5720000	5820000	-0.100543	0.00858238
chr3L	23520000	23620000	-0.104639	0.00858238
chrX	100000	200000	0.0910106	0.00858238
chr3R	11900000	12000000	0.0793719	0.00859032
chr4	940000	1040000	0.0910642	0.00860692
chr4	880000	980000	0.0971417	0.00860692
chr3L	4810000	4910000	-0.0856639	0.00860692
chr2L	12140000	12240000	-0.0966358	0.00860692
chr3R	9880000	9980000	-0.085134	0.00860692
chr2L	3560000	3660000	-0.0855137	0.00860692
chr2L	6240000	6340000	-0.128803	0.00860692
chr4	890000	990000	0.0852504	0.00860692
chr4	250000	350000	0.0921666	0.00862688
chr2L	22550000	22650000	-0.109217	0.00862688
chrX	11590000	11690000	0.0948896	0.00862688
chr3R	16740000	16840000	-0.0867775	0.00862688
chr2R	23570000	23670000	-0.0900911	0.00862688
chr3R	17290000	17390000	-0.0877439	0.00862688
chrX	15730000	15830000	0.110579	0.00862688
chr3R	5070000	5170000	0.0889746	0.00862688
chr3L	5640000	5740000	-0.0869704	0.00863695
chrX	11580000	11680000	0.101125	0.0086513
chr2R	13550000	13650000	-0.105413	0.0086513
chr2L	12170000	12270000	-0.11601	0.00865362
chr3R	21710000	21810000	0.0948313	0.00865362
chr4	150000	250000	0.0877466	0.00868261
chr3R	25130000	25230000	-0.0835591	0.00868261
chr3L	18150000	18250000	0.0976067	0.00869763
chr2R	3320000	3420000	0.191613	0.00871432
chr2R	21710000	21810000	0.0820078	0.00871432
chr2L	20270000	20370000	-0.0964634	0.00871432
chr3R	12760000	12860000	0.0958354	0.00872965
chr2L	5600000	5700000	-0.0856654	0.00872965
chr3R	1880000	1980000	0.18141	0.00872965
chrX	90000	190000	0.0956583	0.00872965
chr2L	11480000	11580000	-0.107589	0.00887666
chrX	15270000	15370000	-0.0933886	0.00887666
chrX	15260000	15360000	-0.0957414	0.00887666
chr3R	28130000	28230000	-0.110673	0.00905013
chr2R	830000	930000	-0.101635	0.00910452
chr3R	5700000	5800000	-0.0870351	0.0091151
chr2L	12190000	12290000	-0.110259	0.00917447
chr3L	5660000	5760000	-0.0880417	0.00919351
chr4	870000	970000	0.103983	0.00924844
chr2R	4110000	4210000	0.121513	0.00927841
chr3R	140000	240000	-0.0974895	0.00931941
chr2L	1890000	1990000	-0.0887866	0.00938685
chrX	15280000	15380000	-0.0886936	0.00945252
chrX	2840000	2940000	-0.101255	0.00950281
chr4	950000	1050000	0.0898924	0.00954647
chr4	140000	240000	0.0801592	0.00954647
chr2R	9130000	9230000	-0.0806463	0.00954647
chr2R	540000	640000	-0.0915774	0.00954647
chr3L	24840000	24940000	0.0901978	0.00959969
chr3L	27030000	27130000	-0.0844912	0.00961992
chr3R	22440000	22540000	-0.0862321	0.00963009
chr2R	2320000	2420000	0.163328	0.00969476
chrX	22020000	22120000	0.261634	0.00970295
chrUn_DS484484v1	0	2020	0.222402	0.0097435
chr2L	18160000	18260000	0.0837741	0.00974628
chrUn_CP007120v1	0	76973	-0.0810855	0.00977916
chr3R	19350000	19450000	0.0893229	0.00977916
chr3R	21130000	21230000	0.0768421	0.00977916
chr3L	25320000	25420000	-0.0823382	0.00978843
chr2L	11440000	11540000	-0.0842627	0.00980388
chr3R	6570000	6670000	-0.0847583	0.00988819
chrY	1320000	1420000	0.239182	0.00988819
chr2L	10920000	11020000	0.0877179	0.00988819
chr3R	27370000	27470000	-0.126828	0.00990315
chr3R	13170000	13270000	-0.081824	0.00995511
chr2R	4090000	4190000	0.110233	0.00996138
chr3R	14110000	14210000	0.090076	0.0100041
chrX	19050000	19150000	0.0951036	0.0100041
chrX	5030000	5130000	0.0964415	0.0100119
chr2L	10840000	10940000	0.0841331	0.0100751
chr3L	11290000	11390000	0.0811672	0.0100886
chr2R	3300000	3400000	0.193751	0.0100886
chr2R	3250000	3350000	0.172146	0.0100886
chr2R	4060000	4160000	0.103125	0.0100886
chr2R	1610000	1710000	-0.103308	0.0100887
chr2L	12130000	12230000	-0.086266	0.0100958
chr2R	4130000	4230000	0.121242	0.0100958
chr3L	24810000	24910000	0.116386	0.0100958
chr2R	5570000	5670000	0.103505	0.0100958
chr3L	25180000	25280000	0.0911807	0.0101005
chr2R	4000000	4100000	0.101738	0.0101106
chr2L	23020000	23120000	0.0923196	0.0101106
chr2L	11650000	11750000	-0.0975437	0.0101557
chr2L	23360000	23460000	0.101399	0.0101731
chr2L	1920000	2020000	-0.0890504	0.0101731
chr2L	23120000	23220000	0.0810497	0.0101731
chr3R	3040000	3140000	0.122025	0.0101785
chr3L	5650000	5750000	-0.0854273	0.0101785
chr2R	4100000	4200000	0.125657	0.0101828
chr2L	3540000	3640000	-0.0863938	0.0101868
chr2L	16110000	16210000	-0.104092	0.0101868
chr2L	21480000	21580000	0.155836	0.0101868
chr3R	28100000	28200000	-0.0842076	0.0101868
chrX	22430000	22530000	0.0989313	0.0101868
chrX	22240000	22340000	0.190444	0.0101868
chr2L	23130000	23230000	0.0839066	0.0101868
chr3R	25090000	25190000	-0.0772117	0.0101868
chr2L	23380000	23480000	0.090367	0.0101868
chr2L	21490000	21590000	0.0799887	0.0101868
chr2R	6280000	6380000	0.113589	0.0101868
chr2L	10640000	10740000	-0.107352	0.0101868
chr3L	19570000	19670000	-0.0810052	0.010208
chr3R	100000	200000	-0.099779	0.0102275
chr2L	1810000	1910000	-0.081836	0.0102295
chr2R	21410000	21510000	0.0858291	0.0102964
chr3L	6300000	6400000	0.0802966	0.0102964
chr2R	10150000	10250000	-0.118327	0.0102964
chr3R	17220000	17320000	-0.107827	0.0102964
chrX	15220000	15320000	-0.100182	0.0102964
chrX	4960000	5060000	0.0841164	0.0103476
chr3R	4530000	4630000	0.0790276	0.0103861
chrX	20720000	20820000	-0.110279	0.0103861
chr2L	4230000	4330000	-0.0861646	0.0103884
chr2R	4030000	4130000	0.0764425	0.0103884
chr2L	20250000	20350000	-0.0835546	0.0103884
chrX	3140000	3240000	-0.12116	0.0103884
chr3L	25450000	25550000	0.110823	0.0104117
chrX	4990000	5090000	0.082812	0.0104275
chr3R	14090000	14190000	0.0873052	0.0104275
chr3L	400000	500000	-0.0854959	0.0104277
chr2R	3670000	3770000	0.166348	0.0104277
chr3R	9920000	10020000	-0.0813614	0.0104452
chr3L	27050000	27150000	-0.0828405	0.0105217
chr2R	11470000	11570000	0.121746	0.0105511
chrX	20730000	20830000	-0.111646	0.0105692
chr3R	6540000	6640000	-0.0794872	0.010579
chr3L	11560000	11660000	0.0934881	0.010579
chr3L	27070000	27170000	-0.0752293	0.010579
chr3L	11130000	11230000	-0.0799164	0.010579
chr2R	15200000	15300000	-0.0765976	0.0106078
chr3L	27710000	27810000	0.109619	0.0106078
chr3R	9890000	9990000	-0.0806853	0.0106599
chr2R	15190000	15290000	-0.079226	0.0106763
chr2L	1820000	1920000	-0.0857331	0.0106792
chr2R	22310000	22410000	0.0895237	0.0106792
chr3L	540000	640000	0.0949533	0.0106792
chr3L	24800000	24900000	0.110313	0.0106792
chr3R	680000	780000	0.0927135	0.0106792
chr3L	6370000	6470000	0.0822879	0.0106792
chrX	5720000	5820000	-0.102953	0.0107115
chrX	13370000	13470000	0.0842848	0.0108263
chrX	22230000	22330000	0.189981	0.0108416
chr3L	7110000	7210000	-0.0894703	0.0108416
chr3L	17150000	17250000	-0.101857	0.0108416
chr3R	6550000	6650000	-0.0767428	0.0108519
chr2R	3330000	3430000	0.181987	0.0108623
chr2L	23040000	23140000	0.09957	0.0108623
chr3R	6530000	6630000	-0.0769519	0.010904
chr2R	2540000	2640000	-0.0976526	0.0109273
chr2R	3260000	3360000	0.167468	0.0109273
chrX	22190000	22290000	0.198967	0.0109356
chr3L	15160000	15260000	0.0772215	0.0109526
chr3L	6360000	6460000	0.0844185	0.0109526
chr2R	12120000	12220000	-0.0956004	0.0109526
chr4	1300000	1348131	-0.182441	0.0110323
chr2L	23170000	23270000	0.0993629	0.0110325
chr3L	14440000	14540000	0.0852353	0.0110454
chr3R	28890000	28990000	-0.0875423	0.011104
chr2L	10620000	10720000	-0.0967022	0.0111541
chr2R	10190000	10290000	-0.0966158	0.0111541
chrUn_DS484226v1	0	2576	0.171534	0.0111567
chr2L	23190000	23290000	0.128346	0.0111567
chr3L	24820000	24920000	0.106094	0.0111801
chr3R	28060000	28160000	-0.0835618	0.0111801
chr2L	1940000	2040000	-0.0905676	0.0112006
chr3R	21280000	21380000	-0.0763673	0.0112006
chrX	3120000	3220000	-0.134088	0.0112006
chr3R	21730000	21830000	0.0842355	0.011334
chr3L	14420000	14520000	0.0882044	0.0113742
chr2R	18750000	18850000	-0.0920791	0.0113742
chr2L	17870000	17970000	-0.0815689	0.0113885
chr2L	16070000	16170000	-0.119857	0.0113885
chr3R	21770000	21870000	0.0872288	0.0114261
chr2L	20140000	20240000	0.080521	0.0114261
chr3R	6600000	6700000	-0.0789295	0.0114261
chr2L	6650000	6750000	-0.0723355	0.0114261
chrX	22810000	22910000	-0.0883542	0.0114573
chr2L	10850000	10950000	0.0788261	0.0114573
chr3L	24250000	24350000	0.095959	0.0114573
chr3L	23540000	23640000	-0.100368	0.0114684
chr2R	6350000	6450000	-0.172108	0.0116267
chrUn_DS485255v1	0	1190	0.145839	0.0116571
chr2L	22330000	22430000	0.0908852	0.0116571
chr3R	16730000	16830000	-0.0855718	0.0117504
chr3R	12650000	12750000	-0.0848756	0.0119995
chr3R	16690000	16790000	-0.0796336	0.0119995
chr2L	22340000	22440000	0.100283	0.0119995
chr3R	720000	820000	0.107871	0.0119995
chr3L	22530000	22630000	-0.0783219	0.0120599
chr2L	10610000	10710000	-0.0871688	0.0120959
chr3L	23660000	23760000	-0.104401	0.0121512
chr3R	22020000	22120000	-0.0780284	0.0121937
chr3R	28120000	28220000	-0.0906496	0.0122072
chr2L	1150000	1250000	0.0771463	0.0122072
chrX	22800000	22900000	-0.0874628	0.0122212
chr2L	23110000	23210000	0.0717133	0.0122813
chr3R	28110000	28210000	-0.0888251	0.0123122
chr3L	27900000	28000000	0.0912248	0.012326
chr3R	28070000	28170000	-0.0825172	0.012326
chr3L	18130000	18230000	0.0825599	0.012326
chr3R	5690000	5790000	-0.0796691	0.0123914
chr2L	1840000	1940000	-0.0791695	0.0123914
chr3L	24850000	24950000	0.0852383	0.0123929
chr2L	16060000	16160000	-0.12281	0.0124252
chr3R	21120000	21220000	0.0773907	0.0124742
chr3L	550000	650000	0.0970943	0.0125031
chr2R	15180000	15280000	-0.0775067	0.0125168
chr3R	27350000	27450000	-0.0971193	0.0125168
chr2R	23470000	23570000	-0.0801434	0.0125182
chr3L	18160000	18260000	0.0878436	0.0125359
chr2R	3220000	3320000	0.119173	0.0125359
chr3R	21270000	21370000	-0.0778712	0.0125359
chr3R	22530000	22630000	-0.0872461	0.0125931
chr4	930000	1030000	0.0824687	0.0125948
chr3L	24860000	24960000	0.0927919	0.0125948
chr2L	1950000	2050000	-0.0947941	0.0125948
chr2R	7960000	8060000	-0.0786722	0.0126422
chr2L	1130000	1230000	0.0749303	0.0126422
chr3R	6560000	6660000	-0.0808433	0.0126738
chrX	12750000	12850000	0.0808114	0.012676
chr3R	3310000	3410000	0.0869346	0.012676
chr2R	9120000	9220000	-0.0729859	0.012676
chrX	22790000	22890000	-0.107586	0.012676
chrX	4930000	5030000	0.0811596	0.0126767
chr3R	22830000	22930000	-0.0874513	0.0126767
chr3R	16750000	16850000	-0.0725772	0.0127008
chr2R	20810000	20910000	-0.114665	0.0127008
chrX	21710000	21810000	0.128799	0.0127008
chrX	20230000	20330000	-0.0831927	0.0127008
chr3L	4790000	4890000	-0.0726001	0.0127008
chr3L	19090000	19190000	0.0833976	0.0127008
chr3R	2430000	2530000	0.0827626	0.0127008
chrX	14700000	14800000	-0.0920506	0.0127008
chr2R	4120000	4220000	0.110927	0.0127008
chrX	20650000	20750000	-0.134896	0.0127008
chrX	11610000	11710000	0.0789383	0.0127008
chrX	15740000	15840000	0.100494	0.0127008
chr3L	24890000	24990000	0.0892089	0.0127008
chrX	6280000	6380000	0.0752085	0.0127008
chr3L	23780000	23880000	-0.112485	0.0127008
chr3R	10250000	10350000	-0.0927063	0.0127008
chr3R	12510000	12610000	-0.0754849	0.0127008
chr3R	25800000	25900000	0.081765	0.0127008
chr3R	2530000	2630000	0.0752881	0.0127008
chr2R	1620000	1720000	-0.103379	0.0127008
chr3L	26440000	26540000	0.121268	0.0127008
chr2R	580000	680000	-0.0759043	0.0127008
chr3R	9320000	9420000	0.0783573	0.0127177
chr3L	7490000	7590000	-0.0926266	0.0127384
chrX_DS484633v1_random	0	1775	-0.158657	0.0127384
chr3R	15810000	15910000	0.0891215	0.0127384
chr3L	18120000	18220000	0.0744171	0.0127384
chr3L	26630000	26730000	0.102116	0.0127384
chr3R	9840000	9940000	-0.0762167	0.0127384
chr3L	410000	510000	-0.0809431	0.0127384
chr3R	16770000	16870000	-0.0724486	0.0127384
chr2R	1800000	1900000	-0.0962978	0.0127384
chr2R	5520000	5620000	0.0849823	0.0127384
chr3R	6630000	6730000	-0.086791	0.0127384
chrX_DS483971v1_random	0	3478	-0.169308	0.0127384
chr3R	28180000	28280000	-0.106767	0.0127766
chr3L	6830000	6930000	0.076738	0.0127766
chr3R	27440000	27540000	-0.0999027	0.0127766
chr3R	5060000	5160000	0.0802823	0.0127766
chr3R	17260000	17360000	-0.0865658	0.0127766
chr3R	25050000	25150000	-0.0710901	0.0128046
chrX	9390000	9490000	0.100033	0.0128138
chr2L	1160000	1260000	0.0787575	0.0129159
chr3L	14450000	14550000	0.0742403	0.0129159
chr3R	120000	220000	-0.0764652	0.0129159
chr3R	28080000	28180000	-0.0786285	0.0129527
chr2L	10670000	10770000	-0.101048	0.0129901
chr2L	20280000	20380000	-0.0898499	0.0129901
chr2L	9270000	9370000	0.0796383	0.0130721
chr2R	15210000	15310000	-0.0714089	0.0130721
chr2R	11450000	11550000	0.102187	0.0131575
chr3R	22480000	22580000	-0.091705	0.0131888
chr3R	12530000	12630000	-0.0762728	0.0131888
chr3R	28600000	28700000	-0.0862656	0.0132133
chr2R	15400000	15500000	0.0726043	0.0132467
chrX	4910000	5010000	0.0795859	0.0132696
chr3R	14060000	14160000	0.087453	0.0132824
chr3R	22790000	22890000	-0.0978602	0.0133072
chr4	1310000	1348131	-0.245388	0.0133332
chr3R	700000	800000	0.167971	0.0133769
chr3R	16720000	16820000	-0.108092	0.0133769
chrX	4920000	5020000	0.0824521	0.0133769
chr3R	690000	790000	0.0986388	0.0133769
chr2R	9860000	9960000	0.0962316	0.0133769
chr3L	26120000	26220000	-0.105715	0.0134417
chr2L	18240000	18340000	0.0817728	0.0134526
chrX	9380000	9480000	0.0871421	0.0134788
chrX	22820000	22920000	-0.0900299	0.0135146
chr3R	20350000	20450000	-0.0747071	0.0135227
chr3R	25140000	25240000	-0.0710837	0.013532
chr3L	7090000	7190000	-0.0864251	0.013532
chrX	3110000	3210000	-0.129909	0.0135352
chr2L	20090000	20190000	-0.0882087	0.0135352
chrX	13360000	13460000	0.0822704	0.0135352
chr3L	21000000	21100000	0.0912179	0.0135392
chr3L	23500000	23600000	-0.0979851	0.0135625
chr2L	23230000	23330000	0.117169	0.013575
chr3L	15140000	15240000	0.0738017	0.013575
chr2R	1930000	2030000	-0.1017	0.013575
chr3L	370000	470000	-0.0852668	0.0136161
chrX	5050000	5150000	0.0744516	0.0136505
chrX	3090000	3190000	-0.10403	0.0136505
chr3R	760000	860000	0.155167	0.0136505
chr2R	4690000	4790000	0.078733	0.0136505
chrX	5040000	5140000	0.0750794	0.0136505
chr3L	19580000	19680000	-0.0748697	0.0136505
chr3R	25100000	25200000	-0.0715018	0.0136505
chr3R	9300000	9400000	0.076254	0.0136505
chrX	20700000	20800000	-0.114055	0.0136505
chr3L	6280000	6380000	0.0720949	0.0136505
chrX	15240000	15340000	-0.0790908	0.0136873
chr2R	10170000	10270000	-0.103753	0.0137903
chr2R	19890000	19990000	0.097986	0.0138506
chr2L	12110000	12210000	-0.0870113	0.0138962
chr3L	14430000	14530000	0.0799209	0.0139007
chr2R	12110000	12210000	-0.0860467	0.0139157
chr3R	2230000	2330000	0.0967815	0.0139407
chr2R	18980000	19080000	-0.0762076	0.0139538
chr3L	20820000	20920000	0.0765016	0.0140297
chr2R	4080000	4180000	0.109768	0.0140297
chr2L	16090000	16190000	-0.120467	0.0140403
chr2L	23050000	23150000	0.105988	0.0140524
chr4	960000	1060000	0.0896027	0.0140524
chrX	14680000	14780000	-0.0905925	0.0140524
chr2R	15170000	15270000	-0.0718047	0.0140524
chr3R	28840000	28940000	-0.0831159	0.0140524
chr2L	20040000	20140000	-0.0863522	0.0140524
chr2L	12200000	12300000	-0.109887	0.0140524
chr3R	16830000	16930000	-0.0813172	0.0140555
chr3L	25190000	25290000	0.0776221	0.0140748
chr2L	11370000	11470000	-0.0727039	0.0140748
chr2L	22020000	22120000	-0.0754794	0.0140994
chr3L	11300000	11400000	0.0704249	0.0141053
chr2L	20170000	20270000	0.0900804	0.0141774
chr3R	25060000	25160000	-0.0722892	0.0141922
chr3L	6400000	6500000	0.0716927	0.0142674
chrX	21740000	21840000	0.123024	0.0143331
chrX	1790000	1890000	-0.0720827	0.01437
chr2L	21970000	22070000	-0.0737635	0.01437
chr2R	21420000	21520000	0.0716064	0.0143866
chr3R	27360000	27460000	-0.110046	0.0143866
chr2L	10600000	10700000	-0.100052	0.0143866
chr3R	28190000	28290000	-0.104015	0.0143866
chrX	22300000	22400000	0.143033	0.0143866
chr2R	3460000	3560000	0.077934	0.0143866
chrX	7890000	7990000	0.0808972	0.0143866
chr3L	10350000	10450000	0.0746069	0.0143866
chr2L	10870000	10970000	0.0851995	0.0143866
chr3L	25890000	25990000	0.093365	0.0143866
chr3L	26740000	26840000	0.103576	0.0143901
chr3L	26610000	26710000	0.0909436	0.0144628
chr3R	16780000	16880000	-0.0718371	0.0144855
chrX	15210000	15310000	-0.107376	0.0144855
chr3L	26620000	26720000	0.0874369	0.0144855
chr3L	13680000	13780000	-0.085433	0.0144855
chr2L	10900000	11000000	0.0722196	0.0144855
chr2L	22540000	22640000	-0.0865198	0.0145029
chrX	5010000	5110000	0.0744231	0.0145029
chr3R	2560000	2660000	0.0903459	0.0145029
chr2L	21950000	22050000	-0.0755175	0.0145187
chr3L	6820000	6920000	0.0677186	0.0145553
chr2L	23200000	23300000	0.139934	0.0145748
chrX	130000	230000	0.0833107	0.0147157
chr2R	25040000	25140000	-0.0748349	0.0147157
chr3R	9270000	9370000	0.0766681	0.014759
chr3L	7120000	7220000	-0.077677	0.0148122
chrX	4940000	5040000	0.0815258	0.0148451
chr2R	4070000	4170000	0.0986528	0.0148785
chr3L	23490000	23590000	-0.0892081	0.0149479
chr3R	22460000	22560000	-0.079308	0.0149479
chr2L	11430000	11530000	-0.076032	0.0150064
chr2R	11460000	11560000	0.113729	0.0150191
chr3L	25170000	25270000	0.0875866	0.0150191
chr2L	12100000	12200000	-0.0785087	0.0150768
chr2L	4270000	4370000	-0.0708792	0.0151542
chr2R	290000	390000	0.0746239	0.0151744
chr3R	3900000	4000000	0.122171	0.0151744
chr2L	13760000	13860000	-0.0736698	0.0151744
chrX	13820000	13920000	0.0724695	0.0152379
chrX	22280000	22380000	0.195352	0.0152416
chrX	12740000	12840000	0.072058	0.0152416
chrUn_CP007091v1	10000	20763	0.189916	0.0152416
chr3R	21650000	21750000	0.0728732	0.0152448
chr2L	9280000	9380000	0.0825929	0.015353
chr4	240000	340000	0.0958985	0.0154945
chr2L	22030000	22130000	-0.0749757	0.0154945
chr3R	19810000	19910000	-0.0748166	0.0155179
chr2L	14480000	14580000	0.0713623	0.0155654
chrX	20640000	20740000	-0.115323	0.0155737
chr3L	25210000	25310000	0.0969116	0.0157178
chr2R	25060000	25160000	-0.0883361	0.0157178
chrX	22220000	22320000	0.176111	0.0157178
chrX	16920000	17020000	-0.0730119	0.0157178
chr3R	9860000	9960000	-0.0739726	0.0157427
chr2L	21940000	22040000	-0.0783305	0.0157449
chrX	15250000	15350000	-0.0773062	0.0157655
chr3R	3280000	3380000	0.074685	0.0158
chr2L	18170000	18270000	0.0717034	0.0158497
chr2L	20080000	20180000	-0.0845466	0.0158541
chr3L	24870000	24970000	0.0920456	0.0158541
chr2L	20240000	20340000	-0.070433	0.0159405
chr2R	10230000	10330000	-0.0723729	0.0159458
chr2L	10650000	10750000	-0.0980406	0.0159458
chr3R	29560000	29660000	-0.0732043	0.0159458
chrX	5710000	5810000	-0.0991811	0.0159458
chr2R	4050000	4150000	0.09097	0.0159458
chr2R	2590000	2690000	-0.0802537	0.0159458
chr3L	25640000	25740000	0.0840993	0.0159458
chr2R	22650000	22750000	0.0707387	0.0159458
chr3R	9850000	9950000	-0.074368	0.016006
chr2R	3280000	3380000	0.188114	0.0160433
chr3R	15800000	15900000	0.0830395	0.0160776
chr3L	5630000	5730000	-0.0768188	0.0160975
chrX	19990000	20090000	-0.0966586	0.0160975
chr3R	21990000	22090000	-0.0820726	0.0161317
chr3R	22470000	22570000	-0.0791637	0.0161417
chr3R	12750000	12850000	0.0808488	0.016147
chr2R	3500000	3600000	0.109423	0.016155
chr2L	500000	600000	-0.0705934	0.016155
chr3R	13450000	13550000	-0.0828756	0.016155
chr2R	21720000	21820000	0.0763515	0.0161602
chr2R	13530000	13630000	-0.0795554	0.016191
chr3L	11970000	12070000	0.0808247	0.016191
chr3L	590000	690000	0.0781298	0.016191
chr2L	22720000	22820000	-0.0779056	0.0162006
chr3L	15550000	15650000	0.0731795	0.0162006
chr3R	9290000	9390000	0.0817191	0.0162347
chr2R	3450000	3550000	0.0739136	0.0162757
chr3R	28220000	28320000	-0.0712628	0.0163204
chr2R	400000	500000	-0.0673332	0.0163601
chr3L	22620000	22720000	0.0734883	0.0163601
chr3L	380000	480000	-0.0809219	0.0163813
chr3L	18860000	18960000	0.0817968	0.0163813
chr3R	3050000	3150000	0.124651	0.0163813
chr3L	25650000	25750000	0.0796876	0.0165139
chr3L	2790000	2890000	0.0976291	0.0165405
chr3R	22000000	22100000	-0.0875564	0.0165649
chrUn_DS483659v1	0	13416	0.273778	0.0165766
chr3R	13670000	13770000	-0.0696121	0.0165766
chr3R	5050000	5150000	0.0723581	0.0165766
chr3R	25460000	25560000	0.0799252	0.0166991
chr3L	19600000	19700000	-0.0697008	0.0167515
chr2L	1850000	1950000	-0.0723952	0.0167515
chrX	16910000	17010000	-0.0734956	0.0167966
chr2R	18950000	19050000	-0.0685914	0.0167966
chr3R	130000	230000	-0.086592	0.0168016
chr2R	13570000	13670000	-0.0909151	0.0168891
chr3R	9060000	9160000	0.0890127	0.0169037
chr2L	16120000	16220000	-0.0761051	0.0169233
chr2R	17770000	17870000	-0.0850584	0.0169421
chr2R	25070000	25170000	-0.0798932	0.0169421
chr3L	17140000	17240000	-0.0933174	0.0169421
chr3R	28210000	28310000	-0.0782522	0.0169603
chr3R	14710000	14810000	0.071137	0.0169837
chrX	22720000	22820000	-0.0967592	0.0169837
chrY	1640000	1740000	-0.192625	0.0169837
chr2L	15100000	15200000	-0.087072	0.0171822
chrX	15770000	15870000	0.0715178	0.0171955
chr2R	18740000	18840000	-0.074823	0.0171955
chr2L	1960000	2060000	-0.084965	0.0171955
chrX	14670000	14770000	-0.102572	0.0171955
chr2R	23990000	24090000	-0.0699632	0.0171955
chr3L	27920000	28020000	0.0914084	0.0171955
chr2R	19000000	19100000	-0.0759883	0.0171955
chr3R	12660000	12760000	-0.0722971	0.0171955
chr2L	8400000	8500000	-0.0699152	0.0171955
chr2L	23100000	23200000	0.0655616	0.0171955
chr3L	5680000	5780000	-0.0750127	0.0171955
chr2L	23210000	23310000	0.145621	0.0171955
chr2R	2330000	2430000	0.155519	0.0171955
chr3R	670000	770000	0.102357	0.0171955
chr2L	9630000	9730000	0.0798138	0.0171955
chr2L	8390000	8490000	-0.0691231	0.0171955
chrX	19410000	19510000	-0.0914206	0.0171955
chr2R	22320000	22420000	0.086265	0.0171955
chr2L	20020000	20120000	-0.066497	0.0173364
chrX	1800000	1900000	-0.067683	0.0173364
chr2R	11270000	11370000	-0.0961036	0.0173364
chrX	5740000	5840000	-0.0849403	0.0173364
chr3L	7460000	7560000	-0.080742	0.0174207
chr3L	15180000	15280000	0.0690507	0.0174372
chr3R	20370000	20470000	-0.079946	0.0175216
chr3R	13180000	13280000	-0.0737341	0.0175216
chr2L	3930000	4030000	0.0828873	0.0175216
chr2R	530000	630000	-0.0817878	0.0175304
chr2L	2470000	2570000	-0.0780817	0.0176193
chrX	23400000	23500000	-0.0983223	0.0177468
chrX	22840000	22940000	-0.0979904	0.0177857
chr2L	11640000	11740000	-0.074115	0.0177857
chr3L	23580000	23680000	-0.0712387	0.017806
chr2R	60000	160000	-0.104814	0.017932
chr3L	10760000	10860000	0.0754796	0.017932
chr2L	10630000	10730000	-0.0901458	0.0179573
chr3L	25730000	25830000	0.0944787	0.0181851
chr2L	14800000	14900000	-0.101	0.0181851
chr3R	12520000	12620000	-0.0800437	0.0181992
chr2R	14430000	14530000	-0.0760311	0.0182488
chr2L	11380000	11480000	-0.0651376	0.0183012
chr3R	3220000	3320000	-0.0817313	0.0183341
chr3L	5670000	5770000	-0.0802068	0.0183581
chr3R	3210000	3310000	-0.073263	0.018403
chr3L	11990000	12090000	0.0841794	0.0184099
chr3R	31250000	31350000	-0.0750016	0.0184283
chr3R	17300000	17400000	-0.0707294	0.018429
chr3R	9280000	9380000	0.0798122	0.0184426
chr2R	23590000	23690000	-0.0711762	0.0185215
chrX	14690000	14790000	-0.0893297	0.0185611
chr4	1170000	1270000	0.0762109	0.0185975
chrX	1770000	1870000	-0.065057	0.0186853
chr2L	20030000	20130000	-0.0712356	0.0186853
chr3L	24530000	24630000	0.10272	0.0187526
chr2L	22320000	22420000	0.090459	0.0187526
chr3L	510000	610000	0.0697706	0.0187526
chr3L	25430000	25530000	0.0973549	0.0187526
chrX	11130000	11230000	0.0794625	0.0187767
chr2R	16740000	16840000	-0.0671779	0.0187767
chr2R	3270000	3370000	0.162817	0.0187767
chr3L	24390000	24490000	-0.0912276	0.0188149
chrX	17470000	17570000	0.0866618	0.0188149
chrX	21690000	21790000	0.11672	0.0188149
chr2L	3950000	4050000	0.0817341	0.0188149
chr3L	15150000	15250000	0.0672982	0.0188369
chr3L	25530000	25630000	0.0708262	0.0188709
chrX	23410000	23510000	-0.083615	0.0188709
chr3R	31350000	31450000	0.0730417	0.0188766
chr2R	5500000	5600000	0.0647419	0.0188766
chr3L	7450000	7550000	-0.0796643	0.0189368
chr3R	21110000	21210000	0.0723815	0.0190484
chr3R	29660000	29760000	0.0731158	0.0190484
chr3L	7180000	7280000	-0.079714	0.0191253
chr3R	15760000	15860000	0.08344	0.0191634
chr3R	25440000	25540000	0.0840997	0.0193232
chrX	120000	220000	0.0729735	0.0193522
chr2L	23060000	23160000	0.107422	0.0193556
chr3L	11330000	11430000	0.0703192	0.0195093
chr2L	1880000	1980000	-0.072773	0.0195208
chr3L	16010000	16110000	0.0693941	0.0195253
chr2L	22350000	22450000	0.0816843	0.019532
chr2R	1840000	1940000	-0.0667687	0.0196128
chr4	910000	1010000	0.0728965	0.019688
chr3L	27930000	28030000	0.0915411	0.0196917
chr2R	1790000	1890000	-0.103469	0.0197151
chr3R	25110000	25210000	-0.0642304	0.0197156
chr2R	9890000	9990000	0.075668	0.0197317
chr3L	15600000	15700000	0.0692987	0.0198327
chrX	22690000	22790000	-0.0984922	0.0198748
chrX	20120000	20220000	-0.102748	0.0198803
chr3R	9330000	9430000	0.0697356	0.0199122
chr3R	5730000	5830000	-0.0894151	0.0199122
chr3L	2780000	2880000	0.0895043	0.0199122
chr3L	25740000	25840000	0.0891207	0.0199122
chr2R	590000	690000	-0.0679503	0.0200312
chr2L	14860000	14960000	-0.0742706	0.0200871
chrX	20170000	20270000	-0.09805	0.0200871
chr2R	13700000	13800000	-0.068921	0.0201159
chr2L	1970000	2070000	-0.0688502	0.0201261
chr3L	21030000	21130000	0.0807478	0.020236
chrX	4980000	5080000	0.0701929	0.0204007
chr2R	9450000	9550000	0.0735634	0.0204734
chr3R	28050000	28150000	-0.0764234	0.0204842
chr3R	19430000	19530000	0.0692011	0.0205405
chrX	4970000	5070000	0.0665272	0.0205612
chrX	21880000	21980000	0.119822	0.0206276
chr2L	22130000	22230000	0.0755329	0.0206986
chr2L	2480000	2580000	-0.069231	0.0207013
chr2R	18990000	19090000	-0.0714829	0.0207352
chrX	19670000	19770000	0.0641392	0.020841
chr2L	17850000	17950000	-0.0812584	0.0208457
chr3L	5750000	5850000	-0.0709764	0.0208903
chrX	22210000	22310000	0.178777	0.0208903
chr2R	3900000	4000000	0.0973737	0.021013
chrX_DS484387v1_random	0	2210	-0.135561	0.0211312
chrX	22700000	22800000	-0.100389	0.0211974
chr2L	10980000	11080000	0.0796128	0.0212144
chr2R	13010000	13110000	0.0699234	0.0214249
chr3R	21750000	21850000	0.0793674	0.0214249
chr3L	22510000	22610000	-0.0668003	0.0215409
chr3R	22040000	22140000	-0.0655852	0.0217169
chr3R	11880000	11980000	0.0701504	0.0217169
chr3L	530000	630000	0.0791343	0.0217169
chr2L	22470000	22570000	-0.0678318	0.0217169
chr3R	23950000	24050000	0.0735645	0.0217169
chr3L	6420000	6520000	0.0689989	0.0217169
chr2L	22490000	22590000	-0.0628045	0.0217169
chr2L	10990000	11090000	0.077794	0.0217238
chr2L	10660000	10760000	-0.0893346	0.0217238
chr3R	6130000	6230000	-0.075393	0.0217238
chr3L	13570000	13670000	-0.0879448	0.0217378
chr3L	23680000	23780000	-0.0973812	0.0217738
chr2R	22640000	22740000	0.0652455	0.0217817
chr3L	19390000	19490000	0.0730883	0.0217817
chr2R	300000	400000	0.0804974	0.0218139
chr2L	14810000	14910000	-0.0927338	0.0218139
chr3R	13190000	13290000	-0.0783969	0.0218139
chr2R	16730000	16830000	-0.0630362	0.0218303
chr2R	5670000	5770000	-0.0690055	0.0218855
chr2R	11440000	11540000	0.111295	0.0219041
chr2R	3050000	3150000	0.0926449	0.0219041
chr3R	2420000	2520000	0.0887039	0.0219041
chr2R	23980000	24080000	-0.0665542	0.0219054
chr3R	17810000	17910000	0.0629617	0.0219054
chr2L	18360000	18460000	0.0701557	0.0219054
chr3R	9830000	9930000	-0.0713917	0.0219054
chrX	4310000	4410000	0.0672992	0.0219054
chr3R	21150000	21250000	0.0663129	0.0219054
chr3R	31390000	31490000	0.0723393	0.0219054
chr3R	14050000	14150000	0.0741956	0.0219054
chrX	5020000	5120000	0.0632352	0.0219054
chr3L	24240000	24340000	0.0729139	0.0219054
chrX_CP007103v1_random	20000	33320	-0.144256	0.0219748
chr2L	490000	590000	-0.0677341	0.0219748
chr2R	660000	760000	0.0838802	0.0219886
chr2L	6380000	6480000	-0.0782943	0.0220359
chrX	22200000	22300000	0.186738	0.0220455
chr3R	9070000	9170000	0.0772344	0.0220455
chr2R	23710000	23810000	-0.0635969	0.0220743
chr2R	15410000	15510000	0.0624858	0.0221423
chr3R	5080000	5180000	0.0667685	0.0221423
chr3L	7170000	7270000	-0.073032	0.0221742
chr3R	12630000	12730000	-0.0631175	0.022187
chr2R	18940000	19040000	-0.0632554	0.022187
chr3R	6500000	6600000	-0.0667662	0.0221918
chr3L	9080000	9180000	-0.0694582	0.0222993
chr3R	1720000	1820000	0.163806	0.0222993
chr3L	11120000	11220000	-0.0716216	0.0223166
chrX	5210000	5310000	0.0690412	0.0223362
chr3L	7470000	7570000	-0.0741191	0.0223631
chrX	12720000	12820000	0.0790575	0.0223631
chr3L	20850000	20950000	0.0768022	0.0223631
chr3L	5620000	5720000	-0.0783125	0.0223631
chr3L	560000	660000	0.0764738	0.0223631
chr3L	20800000	20900000	0.067587	0.0223631
chr3L	15170000	15270000	0.0642716	0.0223631
chr3R	9080000	9180000	0.0713656	0.0223631
chr3R	21980000	22080000	-0.0753946	0.0223631
chr3R	31340000	31440000	0.0651737	0.0223827
chr3R	21140000	21240000	0.0630847	0.0223895
chrX	22730000	22830000	-0.0865488	0.0223918
chrX	14710000	14810000	-0.0726979	0.0224014
chr3L	2440000	2540000	0.0715944	0.0224126
chr4	860000	960000	0.0862798	0.0224126
chr3R	31380000	31480000	0.0730099	0.0224126
chrX	11730000	11830000	-0.0774251	0.0224377
chrY	1630000	1730000	-0.189076	0.0224748
chr3L	21010000	21110000	0.0828633	0.0224841
chr2R	22300000	22400000	0.073772	0.0225579
chr3R	3330000	3430000	0.0894684	0.0225683
chr3R	14120000	14220000	0.0812109	0.0225683
chr3L	3040000	3140000	-0.0696504	0.0225823
chr3R	5030000	5130000	0.0795291	0.0225894
chr3R	3710000	3810000	0.0698226	0.0225894
chr2R	5580000	5680000	0.0800224	0.0225894
chr3L	26320000	26420000	-0.115351	0.0225894
chr2R	11240000	11340000	-0.0934387	0.0226414
chr2L	10470000	10570000	0.0727923	0.022741
chrUn_CP007120v1	50000	76973	-0.176443	0.022741
chr3L	6440000	6540000	0.0656635	0.0229636
chr3R	19420000	19520000	0.070591	0.0230057
chr3R	25470000	25570000	0.0778395	0.0230057
chr3R	16820000	16920000	-0.080435	0.0230244
chr3L	18850000	18950000	0.0700938	0.0230244
chr3R	28380000	28480000	-0.0688206	0.0230573
chr3R	10430000	10530000	0.0647519	0.0230776
chrX	14720000	14820000	-0.0737114	0.0230776
chr3R	21640000	21740000	0.0644502	0.0231317
chr3L	11320000	11420000	0.0721335	0.0231317
chr4	920000	1020000	0.0678926	0.0231317
chr2R	13520000	13620000	-0.0687182	0.0231648
chr3L	9980000	10080000	-0.0779149	0.0231648
chr3L	11140000	11240000	-0.0678785	0.0231648
chrX	22680000	22780000	-0.0979537	0.0231648
chr3L	25660000	25760000	0.079876	0.0231733
chrX	13810000	13910000	0.0631375	0.02328
chr3R	23690000	23790000	-0.0749286	0.02328
chrX	1780000	1880000	-0.0616612	0.02328
chrX	140000	240000	0.0755907	0.02328
chr2L	12160000	12260000	-0.0920461	0.0233234
chr2L	9640000	9740000	0.0788833	0.0233449
chr3R	730000	830000	0.10983	0.0234154
chr3R	13160000	13260000	-0.0631285	0.0234721
chrX	5200000	5300000	0.0666626	0.0234721
chr2L	10450000	10550000	0.0643774	0.0235164
chr3R	3200000	3300000	-0.0716112	0.0235198
chr2L	5590000	5690000	-0.0689111	0.0235318
chr2R	2970000	3070000	-0.0988658	0.023594
chr2R	14440000	14540000	-0.0707564	0.023711
chr3L	24790000	24890000	0.0915452	0.0237425
chr3L	23570000	23670000	-0.0664088	0.023774
chr2R	13560000	13660000	-0.085443	0.0237912
chr3L	19380000	19480000	0.0686644	0.0238075
chr2R	21770000	21870000	0.0755247	0.0238512
chr2R	9760000	9860000	-0.0894685	0.0238923
chr3L	17240000	17340000	-0.0685132	0.0238923
chrUn_CP007081v1	60000	88768	-0.0988267	0.0238923
chr3R	14720000	14820000	0.0705071	0.0238923
chr3L	23510000	23610000	-0.0970441	0.0238923
chr2R	10140000	10240000	-0.093004	0.0240476
chrX	17440000	17540000	0.0741088	0.0240536
chr3R	28610000	28710000	-0.0711725	0.0240568
chr3R	3340000	3440000	0.0883694	0.0240932
chrX	13790000	13890000	0.0785838	0.0241562
chr2R	1810000	1910000	-0.0954113	0.0241562
chrX	4560000	4660000	-0.0724651	0.0241709
chr3R	21310000	21410000	-0.0623733	0.0242647
chr2R	9480000	9580000	0.0789842	0.0244048
chr3L	2760000	2860000	0.0925585	0.0244079
chr3R	27770000	27870000	-0.0723964	0.0244626
chr3R	9930000	10030000	-0.0692035	0.0246315
chr3L	1630000	1730000	-0.0647345	0.0246315
chr3R	2260000	2360000	0.111227	0.0246315
chr3L	23000000	23100000	-0.0734099	0.0246414
chr3R	2550000	2650000	0.0824467	0.0247777
chr2L	1140000	1240000	0.0659062	0.024779
chrX	22670000	22770000	-0.0995455	0.0248345
chr3R	26800000	26900000	0.0611202	0.0248345
chr3L	24910000	25010000	0.0895919	0.0248345
chr3R	17790000	17890000	0.065469	0.02488
chr3L	24510000	24610000	0.102753	0.02488
chr3L	27940000	28040000	0.0912773	0.0249145
chr3L	6240000	6340000	0.101861	0.0249794
chrX	11710000	11810000	-0.0741202	0.0249968
chr3R	28900000	29000000	-0.0631485	0.0250264
chr3R	19360000	19460000	0.0654112	0.0250346
chr2L	15920000	16020000	-0.101418	0.0250346
chr3L	15750000	15850000	0.0613439	0.0251084
chr3R	4070000	4170000	-0.072492	0.0251454
chr3R	12770000	12870000	0.0742576	0.0251594
chr3L	25900000	26000000	0.0768076	0.025211
chr2L	10910000	11010000	0.0646243	0.0252402
chr3R	24380000	24480000	-0.0619074	0.0252664
chr2L	20290000	20390000	-0.0621326	0.0252755
chr2R	2940000	3040000	-0.0954178	0.0252755
chr3R	13480000	13580000	-0.0951512	0.0252952
chr3L	4970000	5070000	-0.0796601	0.025303
chr2R	80000	180000	-0.0834829	0.025303
chr3R	26230000	26330000	-0.0651626	0.0253157
chr3R	17690000	17790000	-0.0632107	0.0253433
chr3L	19080000	19180000	0.0766484	0.0253994
chr3R	26810000	26910000	0.0625432	0.025456
chr3L	27680000	27780000	0.0935332	0.0254756
chr2L	3970000	4070000	0.084154	0.0254756
chr3L	23590000	23690000	-0.0759961	0.0254884
chr2L	520000	620000	-0.0667836	0.0254884
chr3L	4860000	4960000	-0.0758133	0.0254884
chr2R	13690000	13790000	-0.0660977	0.0254884
chr2L	10480000	10580000	0.0678804	0.0254994
chr3L	7430000	7530000	-0.0817408	0.0254994
chrX	15780000	15880000	0.0620211	0.0255007
chr3L	10940000	11040000	0.0689894	0.0255007
chr3L	520000	620000	0.0732258	0.0255007
chr2R	23640000	23740000	-0.0766364	0.0255007
chr2R	21760000	21860000	0.0692684	0.0255007
chr2R	20660000	20760000	-0.0771922	0.0255821
chr4	850000	950000	0.089095	0.0256313
chr3R	24700000	24800000	-0.0858758	0.0256313
chrUn_CP007120v1	10000	76973	-0.0780073	0.0256343
chrX	15700000	15800000	0.0845251	0.0257111
chr3R	22430000	22530000	-0.0698443	0.0257839
chr3L	17160000	17260000	-0.0890424	0.0257863
chr3L	11310000	11410000	0.0650355	0.0257863
chrX	19400000	19500000	-0.0941527	0.0257863
chr3R	21970000	22070000	-0.0834063	0.0258157
chr3R	20340000	20440000	-0.0674546	0.0258852
chrX	22900000	23000000	-0.0654597	0.0258852
chrUn_CP007081v1	20000	88768	-0.064704	0.0258852
chr2R	22660000	22760000	0.0628669	0.0258852
chr2L	1800000	1900000	-0.0622561	0.0258852
chr3L	25220000	25320000	0.0961155	0.0260108
chrX	11570000	11670000	0.0765793	0.0261205
chr3R	21570000	21670000	0.0701416	0.0261287
chr3R	10230000	10330000	-0.0678113	0.0263176
chrX	20530000	20630000	-0.099256	0.0263176
chrX	23210000	23310000	-0.0705734	0.0263176
chr2L	6940000	7040000	0.0601026	0.0263176
chr3L	20890000	20990000	0.0695674	0.0263176
chr3R	28910000	29010000	-0.0604493	0.0263176
chr2R	23580000	23680000	-0.0631951	0.0263424
chrX	20760000	20860000	-0.0941105	0.0264281
chr2L	13750000	13850000	-0.0648263	0.0264281
chr3L	10340000	10440000	0.0664707	0.0264281
chr4	690000	790000	0.0823423	0.0264927
chrX_DS484618v1_random	0	1800	0.150271	0.0264955
chr2R	5550000	5650000	0.0960071	0.0264955
chr2L	14470000	14570000	0.0613697	0.0264955
chr3L	16020000	16120000	0.0669309	0.0265182
chr3R	3030000	3130000	0.0895689	0.0265182
chr3R	3020000	3120000	0.062878	0.0265394
chrX	19960000	20060000	-0.0620939	0.026549
chr3R	24400000	24500000	-0.0681358	0.026549
chr2R	3060000	3160000	0.0811359	0.0265506
chr2R	18930000	19030000	-0.0613249	0.0265506
chr3R	3890000	3990000	0.110308	0.0265575
chr2R	720000	820000	0.133102	0.0265575
chr2L	22480000	22580000	-0.0621458	0.0266046
chr2R	11480000	11580000	0.095065	0.0266277
chrX	6720000	6820000	0.0699856	0.0266277
chr2R	20820000	20920000	-0.0916406	0.0266766
chr3L	21020000	21120000	0.0815011	0.0269092
chr3R	160000	260000	-0.0785212	0.0269368
chrX	3660000	3760000	0.0684276	0.0269735
chrX	1510000	1610000	0.0651256	0.0269849
chrX	7900000	8000000	0.0761208	0.0269998
chr3R	28140000	28240000	-0.0976781	0.0270875
chr2R	4700000	4800000	0.0699117	0.0270875
chr3L	25440000	25540000	0.0904319	0.0272208
chr2R	23700000	23800000	-0.0594102	0.0272208
chr2L	7490000	7590000	-0.0654641	0.0272336
chrX	22710000	22810000	-0.0941721	0.0272689
chr3L	13710000	13810000	-0.0887189	0.0272938
chr2R	16490000	16590000	-0.0637804	0.0273238
chr3R	31330000	31430000	0.0696423	0.0273238
chr2R	9750000	9850000	-0.0763398	0.0273249
chrX	5680000	5780000	-0.0929535	0.0273249
chrX	20240000	20340000	-0.0750166	0.0273249
chr2L	22210000	22310000	0.123353	0.0273249
chr2L	1120000	1220000	0.0595492	0.0273766
chr3R	2400000	2500000	0.0965822	0.0274134
chr2L	12150000	12250000	-0.0812918	0.0274134
chrX	9280000	9380000	-0.0823556	0.0274443
chrX	21700000	21800000	0.109647	0.0274728
chrX	17460000	17560000	0.0792709	0.0274937
chr3L	8950000	9050000	-0.0749037	0.0274937
chr3R	13730000	13830000	-0.0609197	0.0274937
chr3L	5690000	5790000	-0.0683714	0.0274937
chr2R	2300000	2400000	0.110114	0.0274937
chr2L	22250000	22350000	0.0889983	0.0274937
chr3L	27670000	27770000	0.0935127	0.0274937
chr3R	21260000	21360000	-0.070209	0.0275006
chr2L	22710000	22810000	-0.0729109	0.0276576
chr3R	22520000	22620000	-0.0799634	0.0277265
chrX	3160000	3260000	-0.0884728	0.0277265
chr3R	14890000	14990000	0.0691677	0.0277265
chr3R	24320000	24420000	-0.0734084	0.0277265
chr2L	13730000	13830000	-0.0624105	0.0277265
chr3R	9940000	10040000	-0.0624075	0.0277805
chr3L	25630000	25730000	0.0773396	0.0277805
chr2R	14470000	14570000	-0.0775286	0.027849
chr2R	5660000	5760000	-0.0646109	0.027851
chrX	5300000	5400000	0.06769	0.0279234
chr3L	25030000	25130000	0.0787182	0.0279234
chr3R	12620000	12720000	-0.0633763	0.0279234
chr2R	9850000	9950000	0.0679908	0.0279234
chr3R	16760000	16860000	-0.0604051	0.0279919
chrX	23200000	23300000	-0.0888503	0.0280004
chr2L	11490000	11590000	-0.0882879	0.0280679
chr3R	2240000	2340000	0.0963184	0.0280679
chr3L	13800000	13900000	0.0746269	0.0281222
chr2L	17840000	17940000	-0.0820146	0.0281284
chr3R	13490000	13590000	-0.0980681	0.0281348
chr3L	12000000	12100000	0.0777478	0.0281411
chr2R	20670000	20770000	-0.0743005	0.0281969
chr3L	24520000	24620000	0.0996056	0.0282722
chr3R	31230000	31330000	-0.0680237	0.0283165
chr3R	2440000	2540000	0.0632785	0.0283165
chr2L	3240000	3340000	-0.0577845	0.0283165
chr3L	6260000	6360000	0.0827237	0.0283772
chr3L	27950000	28050000	0.0858304	0.0283772
chr2R	19580000	19680000	-0.0708151	0.0283772
chr3R	20620000	20720000	0.0706251	0.0283772
chr2L	3230000	3330000	-0.0613959	0.0283772
chr2L	22730000	22830000	-0.0677064	0.0283772
chr3L	23650000	23750000	-0.073521	0.0283772
chr2R	22330000	22430000	0.0719786	0.0284483
chr3L	10980000	11080000	0.0586624	0.0284483
chr3L	6320000	6420000	0.0632415	0.0284483
chr3R	12580000	12680000	-0.0630004	0.0284961
chr2L	15840000	15940000	-0.0781423	0.0285185
chr2L	2490000	2590000	-0.0650385	0.028559
chr2R	21700000	21800000	0.0639018	0.028559
chr2L	22300000	22400000	0.088901	0.028559
chr3R	10240000	10340000	-0.0716573	0.028559
chr3L	24740000	24840000	0.0665251	0.028559
chr3L	10780000	10880000	0.0783438	0.028559
chr3R	21900000	22000000	-0.0786176	0.028559
chr3R	4540000	4640000	0.0638026	0.028623
chr3R	14440000	14540000	0.0667417	0.028623
chr3L	22610000	22710000	0.0716535	0.0286647
chr3R	13460000	13560000	-0.0777638	0.0286888
chr2L	23220000	23320000	0.111174	0.0286888
chr3L	10730000	10830000	0.0621655	0.0286888
chr3R	750000	850000	0.102093	0.0286888
chr2L	11630000	11730000	-0.0625349	0.0286888
chr3L	11980000	12080000	0.0728679	0.0286888
chr3L	2810000	2910000	0.0958292	0.0286888
chr2L	23440000	23513712	-0.0999981	0.0286888
chr3L	6380000	6480000	0.0654292	0.0287424
chr2R	20240000	20340000	-0.0781488	0.0287792
chr2L	20920000	21020000	-0.0744129	0.0288132
chr2R	3290000	3390000	0.158509	0.0288132
chr3L	4560000	4660000	-0.0651283	0.0288132
chr3R	4060000	4160000	-0.0717293	0.0288552
chr2L	12230000	12330000	-0.0690309	0.0288987
chr3R	21700000	21800000	0.0672641	0.0289106
chr3L	23610000	23710000	-0.0711542	0.0289253
chr3R	20150000	20250000	0.0712485	0.0289253
chr3L	17190000	17290000	-0.076717	0.0290188
chrX	22780000	22880000	-0.0991707	0.0290188
chr3L	20870000	20970000	0.0719759	0.0290188
chr3L	6390000	6490000	0.0643793	0.0290188
chr3L	7480000	7580000	-0.0714002	0.0290466
chrX	22760000	22860000	-0.105515	0.0290522
chr3R	10370000	10470000	0.0639198	0.0290522
chr3R	22540000	22640000	-0.075835	0.0291752
chr3L	5730000	5830000	-0.0613571	0.0293911
chr3L	24260000	24360000	0.0732985	0.0293945
chr3R	13140000	13240000	-0.0652972	0.0294006
chr2R	12130000	12230000	-0.0892384	0.0294322
chr3L	14410000	14510000	0.0841594	0.0295531
chr3R	5710000	5810000	-0.0624068	0.0296455
chr3R	1870000	1970000	0.0922231	0.0296801
chr3L	25420000	25520000	0.0988839	0.0296875
chr2R	520000	620000	-0.0727966	0.0296875
chr3R	12470000	12570000	-0.0631522	0.0296916
chrX	19680000	19780000	0.0605796	0.0296916
chr3L	7440000	7540000	-0.0773886	0.0297373
chr2L	22200000	22300000	0.1206	0.0297373
chr3L	23060000	23160000	-0.0776911	0.0297373
chr2L	11620000	11720000	-0.0628008	0.0297424
chrX	20660000	20760000	-0.112365	0.0297914
chr3L	6410000	6510000	0.0627569	0.0299042
chr3R	28160000	28260000	-0.0980136	0.0299042
chr3L	1670000	1770000	-0.0641138	0.0299962
chr3R	9800000	9900000	-0.0617654	0.0300254
chr3R	24350000	24450000	-0.0582627	0.0300291
chr3L	6310000	6410000	0.0619065	0.0300291
chr3L	4550000	4650000	-0.0637955	0.0300955
chr2L	19670000	19770000	0.0664854	0.0300955
chr3L	6430000	6530000	0.0632302	0.0301074
chr3L	2800000	2900000	0.0871773	0.0302101
chr3L	22740000	22840000	-0.0697032	0.0302622
chr3L	2770000	2870000	0.0892467	0.0302622
chr2L	5520000	5620000	-0.0757194	0.0302651
chr3R	24370000	24470000	-0.0592846	0.0302725
chrX	8690000	8790000	-0.0892597	0.030285
chr3L	27100000	27200000	-0.070581	0.0303004
chr2L	510000	610000	-0.0605196	0.0303004
chrX	17490000	17590000	0.0784718	0.0303004
chrY	3560000	3660000	-0.233798	0.0304043
chr2L	3960000	4060000	0.0673333	0.0304043
chr3L	5080000	5180000	-0.0672616	0.0304112
chrUn_CP007101v1	0	24503	-0.0878126	0.0304658
chrX	10240000	10340000	-0.0729832	0.0304658
chr3L	17110000	17210000	-0.0652345	0.0304731
chr2L	8410000	8510000	-0.0681371	0.0306192
chr3R	29670000	29770000	0.0649796	0.0306466
chr2L	7130000	7230000	0.0602375	0.0306986
chr3L	24720000	24820000	0.0564513	0.0307463
chrX	19060000	19160000	0.0679193	0.0307463
chrUn_DS483961v1	0	3527	-0.112184	0.0307463
chr3R	3230000	3330000	-0.0735101	0.0307691
chr3R	14270000	14370000	-0.0592998	0.030788
chr3L	17320000	17420000	-0.057834	0.0308707
chr3R	22400000	22500000	-0.0917275	0.0308903
chr3L	25200000	25300000	0.0749156	0.031
chrX	7870000	7970000	0.0705707	0.0310053
chr3R	10480000	10580000	0.0612371	0.0310053
chr3R	20630000	20730000	0.0718321	0.0310053
chrX	13940000	14040000	0.0662902	0.0310053
chr3L	18170000	18270000	0.0790261	0.0310636
chr3L	23480000	23580000	-0.0847239	0.0310636
chr2R	2920000	3020000	-0.0961932	0.0310636
chrX	22830000	22930000	-0.0765582	0.031092
chr3R	7640000	7740000	-0.0773057	0.031092
chr3R	10280000	10380000	-0.0682253	0.031092
chr3L	25040000	25140000	0.076624	0.031092
chr3R	28590000	28690000	-0.0716149	0.0311608
chr2L	17830000	17930000	-0.0876716	0.0311691
chr3R	5040000	5140000	0.0592397	0.0311691
chrX	21870000	21970000	0.108655	0.0311781
chrX	11180000	11280000	0.0784844	0.0312805
chrX	22880000	22980000	-0.059531	0.0313592
chrX	4290000	4390000	0.0678448	0.0313592
chr2L	10930000	11030000	0.0641819	0.0313988
chr3L	6250000	6350000	0.0891855	0.0314095
chr3R	12740000	12840000	0.0683152	0.0314224
chr2R	24190000	24290000	-0.0595681	0.0314224
chr3R	31360000	31460000	0.0578801	0.0314224
chrX	12760000	12860000	0.0589575	0.0314224
chrX	10470000	10570000	-0.0703388	0.0314224
chr3R	12240000	12340000	0.0588592	0.0314224
chr3L	11590000	11690000	0.0621826	0.0314224
chr2L	11920000	12020000	-0.0675525	0.0314224
chr3L	17130000	17230000	-0.0939851	0.0314224
chr3R	25480000	25580000	0.076749	0.0314273
chr2R	9870000	9970000	0.0648408	0.0314581
chr2L	22140000	22240000	0.0772586	0.0314581
chr2L	10460000	10560000	0.0630445	0.0314581
chrX	15990000	16090000	0.063454	0.0314581
chr2L	15850000	15950000	-0.0782744	0.0315413
chrX	12190000	12290000	0.0772301	0.0315413
chr2R	2310000	2410000	0.133031	0.0315413
chr3R	570000	670000	0.0785446	0.0315413
chrX	1750000	1850000	-0.0592074	0.0315413
chr2L	22010000	22110000	-0.0619824	0.0315413
chrX	11620000	11720000	0.0613409	0.0315413
chr2L	2460000	2560000	-0.0680846	0.0315413
chrX	1580000	1680000	0.0627601	0.0315413
chr3L	13200000	13300000	0.0572606	0.0315413
chr3L	25460000	25560000	0.0882776	0.0315413
chr3R	13470000	13570000	-0.080636	0.0315413
chr3R	13680000	13780000	-0.0610012	0.0316054
chr2R	15390000	15490000	0.061271	0.0317173
chr2L	3940000	4040000	0.0774031	0.0317429
chr3L	25910000	26010000	0.0615525	0.0317434
chr2L	7500000	7600000	-0.062275	0.0318017
chr3L	22710000	22810000	-0.0632285	0.0318017
chr3L	25770000	25870000	0.0803795	0.0318404
chr3L	420000	520000	-0.0620451	0.0319043
chrX	13800000	13900000	0.0622016	0.0319043
chr3R	28170000	28270000	-0.0997502	0.0319043
chr2L	6180000	6280000	-0.0620626	0.0319045
chr3R	31240000	31340000	-0.0640641	0.0319045
chr2R	25030000	25130000	-0.0640099	0.0319045
chr2R	9200000	9300000	-0.0673815	0.031998
chrX	350000	450000	0.0647131	0.0320439
chr3L	7140000	7240000	-0.0651142	0.0320819
chr2R	16610000	16710000	-0.0711658	0.0322486
chr3R	29650000	29750000	0.0641455	0.0323438
chr3L	25760000	25860000	0.0879834	0.0323438
chr3R	14400000	14500000	0.0594027	0.0323503
chr3L	26310000	26410000	-0.0848057	0.0323555
chr2R	19650000	19750000	-0.0636051	0.0323951
chr2L	800000	900000	-0.0692408	0.032427
chr3R	14690000	14790000	0.0679501	0.032427
chrX	11740000	11840000	-0.0674959	0.0324327
chr3R	21580000	21680000	0.0625547	0.0324327
chr2R	24070000	24170000	-0.0723484	0.0324327
chr2R	13500000	13600000	-0.0592922	0.0324596
chr3L	15070000	15170000	0.0627574	0.0324999
chr2R	3920000	4020000	0.0905582	0.0325027
chr3L	13810000	13910000	0.0703125	0.0325404
chr2L	11420000	11520000	-0.0596795	0.0325605
chr2L	3270000	3370000	-0.0631444	0.0326314
chrX	6760000	6860000	0.0709837	0.032633
chr2L	14750000	14850000	-0.0625856	0.0326409
chr3L	25470000	25570000	0.0846684	0.0326976
chr3L	24920000	25020000	0.0899517	0.0326976
chr3R	14080000	14180000	0.0691987	0.03272
chr3R	21960000	22060000	-0.0749179	0.0327667
chr2R	5530000	5630000	0.0718503	0.0327667
chr3L	10770000	10870000	0.0707181	0.0328373
chr3L	10930000	11030000	0.0601537	0.0329588
chr3L	2820000	2920000	0.0783302	0.0330371
chr2L	8380000	8480000	-0.0594485	0.0330874
chr3L	28040000	28110227	-0.078993	0.0330874
chr3R	6640000	6740000	-0.0671793	0.0330874
chr3L	20880000	20980000	0.0706011	0.0330874
chr3L	18290000	18390000	-0.0575627	0.0330874
chr3L	4800000	4900000	-0.0639884	0.0331167
chr3L	10360000	10460000	0.059357	0.0331462
chrX	3420000	3520000	0.0778944	0.0331462
chr2L	12440000	12540000	0.0569775	0.0331659
chrX	21860000	21960000	0.124417	0.0332455
chr3L	26330000	26430000	-0.112611	0.0333596
chr3L	5760000	5860000	-0.0634451	0.0333596
chr3R	19340000	19440000	0.072832	0.0333596
chr3R	25790000	25890000	0.0601804	0.0333596
chr2L	6930000	7030000	0.0587171	0.0334196
chr3L	15280000	15380000	0.0588032	0.0334196
chr2R	25120000	25220000	-0.058433	0.0334262
chrX	22740000	22840000	-0.0939131	0.0334262
chr3L	18090000	18190000	0.0559507	0.0334445
chr2R	600000	700000	-0.0618845	0.0334464
chrX	20740000	20840000	-0.0903341	0.0334518
chr2L	23030000	23130000	0.0771986	0.0335045
chrUn_CP007120v1	40000	76973	-0.0806556	0.0335045
chrX	14660000	14760000	-0.0966197	0.0335045
chr3L	3230000	3330000	0.0700977	0.0335059
chrX	2240000	2340000	0.0942687	0.0335775
chr2L	22230000	22330000	0.0994804	0.0335775
chr3L	19590000	19690000	-0.0591247	0.0336081
chr3L	3410000	3510000	-0.064679	0.0336081
chr3R	5890000	5990000	-0.0732561	0.0336213
chr2R	16450000	16550000	-0.060228	0.0336213
chr3L	1050000	1150000	0.0756196	0.0336711
chr3R	1580000	1680000	0.0841435	0.0337061
chr3R	24710000	24810000	-0.0823308	0.0338361
chr2L	13780000	13880000	-0.0581278	0.0338996
chr3R	26270000	26370000	-0.0660241	0.0339073
chr2L	10440000	10540000	0.0574852	0.0340311
chr3R	25010000	25110000	-0.0579513	0.0340311
chrX	15690000	15790000	0.0722212	0.0341913
chr2L	1000000	1100000	-0.0597003	0.0342027
chr3R	2270000	2370000	0.134944	0.0342139
chr3L	11550000	11650000	0.0652941	0.0342186
chr3L	24770000	24870000	0.0650823	0.0342848
chr3R	50000	150000	0.0780357	0.0342958
chr2R	7570000	7670000	-0.0602088	0.0343053
chrX	13350000	13450000	0.0669777	0.0343295
chr3R	21810000	21910000	0.0589711	0.0343614
chr3R	10270000	10370000	-0.0688615	0.0343614
chr3L	19410000	19510000	0.0666227	0.0343614
chr3L	14140000	14240000	-0.0659025	0.0343614
chr3L	20860000	20960000	0.0723137	0.034393
chr3R	25450000	25550000	0.0723548	0.034393
chr3R	21300000	21400000	-0.0588259	0.0344205
chr3L	15760000	15860000	0.0583289	0.0344205
chr3L	25750000	25850000	0.0850992	0.0345812
chr3L	27620000	27720000	0.110383	0.0346259
chrX	12210000	12310000	0.0674978	0.0346395
chrX	11240000	11340000	0.0608175	0.0347
chr2R	860000	960000	-0.059399	0.0347
chr3R	9790000	9890000	-0.0617054	0.0347
chr3L	8090000	8190000	0.0985519	0.0348049
chrX	310000	410000	0.0726264	0.0348126
chr3R	12570000	12670000	-0.0596578	0.0348364
chr2L	5500000	5600000	-0.0727253	0.034872
chr3R	10460000	10560000	0.0751185	0.034872
chr3R	14900000	15000000	0.0598469	0.034872
chr3L	7400000	7500000	-0.06863	0.034872
chr2R	9470000	9570000	0.0774339	0.034872
chr3R	24680000	24780000	-0.0722214	0.0348801
chr3R	13920000	14020000	0.0611528	0.0348801
chr3R	3080000	3180000	0.121939	0.0348801
chr3L	10790000	10890000	0.0762225	0.034922
chrX	11760000	11860000	-0.0651429	0.034922
chr3L	17180000	17280000	-0.0729348	0.034922
chr3R	16890000	16990000	-0.0540132	0.034922
chr3R	21920000	22020000	-0.0726191	0.034922
chr2R	7980000	8080000	-0.0574442	0.034922
chr2R	13020000	13120000	0.0639536	0.0349514
chr2L	7540000	7640000	-0.0710244	0.0350748
chrX	2210000	2310000	0.0966984	0.0351459
chr3R	3270000	3370000	0.0579497	0.0352138
chr3L	11580000	11680000	0.0650112	0.0352244
chr3L	16040000	16140000	0.0621114	0.0352244
chrX_DS483851v1_random	0	4395	-0.205848	0.0352244
chr3L	15120000	15220000	0.0631274	0.0352641
chr3L	11680000	11780000	-0.0591195	0.0352641
chr2L	22190000	22290000	0.10095	0.0352641
chr3L	17210000	17310000	-0.0637162	0.0352641
chr3R	29780000	29880000	0.0569096	0.0352641
chrX	11910000	12010000	0.0900092	0.0352641
chr3L	18870000	18970000	0.0680935	0.0352641
chrX	20540000	20640000	-0.0893575	0.0353038
chr3L	350000	450000	-0.0655876	0.0353423
chr3L	19400000	19500000	0.068083	0.0353423
chr4	1180000	1280000	0.0721448	0.0353499
chr2R	4010000	4110000	0.071257	0.0353747
chrX	17500000	17600000	0.0735992	0.0353747
chr3L	17120000	17220000	-0.0731144	0.0354306
chr3R	15730000	15830000	0.0890008	0.0354306
chr2R	9910000	10010000	0.0656918	0.0354306
chr2R	15430000	15530000	0.0690764	0.0354309
chr3L	3000000	3100000	-0.0658348	0.0356139
chr3L	25560000	25660000	0.0936878	0.0356139
chr2L	8180000	8280000	-0.0572405	0.0356139
chr2R	4150000	4250000	0.0826724	0.0356795
chr3R	910000	1010000	0.102503	0.0356795
chr3L	8940000	9040000	-0.0630737	0.0356973
chr3R	17770000	17870000	0.0571788	0.0356973
chr2R	20830000	20930000	-0.0803396	0.0356982
chr2L	11410000	11510000	-0.0575553	0.0358204
chr3R	24690000	24790000	-0.0675887	0.0358204
chr3L	26580000	26680000	0.100362	0.0358798
chr4	700000	800000	0.0780703	0.0358798
chr2R	20210000	20310000	-0.0570311	0.0358798
chr2L	480000	580000	-0.0667571	0.0358798
chr3R	6510000	6610000	-0.0611932	0.0358798
chrX	11190000	11290000	0.0864217	0.0358997
chr3R	1320000	1420000	0.0892516	0.0358997
chr2L	11500000	11600000	-0.0887191	0.0358997
chrX	3650000	3750000	0.0644174	0.0359545
chr3L	15190000	15290000	0.0610336	0.0359545
chr3R	3770000	3870000	0.0569681	0.0359545
chr2L	20970000	21070000	-0.058323	0.0359971
chr2L	20860000	20960000	-0.0569676	0.0359971
chr3L	3700000	3800000	-0.0565816	0.0359976
chr3L	25570000	25670000	0.0815024	0.0362557
chr2R	2120000	2220000	-0.0790146	0.0362557
chr2R	8260000	8360000	-0.0782144	0.0362557
chr3L	14660000	14760000	0.0543618	0.0362922
chr2L	12430000	12530000	0.059935	0.0363442
chr2R	7050000	7150000	-0.0707711	0.0363442
chr3R	3690000	3790000	0.0597441	0.0363681
chr2L	13740000	13840000	-0.0566	0.0363708
chr3R	21590000	21690000	0.0671615	0.0363983
chr2R	16470000	16570000	-0.0552199	0.036438
chr2R	17780000	17880000	-0.067332	0.036438
chr3R	31370000	31470000	0.0671725	0.0364622
chr3L	6230000	6330000	0.084867	0.0364889
chrX	19270000	19370000	0.0549443	0.0364889
chr3L	20980000	21080000	0.0624039	0.0365137
chr2R	20850000	20950000	-0.0724986	0.0365137
chr3L	11700000	11800000	-0.0576387	0.0365489
chr3R	23710000	23810000	-0.0613433	0.0365489
chr2R	2110000	2210000	-0.0685758	0.0365489
chr3L	17230000	17330000	-0.0638738	0.036613
chr2L	23010000	23110000	0.0620496	0.036613
chrX	7070000	7170000	0.0682789	0.036613
chr2R	17760000	17860000	-0.0713468	0.036613
chr3R	14850000	14950000	0.0597643	0.0366271
chr3R	28150000	28250000	-0.0838445	0.0366271
chr3L	16030000	16130000	0.0577896	0.0366499
chr2L	11660000	11760000	-0.080794	0.0366499
chr3R	14870000	14970000	0.0593712	0.0366908
chr3L	12050000	12150000	0.0615087	0.0367461
chr2R	24050000	24150000	-0.0657592	0.036756
chr3L	15540000	15640000	0.0581788	0.0368551
chr3L	26350000	26450000	-0.0992538	0.0368761
chr2L	4500000	4600000	-0.0614248	0.0369347
chr3R	12850000	12950000	0.0746146	0.0369347
chr3L	2750000	2850000	0.090032	0.0369365
chr3L	25540000	25640000	0.0731755	0.0369365
chrX	8680000	8780000	-0.0766646	0.0369447
chr2L	14440000	14540000	0.0591447	0.0370253
chr3R	15820000	15920000	0.0585759	0.0370715
chr2L	11360000	11460000	-0.0561975	0.0370715
chr2R	14480000	14580000	-0.0703158	0.0371077
chrX	3100000	3200000	-0.0889956	0.0372138
chr2L	12250000	12350000	-0.059946	0.0372138
chr3L	6290000	6390000	0.0608906	0.0372138
chr3R	6110000	6210000	-0.0556629	0.0373211
chr3R	7580000	7680000	-0.055846	0.0375202
chr3R	25200000	25300000	-0.0546172	0.0375202
chr2L	21810000	21910000	0.0775209	0.0375202
chr2R	3040000	3140000	0.0854053	0.0376105
chr3R	9310000	9410000	0.0527892	0.0376559
chrX	23430000	23530000	-0.0728556	0.0377294
chr2R	13490000	13590000	-0.0602185	0.0377294
chr2L	20010000	20110000	-0.0552571	0.0377491
chr3R	22420000	22520000	-0.074053	0.0377491
chrX	11160000	11260000	0.0792229	0.0377491
chr3L	25280000	25380000	-0.0792991	0.0377491
chr3R	21350000	21450000	-0.0563267	0.0377491
chr3R	7600000	7700000	-0.0564835	0.0377834
chrX	3370000	3470000	0.0651677	0.0379366
chr2R	6410000	6510000	-0.0721826	0.037954
chrX	19040000	19140000	0.0709553	0.0380399
chr3L	4780000	4880000	-0.0544594	0.0380399
chr3R	1860000	1960000	0.0637786	0.038079
chr3R	17800000	17900000	0.0573475	0.038079
chr2R	22340000	22440000	0.0589667	0.038079
chr2L	20220000	20320000	-0.0540956	0.038079
chrX	11400000	11500000	0.0816895	0.038079
chr2L	16640000	16740000	-0.0561021	0.038079
chr2L	15910000	16010000	-0.0884168	0.038146
chr3R	4170000	4270000	0.0632946	0.0382704
chr3L	4590000	4690000	-0.0675243	0.038318
chr2R	50000	150000	-0.091321	0.038415
chrX	13340000	13440000	0.0654805	0.038415
chrX	12200000	12300000	0.0659852	0.038415
chr3L	23550000	23650000	-0.0688533	0.038415
chrX	19970000	20070000	-0.0665848	0.0384953
chr3L	11570000	11670000	0.0724153	0.0384969
chr2R	17000000	17100000	-0.0654337	0.0384969
chr2L	11610000	11710000	-0.0610209	0.0385943
chr3R	16660000	16760000	-0.0652132	0.0386737
chr2L	23430000	23513712	-0.0834688	0.0387609
chr3L	19370000	19470000	0.0576484	0.0388039
chr2L	21930000	22030000	-0.0559621	0.0388039
chr3R	22510000	22610000	-0.0801442	0.0388761
chr2R	8600000	8700000	-0.0585849	0.0388761
chr3L	12620000	12720000	0.0695965	0.0389097
chr2L	3980000	4080000	0.06987	0.0389409
chrX	12030000	12130000	0.0683718	0.0390086
chr2R	20770000	20870000	-0.0801112	0.0390874
chr2L	10590000	10690000	-0.074732	0.0391178
chr2L	22120000	22220000	0.0620044	0.0391278
chr3R	11870000	11970000	0.0587829	0.0391468
chr2L	5660000	5760000	-0.0664322	0.0391468
chr3L	13310000	13410000	-0.0676359	0.0391668
chr3R	21950000	22050000	-0.0712698	0.0392289
chr2R	510000	610000	-0.0707168	0.0394765
chr3L	15610000	15710000	0.05334	0.0394768
chrX	5520000	5620000	-0.0698172	0.0394768
chr3R	26260000	26360000	-0.0621009	0.0394768
chr3R	28040000	28140000	-0.0661617	0.0394768
chr3L	3010000	3110000	-0.0681431	0.0394768
chr3L	6990000	7090000	0.0704185	0.0394977
chr3L	9100000	9200000	-0.0621744	0.0395556
chr3R	19820000	19920000	-0.0572653	0.0396493
chr2L	18220000	18320000	0.0719153	0.0396493
chr2R	420000	520000	-0.0602914	0.03965
chr3R	25430000	25530000	0.0667563	0.0397165
chrY	3570000	3667352	-0.202863	0.0397165
chr2L	12720000	12820000	-0.0637969	0.0397165
chr3L	1040000	1140000	0.0795234	0.0397414
chr2R	4140000	4240000	0.0876052	0.039817
chr3R	10380000	10480000	0.0587043	0.0398482
chrUn_CP007081v1	30000	88768	-0.0660515	0.0399117
chr3L	28030000	28110227	-0.0704491	0.0399117
chr2R	9740000	9840000	-0.0644352	0.0399117
chrX	23370000	23470000	-0.0953395	0.0399327
chr3L	20990000	21090000	0.0679	0.0399327
chr3L	20340000	20440000	-0.0541514	0.0399926
chr3L	9960000	10060000	-0.0685556	0.0400808
chr2L	1780000	1880000	-0.0613265	0.040147
chr3L	23560000	23660000	-0.0562214	0.0401696
chr3L	11690000	11790000	-0.057542	0.0402381
chr2L	15860000	15960000	-0.0756564	0.0402381
chrX	21750000	21850000	0.0935763	0.040277
chr3L	360000	460000	-0.0686183	0.040277
chr2L	17820000	17920000	-0.0907366	0.0402993
chr3R	26900000	27000000	-0.0541034	0.0402993
chrX	12220000	12320000	0.0648883	0.0402993
chr3L	26340000	26440000	-0.109201	0.0402993
chr3R	13410000	13510000	-0.0657721	0.0403089
chr3R	16650000	16750000	-0.0575013	0.0405475
chr3R	3700000	3800000	0.0574786	0.0405773
chr2L	16100000	16200000	-0.099619	0.0406026
chr2R	22620000	22720000	0.0561835	0.0407537
chr2R	70000	170000	-0.0905986	0.0407537
chr2R	15380000	15480000	0.0571728	0.0407537
chrX	12730000	12830000	0.0611619	0.0407537
chr2R	22670000	22770000	0.0529669	0.0407537
chr3L	1690000	1790000	-0.063548	0.0407537
chr3L	13210000	13310000	0.0570297	0.0407612
chrX	5730000	5830000	-0.0793479	0.0407612
chr3R	10440000	10540000	0.0580595	0.0407612
chr3L	18300000	18400000	-0.053382	0.0407612
chrX	20130000	20230000	-0.11012	0.0408083
chrUn_CP007120v1	30000	76973	-0.0821534	0.0410451
chr2L	8170000	8270000	-0.0577942	0.0411337
chr2R	19880000	19980000	0.0629006	0.0411337
chr3R	13400000	13500000	-0.0665621	0.0411542
chr3R	29180000	29280000	0.0558883	0.0412277
chr3R	740000	840000	0.0799899	0.041274
chr2R	4650000	4750000	0.0652867	0.0413015
chr3R	28420000	28520000	-0.0554546	0.04152
chr2R	10220000	10320000	-0.0605903	0.0415875
chr2R	15470000	15570000	0.0678936	0.0415875
chr3R	7690000	7790000	-0.06892	0.0415875
chr3R	25070000	25170000	-0.0533767	0.0416688
chr3R	29550000	29650000	-0.0559033	0.0416955
chr3R	3610000	3710000	-0.0802177	0.0416955
chr3R	23960000	24060000	0.0593355	0.0417117
chr2L	23150000	23250000	0.0593287	0.0417117
chrX	19980000	20080000	-0.0806823	0.0417857
chr2L	1790000	1890000	-0.0546767	0.0418602
chrX	23190000	23290000	-0.0789912	0.041863
chr2L	15890000	15990000	-0.0789447	0.0418706
chr3R	9340000	9440000	0.0585557	0.0418706
chrX	2200000	2300000	0.0864009	0.0418706
chr3L	5770000	5870000	-0.0631167	0.0418963
chrX	12710000	12810000	0.0693726	0.0419443
chr3R	15740000	15840000	0.0804075	0.0420278
chrX	6950000	7050000	0.0609724	0.0420611
chrX	3820000	3920000	-0.0730644	0.042171
chrX	11170000	11270000	0.0741918	0.0423453
chr3L	2740000	2840000	0.0941405	0.0424995
chr3L	15580000	15680000	0.0567733	0.0425058
chr3R	22850000	22950000	-0.0596702	0.0425447
chr3R	28800000	28900000	-0.0559841	0.0425699
chr2L	10680000	10780000	-0.0823639	0.0425829
chr3L	15270000	15370000	0.0531788	0.0425829
chr2R	18760000	18860000	-0.0726649	0.0426173
chr3L	5740000	5840000	-0.0574366	0.0426351
chr2R	3030000	3130000	0.0786713	0.0427096
chr3R	30360000	30460000	-0.0518677	0.0427096
chr3L	9970000	10070000	-0.0733889	0.0427102
chr2R	9770000	9870000	-0.0677116	0.0427329
chrX	12770000	12870000	0.0568311	0.0427435
chr2L	4290000	4390000	-0.0523233	0.0427435
chr3R	28830000	28930000	-0.0631257	0.0428236
chr2L	22240000	22340000	0.0841525	0.0428236
chr3R	5680000	5780000	-0.0538726	0.0428236
chr3R	13420000	13520000	-0.0605646	0.0428874
chr3L	28020000	28110227	-0.067888	0.0429116
chrX	18920000	19020000	0.0882044	0.0429116
chr3L	7500000	7600000	-0.0655064	0.0429116
chr3L	20620000	20720000	0.0561566	0.0429116
chr2R	2550000	2650000	-0.0766416	0.0429116
chr3L	25550000	25650000	0.0686311	0.0429116
chr2L	13700000	13800000	-0.0540665	0.0429116
chr2L	3530000	3630000	-0.0604303	0.0429116
chr3R	21660000	21760000	0.0550448	0.0429116
chr2R	820000	920000	-0.104859	0.0429116
chr3R	20160000	20260000	0.0620718	0.0429116
chrX	3080000	3180000	-0.0867333	0.0429116
chrX	11000000	11100000	0.0578122	0.0429118
chrX	14650000	14750000	-0.0822708	0.0429158
chr3R	3530000	3630000	-0.0770041	0.042928
chr3R	770000	870000	0.0832055	0.042928
chr3R	28920000	29020000	-0.0568717	0.0429717
chr3R	14730000	14830000	0.0562117	0.0429956
chrX	6140000	6240000	0.0678583	0.0429956
chr2L	3570000	3670000	-0.0607284	0.0429956
chr3R	21820000	21920000	0.0521724	0.0429956
chrX	21890000	21990000	0.109059	0.0429956
chr2L	18370000	18470000	0.0583048	0.0430184
chrX	15550000	15650000	0.0759087	0.0432044
chr2L	6360000	6460000	-0.0776433	0.0432982
chr2R	14850000	14950000	-0.0563283	0.0433355
chr3L	27170000	27270000	0.0639024	0.0433355
chr2L	7520000	7620000	-0.064296	0.0433361
chr3R	6230000	6330000	-0.0590783	0.0433816
chr2L	1830000	1930000	-0.0520403	0.0435373
chr2L	820000	920000	-0.0641907	0.0435513
chr2L	20000000	20100000	-0.0573104	0.0435755
chrX	6750000	6850000	0.0581077	0.0436064
chr3L	25050000	25150000	0.0666485	0.0436932
chr3L	430000	530000	-0.0522656	0.0437121
chr2L	15880000	15980000	-0.0843943	0.0437121
chr3R	12610000	12710000	-0.0562601	0.0437121
chr3R	5020000	5120000	0.0788283	0.0437233
chrX	14600000	14700000	-0.0658059	0.0437233
chr2L	7710000	7810000	0.0606899	0.043818
chr2L	4220000	4320000	-0.0655342	0.0438506
chrX	1990000	2090000	0.0719492	0.0439504
chr3R	23330000	23430000	-0.0550895	0.0439681
chrX	11530000	11630000	0.0678506	0.043972
chr3L	11930000	12030000	0.0573675	0.0439899
chr3R	25080000	25180000	-0.0545013	0.0439899
chr3R	13380000	13480000	-0.059481	0.0439899
chr3L	27090000	27190000	-0.0569476	0.0440084
chr2L	7480000	7580000	-0.0582591	0.0440344
chr3R	13720000	13820000	-0.0553658	0.0440344
chr3R	16840000	16940000	-0.0631937	0.0440344
chrX	14620000	14720000	-0.0745714	0.044066
chr3R	20200000	20300000	0.0770573	0.044066
chr2R	19510000	19610000	-0.0636302	0.0440958
chr3L	6220000	6320000	0.079395	0.0440958
chr2L	6390000	6490000	-0.0591575	0.0440958
chr3L	6270000	6370000	0.0716648	0.0440958
chr2L	20440000	20540000	0.0567042	0.0440958
chr3R	17820000	17920000	0.0545631	0.0441082
chr2R	2530000	2630000	-0.0851336	0.0442201
chrX	5190000	5290000	0.0567019	0.04427
chr3R	20510000	20610000	-0.0579871	0.0442878
chrY	1620000	1720000	-0.179241	0.0443009
chr3R	11860000	11960000	0.0595769	0.044367
chr2L	17120000	17220000	0.0531118	0.0443722
chr3L	3050000	3150000	-0.0575722	0.0443722
chr2L	1170000	1270000	0.0589067	0.0443804
chr3R	28810000	28910000	-0.0518412	0.0443932
chr2R	20840000	20940000	-0.0773739	0.044394
chr3R	25710000	25810000	0.0587342	0.0444524
chr2R	1220000	1320000	0.0667474	0.0445855
chr2R	9460000	9560000	0.0710496	0.0447026
chr3R	21100000	21200000	0.0629058	0.0447458
chr3L	18280000	18380000	-0.0551911	0.0447723
chr3L	12710000	12810000	-0.0561235	0.0447723
chr2L	18130000	18230000	0.0573898	0.0448268
chrX	2250000	2350000	0.0833674	0.044878
chr2L	10950000	11050000	0.067295	0.0448803
chr3R	14450000	14550000	0.0546609	0.0448806
chr2R	5860000	5960000	-0.0513053	0.0448806
chr3L	15970000	16070000	0.0521174	0.0449044
chr3R	30620000	30720000	-0.0529638	0.0449096
chr2R	22860000	22960000	0.051772	0.0449096
chr2R	18970000	19070000	-0.0552683	0.0449381
chr3L	20570000	20670000	0.0526865	0.0449381
chr3R	12860000	12960000	0.0758356	0.0450271
chr3L	20630000	20730000	0.0564718	0.0450271
chr3L	3840000	3940000	-0.0609155	0.0450752
chrX	3390000	3490000	0.0629492	0.0451044
chr3R	12840000	12940000	0.0756168	0.0451044
chr2R	19600000	19700000	-0.0525588	0.0451803
chr2L	19880000	19980000	-0.0614416	0.0451803
chr3L	7420000	7520000	-0.064577	0.0451803
chr2R	5180000	5280000	0.0631051	0.0452085
chr3R	13130000	13230000	-0.0567707	0.0452085
chr2L	19340000	19440000	-0.0528606	0.0452085
chr3L	11960000	12060000	0.0687655	0.0452434
chr3L	10010000	10110000	-0.064451	0.0452561
chr3L	20320000	20420000	-0.0536449	0.0452576
chr3L	7080000	7180000	-0.0598208	0.0452576
chrX	9230000	9330000	-0.0544459	0.0453693
chrX	19280000	19380000	0.0511288	0.0453693
chrX	800000	900000	0.0646293	0.0455294
chr3R	12560000	12660000	-0.0589131	0.0455418
chr2R	14460000	14560000	-0.0716073	0.0456033
chrX	18830000	18930000	0.056571	0.0456083
chr3R	10400000	10500000	0.0582813	0.0456084
chrX	21780000	21880000	0.0943865	0.0456084
chr3R	22050000	22150000	-0.0571819	0.0457966
chr4	640000	740000	0.0713753	0.0457966
chrX	2230000	2330000	0.0895514	0.0457966
chr3L	19110000	19210000	0.0592857	0.0458426
chr3R	2540000	2640000	0.0706193	0.0458615
chr2R	2350000	2450000	0.154336	0.0458864
chrX	23390000	23490000	-0.0740593	0.0459706
chr2L	15430000	15530000	-0.052212	0.0459706
chr2R	22350000	22450000	0.0540671	0.04603
chr3R	25970000	26070000	0.0533643	0.0460959
chr3R	28320000	28420000	0.0569429	0.0460959
chrX	20560000	20660000	-0.07193	0.0461181
chr3R	17700000	17800000	-0.0527176	0.0461201
chr3L	15290000	15390000	0.056327	0.0461268
chr2L	9260000	9360000	0.0575225	0.0461685
chr3R	27030000	27130000	0.0639998	0.0461788
chr3R	15790000	15890000	0.0658171	0.0461788
chrX	3400000	3500000	0.0677597	0.0461788
chr2R	19920000	20020000	0.0618578	0.0463201
chr3R	10260000	10360000	-0.0672125	0.0463201
chr3R	15750000	15850000	0.07084	0.0464055
chr3R	22780000	22880000	-0.0747158	0.0464759
chr3R	3240000	3340000	-0.063051	0.0464759
chr3L	7160000	7260000	-0.0585191	0.0464759
chr3R	31210000	31310000	-0.0594638	0.0464759
chr3L	13190000	13290000	0.0565573	0.0465347
chrX	3780000	3880000	-0.0647855	0.0465347
chr3R	13500000	13600000	-0.0929987	0.0465347
chr3L	8960000	9060000	-0.0627885	0.0465347
chrX	20630000	20730000	-0.0807939	0.0466177
chr2L	20450000	20550000	0.0548095	0.0466177
chrX	13830000	13930000	0.0635286	0.0466505
[truncated: 11,501 more rows]
