# Supplementary material for: Chromatin conformation and transcriptional activity are permissive regulators of DNA replication initiation in Drosophila
Source: HighWire-hosted journal article supplement (doi:10.1101/gr.239913.118), 2018-10-02
Supplement: Supplemental_File_S2.xlsx [file Supplemental_File_S2.xlsx]

## Sheet: Armstrong_File_S2
File_S2. Cuffdiff determined differential expression analysis of replication associated factors between H3K9R and control.
gene_id	locus	sample_1	sample_2	status	value_1	value_2	log2.fold_change.	p_value	q_value	significant
ago	chr3L:4246342-4254306	K9R	WT	OK	59.0664	78.7056	0.414129	0.19355	0.695094	no
Btk29A	chr2L:8258754-8301079	K9R	WT	OK	111.567	133.357	0.257378	0.44425	0.950748	no
Caf1-180	chrX:8496169-8500337	K9R	WT	OK	22.1067	31.0267	0.489023	0.1331	0.590242	no
CDC45L	chrX:906811-940075	K9R	WT	OK	22.9778	31.461	0.453328	0.50095	0.981623	no
chif	chr2L:16342425-16352600	K9R	WT	OK	36.6468	44.4752	0.279316	0.4236	0.94047	no
Claspin	chr3L:4313482-4318473	K9R	WT	OK	12.1799	23.2157	0.930596	0.0075	0.14325	no
Ctf4	chr2R:9867866-9870979	K9R	WT	OK	14.8569	14.7678	-0.00868208	0.9824	0.998228	no
CycA	chr3L:11819818-11826678	K9R	WT	OK	103.245	206.204	0.997996	0.0159	0.204526	no
CycB	chr2R:18691025-18694490	K9R	WT	OK	117.034	169.488	0.534251	0.1219	0.56864	no
CycE	chr2L:15727761-15748155	K9R	WT	OK	31.333	40.7031	0.377452	0.26575	0.795576	no
DNA-ligI	chr2R:19778060-19782510	K9R	WT	OK	20.7777	21.301	0.0358802	0.93555	0.998228	no
DNApol-alpha180	chr3R:17490110-17497472	K9R	WT	OK	27.0813	28.022	0.0492622	0.87545	0.998228	no
DNApol-alpha50	chr3L:8333413-8337504	K9R	WT	OK	10.0817	13.283	0.397847	0.55125	0.998228	no
DNApol-alpha60	chr3L:20352932-20354685	K9R	WT	OK	14.4721	16.6967	0.206288	0.635	0.998228	no
DNApol-delta	chr3L:15976234-15980915	K9R	WT	OK	19.7968	19.6405	-0.0114332	0.97695	0.998228	no
dpa	chr2R:3384206-3387382	K9R	WT	OK	56.2917	55.7413	-0.0141761	0.9646	0.998228	no
Dref	chr2L:9964146-9968619	K9R	WT	OK	56.3806	68.9421	0.290185	0.8471	0.998228	no
Dsor1	chrX:9141374-9144070	K9R	WT	OK	23.0384	21.3851	-0.107431	0.78345	0.998228	no
dup	chr2R:11264123-11275356	K9R	WT	OK	19.8545	26.4969	0.416358	0.5685	0.998228	no
E2f2	chr2L:21154292-21156232	K9R	WT	OK	31.6798	49.604	0.646892	0.0669	0.423374	no
esg	chr2L:15333863-15336140	K9R	WT	OK	30.9564	44.5625	0.525595	0.1117	0.544033	no
fkh	chr3R:24406804-24410834	K9R	WT	OK	1.99162	0.71354	-1.48087	0.0864	0.484926	no
fs(1)Ya	chrX:2618318-2620614	K9R	WT	OK	0.0748503	2.419	5.01426	0.0063	0.132953	no
geminin	chr2R:2542967-2543955	K9R	WT	OK	84.365	112.191	0.411246	0.2206	0.733736	no
gnu	chr3L:14795479-14796460	K9R	WT	OK	0.0778039	17.733	7.83238	0.05685	0.389104	no
grp	chr2L:16680053-16699926	K9R	WT	OK	171.312	201.94	0.237294	0.51345	0.983736	no
hd	chr3R:1198313-1200356	K9R	WT	OK	6.84276	5.83607	-0.229582	0.70945	0.998228	no
Marcal1	chr2L:4955508-4958292	K9R	WT	OK	8.30248	10.1146	0.284831	0.54435	0.99428	no
Mcm10	chr2L:21179940-21198745	K9R	WT	OK	15.7559	22.0446	0.484539	0.18525	0.683354	no
Mcm2	chr3R:4090564-4093653	K9R	WT	OK	47.2242	40.7076	-0.214226	0.48895	0.977453	no
Mcm5	chr3R:6614249-6616872	K9R	WT	OK	44.2513	46.2516	0.0637853	0.8353	0.998228	no
Mcm6	chrX:6568421-6571205	K9R	WT	OK	63.1854	56.0115	-0.173869	0.57435	0.998228	no
Mcm7	chr3L:8884695-8887410	K9R	WT	OK	67.2458	67.0984	-0.00316543	0.9917	0.998228	no
mei-41	chrX:16285793-16293601	K9R	WT	OK	13.8152	10.3578	-0.415546	0.1941	0.696137	no
mus101	chrX:13616278-13621146	K9R	WT	OK	16.4	14.8308	-0.145093	0.65275	0.998228	no
mus304	chr3L:18102913-18105947	K9R	WT	OK	10.2075	10.2225	0.00211855	0.9959	0.998752	no
nej	chrX:9559474-9581099	K9R	WT	OK	36.674	44.1064	0.266231	0.4896	0.977552	no
Orc1	chr2R:3406784-3413221	K9R	WT	OK	12.0579	16.9172	0.488516	0.35385	0.887938	no
Orc2	chr3R:9790606-9857779	K9R	WT	OK	13.1822	12.0518	-0.129342	0.902	0.998228	no
Orc4	chr2R:20681329-20684927	K9R	WT	OK	18.0713	17.5576	-0.0415987	0.92855	0.998228	no
Orc5	chr2L:13829856-13833167	K9R	WT	OK	16.369	16.2051	-0.014512	0.97845	0.998228	no
Orc6	chr2R:5730191-5733964	K9R	WT	OK	8.01468	13.4362	0.745406	0.4254	0.941923	no
otu	chrX:8379040-8411062	K9R	WT	OK	0.135198	18.8885	7.12629	0.0216	0.239819	no
Pdp1	chr3L:7805014-7860469	K9R	WT	OK	10.9232	14.2251	0.381041	0.33485	0.86852	no
pita	chr2R:19435762-19442241	K9R	WT	OK	36.572	38.3932	0.0701111	0.90365	0.998228	no
plu	chr2R:16150462-16151224	K9R	WT	OK	0.271609	2.33525	3.10397	0.09505	0.508894	no
Psf1	chr3L:1246985-1247677	K9R	WT	OK	13.8282	10.1144	-0.451198	0.53855	0.992651	no
Psf2	chr2L:4386181-4387356	K9R	WT	OK	16.0145	17.1095	0.09542	0.87415	0.998228	no
Psf3	chrX:10277385-10279182	K9R	WT	OK	13.9246	18.2744	0.392193	0.44205	0.950279	no
Rbf	chrX:691120-695490	K9R	WT	OK	28.612	42.8041	0.581128	0.0729	0.440157	no
rec	chr3R:11629969-11658354	K9R	WT	OK	12.588	8.62	-0.546285	0.44545	0.950748	no
RecQ4	chr3L:8163739-8169078	K9R	WT	OK	8.99993	12.4826	0.471928	0.1825	0.678363	no
RfC3	chr2L:10419189-10420612	K9R	WT	OK	28.8406	24.275	-0.24863	0.57745	0.998228	no
RfC38	chr2L:11122563-11130645	K9R	WT	OK	33.0217	33.3321	0.0134949	0.98275	0.998228	no
RfC4	chr3L:4134859-4136038	K9R	WT	OK	76.1042	81.8126	0.104347	0.74435	0.998228	no
Rif1	chr2R:11751811-11756650	K9R	WT	OK	21.0744	18.4973	-0.188182	0.55555	0.998228	no
RpA-70	chr3R:4087841-4090171	K9R	WT	OK	83.734	100.784	0.267377	0.38745	0.916631	no
Sld5	chr3R:21881378-21882269	K9R	WT	OK	18.3862	18.8609	0.0367751	0.94925	0.998228	no
ssp	chr3L:12111356-12112889	K9R	WT	OK	34.1084	47.6818	0.483308	0.1778	0.670613	no
SuUR	chr3L:11058090-11062125	K9R	WT	OK	7.13778	10.8225	0.600483	0.14215	0.610427	no
tam	chr2L:13823979-13827772	K9R	WT	OK	12.2318	9.61302	-0.347577	0.37015	0.903257	no
wg	chr2L:7307160-7316265	K9R	WT	OK	62.402	82.9312	0.410323	0.19855	0.700096	no
WRNexo	chr3R:14187715-14191898	K9R	WT	OK	21.503	29.6724	0.464581	0.24605	0.768074	no
DNApol-eta	chr3L:21927803-21934912	K9R	WT	OK	12.2386	17.9814	0.555066	0.1336	0.590595	no
DNApol-iota	chr3R:4059228-4066237	K9R	WT	OK	19.2704	18.9803	-0.0218813	0.968	0.998228	no
cdc2	chr2L:10384738-10386262	K9R	WT	OK	142.003	160.354	0.175338	0.5658	0.998228	no
cdc2c	chr3R:16561344-16564744	K9R	WT	OK	48.8076	63.6311	0.382627	0.284	0.814904	no
cdc7	chrX:6,548,574..6,553,742	K9R	WT	OK	10.3922	18.9356	0.865603	0.03615	0.313449	no
dap	chr2R:5599828-5603607	K9R	WT	OK	63.8	79.3395	0.314483	0.3243	0.859508	no
DNApol-epsilon	chr3R:19173849-19180885	K9R	WT	OK	15.6929	13.3256	-0.235908	0.4518	0.954826	no
DNApol-alpha73	chr3R:23064884-23066950	K9R	WT	OK	13.9458	14.1472	0.0206936	0.9589	0.998228	no
poly	chr3R:9187537-9194813	K9R	WT	OK	48.335	49.7969	0.0429887	0.9136	0.998228	no
E2f	chr3R:17446025-17486161	K9R	WT	OK	59.5687	105.708	0.827461	0.047	0.346997	no
fzr2	chr2R:19836723-19839982	K9R	WT	OK	2.82858	2.31506	-0.289025	0.84475	0.998228	no
lat/orc3	chr2R:9090232-9094027	K9R	WT	OK	7.37997	7.52313	0.027717	0.9556	0.998228	no
mus209	chr2R:16149258-16150362	K9R	WT	OK	138.004	134.627	-0.0357348	0.9137	0.998228	no
RPA2	chr2L:20924974-20926147	K9R	WT	OK	67.7025	67.1185	-0.0124973	0.97	0.998228	no
skpA	chrX:550104-551932	K9R	WT	OK	276.493	475.99	0.783686	0.02805	0.275615	no
kar	chr3R:8507907-8515089	K9R	WT	OK	3.6081	3.5105	-0.0395631	0.95775	0.998228	no
stg	chr3R:25077547-25081522	K9R	WT	OK	51.3968	99.9344	0.959302	0.0139	0.190547	no
