# Supplementary material for: Chromatin conformation and transcriptional activity are permissive regulators of DNA replication initiation in Drosophila
Source: HighWire-hosted journal article supplement (doi:10.1101/gr.239913.118), 2018-10-02
Supplement: Supplemental_File_S3.xlsx [file Supplemental_File_S3.xlsx]

## Sheet: Armstrong_File_S3
File_S3. Comparison of HP1a ChIP-seq, FAIRE-seq, replication timing, and RNA-seq at 10kb windows across the genome between H3K9R and control.
chromosome	start	stop	HP1_FoldChange	HP1_AdjP	HP1_Exp	FAIRE_FoldChange	FAIRE_AdjP	FAIRE_Exp	RT_FoldChange	RT_AdjP	RNA_FoldChange	RNA_AdjP	RNA_Exp
chr2L	0	10000	0.37486	1.39e-05	13.6252	-1.40332	3.09e-48	6.25284	0.0318348	0.298215	0.629441	0.177544	8.92946
chr2L	10000	20000	0.0282751	0.726434	12.4078	-0.449141	0.00102326	5.47053	0.0306472	0.300403	0.629441	0.177544	8.92946
chr2L	20000	30000	0.108056	0.0785977	12.4337	-0.217311	0.0315849	5.57792	0.0294596	0.30259	-2.10468	0.029448	-1.89661
chr2L	30000	40000	-0.105779	0.0543951	12.5618	0.228798	0.00398559	6.26624	0.0239506	0.404173	-1.2921	0.035665	2.75687
chr2L	40000	50000	0.0887199	0.223802	12.7805	-0.311561	0.000161386	6.17314	0.0184417	0.505755	-0.511197	0.281206	5.39722
chr2L	50000	60000	0.0247338	0.719544	12.6225	-0.0829478	0.320376	6.31823	0.00557915	0.535001	-0.511197	0.281206	5.39722
chr2L	60000	70000	0.0318119	0.599168	12.4176	-0.0190435	0.824706	6.06847	-0.00728338	0.559883	0.782529	0.072217	6.04917
chr2L	70000	80000	-0.0129895	0.823814	12.422	0.159929	0.151319	6.54641	-0.00483419	0.562065	0.782529	0.072217	6.04917
chr2L	80000	90000	-0.00183475	0.987026	12.4038	0.10075	0.272142	6.35123	-0.002385	0.564246	0.698507	0.107344	6.18757
chr2L	90000	100000	-0.00107761	0.994701	12.4842	0.0195437	0.812081	6.09798	-0.00483419	0.604328	1.46183	0.06926	-1.00021
chr2L	100000	110000	0.0185367	0.711092	12.5388	0.149004	0.164205	6.4554	-0.00853932	0.604328	1.23617	0.030575	4.53857
chr2L	110000	120000	0.0289477	0.609051	12.4074	0.0424029	0.640621	5.87723	-0.0117	0.604328	0.811223	0.077279	7.6041
chr2L	120000	130000	-0.0556841	0.264852	12.5098	0.213041	0.0296036	6.38443	-0.0142479	0.604328	-0.690938	0.495603	1.91482
chr2L	130000	140000	-0.0718064	0.142	12.4406	0.10014	0.253368	6.05106	-0.0123432	0.604328	3.66312	0.199167	-4.36453
chr2L	140000	150000	-0.152217	0.0171641	12.567	0.227244	0.0342072	6.4581	-0.00928611	0.675499	0.545947	0.207258	4.80976
chr2L	150000	160000	-0.163315	0.000967062	12.4662	0.113101	0.164798	6.23473	-0.00974923	0.66898	0.5591	0.195371	5.62887
chr2L	160000	170000	0.116538	0.044856	12.3227	0.269361	0.040315	7.23944	-0.00924008	0.700069	0.913446	0.150494	2.08382
chr2L	170000	180000	0.169263	0.0267452	12.311	-0.879532	0.00775888	5.09135	-0.00974923	0.66898	1.1497	0.102247	2.05816
chr2L	180000	190000	-0.0927646	0.104004	12.581	0.235572	0.0211514	6.38822	-0.0123432	0.61704	0.879076	0.169977	2.34396
chr2L	190000	200000	-0.172848	0.0280835	12.6827	0.188373	0.0222152	6.21561	-0.0163305	0.503521	0.319269	0.456917	9.27175
chr2L	200000	210000	-0.118808	0.0247649	12.481	-0.0011374	0.994257	6.01841	-0.0163305	0.503521	0.668802	0.144569	4.41405
chr2L	210000	220000	-0.0971729	0.0868349	12.5678	0.140708	0.0718967	6.20233	-0.020969	0.410825	0.668802	0.144569	4.41405
chr2L	220000	230000	-0.132967	0.0216532	12.5746	0.378778	0.00331031	7.32	-0.020969	0.410825	0.37386	0.391951	5.74974
chr2L	230000	240000	-0.0635821	0.181646	12.5297	0.0554623	0.529222	5.85311	-0.0315785	0.248776	0.459175	0.29571	8.59433
chr2L	240000	250000	-0.121126	0.0365602	12.5591	0.316364	0.0109999	6.95071	-0.0401249	0.150063	0.744221	0.149026	3.18857
chr2L	250000	260000	-0.153759	0.00434205	12.5507	0.0568734	0.470707	6.2019	-0.0404618	0.136271	0.542063	0.26434	3.30288
chr2L	260000	270000	-0.112469	0.0555122	12.5958	0.0965333	0.283848	5.86882	-0.0404618	0.136271	0.668845	0.148047	5.4859
chr2L	270000	280000	-0.079368	0.159973	12.4802	0.232381	0.0324625	6.45668	-0.0404618	0.136271	1.32601	0.023005	4.09612
chr2L	280000	290000	-0.0117973	0.868412	12.6161	0.192529	0.0263529	6.33907	-0.0404618	0.136271	0.76018	0.124147	4.32106
chr2L	290000	300000	-0.102474	0.07357	12.4731	0.241443	0.0280348	6.53009	-0.0393258	0.150063	0.919019	0.050181	6.52589
chr2L	300000	310000	-0.0866136	0.133636	12.3772	0.0189515	0.833966	5.86528	-0.0363285	0.198214	0.919019	0.050181	6.52589
chr2L	310000	320000	-0.0653491	0.214753	12.5495	0.117094	0.166619	5.83174	-0.0289869	0.294222	-0.984936	0.330752	3.00853
chr2L	320000	330000	-0.159912	0.0136084	12.5975	0.138491	0.142681	5.83297	-0.0249316	0.351275	-1.42283	0.047258	0.863758
chr2L	330000	340000	-0.141945	0.0370548	12.6096	0.342282	7.99e-05	6.3315	-0.0214201	0.427567	-0.195669	0.635269	6.80034
chr2L	340000	350000	0.0700064	0.164311	12.4364	-0.153685	0.0797434	5.8758	-0.017682	0.518423	-0.53833	0.403942	1.04471
chr2L	350000	360000	0.380819	1.08e-14	12.4431	-0.366026	6.68e-05	6.30003	-0.017682	0.518423	-0.352104	0.409995	5.85468
chr2L	360000	370000	0.783387	1.23e-28	12.8929	-0.669241	1.08e-11	6.12929	-0.0140458	0.621175	0	-1	0
chr2L	370000	380000	-0.0482602	0.318936	12.547	0.331668	0.00190828	6.4073	-0.00949319	0.734469	0.481828	0.273136	4.78313
chr2L	380000	390000	-0.0315156	0.547376	12.5566	0.257932	0.0229821	6.6061	-0.00797531	0.775132	0.481828	0.273136	4.78313
chr2L	390000	400000	-0.0584915	0.241468	12.5367	0.284249	0.00135225	6.3635	-0.00506268	0.775132	-1.62072	0.14394	0.226452
chr2L	400000	410000	-0.0562218	0.258234	12.5386	0.0720523	0.38365	6.01398	-0.000405039	0.734469	0.787872	0.084935	7.07713
chr2L	410000	420000	-0.18884	0.00327836	12.5927	0.216033	0.0454418	6.47858	0.00246317	0.734469	0.787872	0.084935	7.07713
chr2L	420000	430000	-0.189944	0.00811967	12.6607	0.386555	0.00280847	7.47559	0.00479265	0.638093	0.465191	0.269586	9.25766
chr2L	430000	440000	-0.180799	0.00169077	12.587	0.426493	0.00113154	7.41891	-0.000405039	0.638093	-0.568119	0.32909	2.4149
chr2L	440000	450000	-0.143548	0.0258012	12.5919	0.353118	0.00492467	7.05777	0.00671011	0.617462	0.701456	0.136382	5.29135
chr2L	450000	460000	-0.0874119	0.102499	12.5382	0.0932846	0.242308	6.22134	0.0125896	0.639484	1.53103	0.055929	0.93848
chr2L	460000	470000	-0.169674	0.0146548	12.6296	0.202325	0.0138965	6.07103	0.0125896	0.590393	-0.709469	0.359504	0.907332
chr2L	470000	480000	-0.231022	0.00106362	12.7121	0.269049	0.017173	6.59943	0.0125896	0.565469	0.623755	0.188698	5.06938
chr2L	480000	490000	-0.23861	0.000563326	12.6285	0.496989	6.45e-05	6.98132	0.0125896	0.506455	0.150347	0.725776	5.36591
chr2L	490000	500000	-0.0555463	0.31817	12.5758	0.225284	0.0116972	6.36086	0.00345083	0.441043	0.150347	0.725776	5.36591
chr2L	500000	510000	-0.0817873	0.195525	12.601	0.341307	0.00227895	6.55058	-0.0115473	0.441043	0.150347	0.725776	5.36591
chr2L	510000	520000	-0.141946	0.0364517	12.6273	0.240663	0.0382763	6.53665	-0.0276928	0.31085	0.150347	0.725776	5.36591
chr2L	520000	530000	-0.0639521	0.200694	12.5626	0.360549	0.00178901	6.6856	-0.0488311	0.103618	0.150347	0.725776	5.36591
chr2L	530000	540000	-0.250893	0.000386964	12.7413	0.530776	3.66e-05	6.99584	-0.0555095	0.050046	0.150347	0.725776	5.36591
chr2L	540000	550000	-0.197493	0.00522887	12.6875	0.317366	0.00556256	6.65196	-0.0555095	0.050046	0.527627	0.214684	6.39521
chr2L	550000	560000	-0.119106	0.0579025	12.6006	0.312742	0.00647248	6.59127	-0.0555095	0.050046	0.468768	0.315038	5.04087
chr2L	560000	570000	-0.203386	0.0127424	12.6416	0.270435	0.0160438	6.42457	-0.0555095	0.050046	1.94679	0.000907	2.99079
chr2L	570000	580000	-0.081421	0.28039	12.613	0.298245	0.00430778	6.39202	-0.0555095	0.050046	1.29209	0.020785	5.80234
chr2L	580000	590000	-0.187499	0.000291307	12.563	0.0986089	0.255933	5.77385	-0.048924	0.0697366	-1.29302	0.207871	-2.90627
chr2L	590000	600000	-0.0931171	0.0809862	12.5733	0.249276	0.00256848	6.13329	-0.047308	0.078132	-1.29302	0.207871	-2.90627
chr2L	600000	610000	-0.137865	0.0248905	12.6004	0.262374	0.0194564	6.5782	-0.0354348	0.239739	1.01126	0.059651	2.62978
chr2L	610000	620000	-0.123949	0.0297308	12.5777	0.36382	0.00376411	6.98944	-0.0130407	0.318215	0.269417	0.790986	-2.36469
chr2L	620000	630000	0.148504	0.00562435	12.4142	0.137836	0.0935973	6.1377	0.00539967	0.359849	-2.6243	0.133831	-3.99446
chr2L	630000	640000	-0.194988	6.56e-05	12.4306	0.340689	0.00693665	7.17153	0.0144552	0.461522	1.49058	0.199102	-3.26262
chr2L	640000	650000	-0.145937	0.0136579	12.5284	0.240523	0.0316668	6.56284	0.016326	0.571035	-0.180818	0.671564	10.0479
chr2L	650000	660000	-0.170266	0.00759904	12.4142	0.312928	0.00881023	6.85244	0.0187933	0.626537	-0.180818	0.671564	10.0479
chr2L	660000	670000	-0.264825	6.21e-08	12.4652	0.332839	0.00278771	6.56835	0.0187933	0.643521	-0.543121	0.387468	1.89958
chr2L	670000	680000	-0.159714	0.00138206	12.4483	0.259929	0.0227955	6.63369	0.0187933	0.643521	-0.180818	0.671564	10.0479
chr2L	680000	690000	0.066376	0.325719	12.3014	-0.301653	0.000714087	6.28049	0.0180992	0.652516	-0.254772	0.630636	3.25395
chr2L	690000	700000	0.167518	0.0261912	12.3262	-0.670715	7.84e-08	6.57031	0.0180992	0.634484	-0.180818	0.671564	10.0479
chr2L	700000	710000	-0.0552786	0.324779	12.405	0.128458	0.237935	6.48929	0.00573472	0.635532	-0.180818	0.671564	10.0479
chr2L	710000	720000	-0.0603112	0.302712	12.3382	0.298357	0.0143573	6.89141	-0.00925903	0.635532	0.635662	0.206546	6.18497
chr2L	720000	730000	-0.194782	0.000408879	12.4875	0.285768	0.0114713	6.55204	-0.0121619	0.635532	0.260888	0.836435	-1.6546
chr2L	730000	740000	-0.0591975	0.307677	12.4125	0.281017	0.000754078	6.13116	-0.0153238	0.635532	-1.75139	0.079868	-0.554737
chr2L	740000	750000	-0.158502	0.00473535	12.4266	0.166682	0.0539748	5.92989	-0.0201373	0.592805	-1.75139	0.079868	-0.554737
chr2L	750000	760000	-0.0809891	0.156681	12.5111	0.206999	0.0155488	5.95241	-0.024841	0.471622	-1.20031	0.099214	-0.410291
chr2L	760000	770000	-0.0930344	0.0673739	12.4948	0.119837	0.167085	5.9383	-0.024841	0.419403	-1.20031	0.099214	-0.410291
chr2L	770000	780000	-0.0436991	0.393397	12.4362	-0.69	5.51e-16	6.1663	-0.0253056	0.406407	-4.2463	0	3.1407
chr2L	780000	790000	-0.044127	0.498281	12.6017	0.0565027	0.48963	6.12257	-0.0262316	0.39537	-3.9316	0.00036	-0.880884
chr2L	790000	800000	-0.0612446	0.253195	12.5643	0.114584	0.205475	5.76687	-0.0262316	0.37934	-3.29573	0.001153	-0.776834
chr2L	800000	810000	-0.119633	0.0431851	12.5629	0.177032	0.0517802	5.84454	-0.0300322	0.323722	0	1	-4.80255
chr2L	810000	820000	-0.0870907	0.164586	12.5795	0.224713	0.0111232	6.35389	-0.0300322	0.323722	0.832286	0.215599	1.49927
chr2L	820000	830000	-0.146803	0.03502	12.6146	0.287684	0.00809008	6.45663	-0.0382053	0.201878	0.869816	0.076845	5.79645
chr2L	830000	840000	-0.0129968	0.833833	12.5936	0.129431	0.123603	5.9565	-0.0416319	0.182973	0.254903	0.538185	6.7667
chr2L	840000	850000	-0.164044	0.00176802	12.553	0.309105	0.015887	7.01609	-0.0468477	0.133237	0.254903	0.538185	6.7667
chr2L	850000	860000	-0.181727	0.0169702	12.6385	0.299818	0.00697912	6.55743	-0.0518883	0.129952	-2.68618	0.042618	-3.4786
chr2L	860000	870000	-0.19135	0.00651258	12.6823	0.269701	0.0194716	6.64293	-0.0518883	0.129952	0.626139	0.204435	3.64581
chr2L	870000	880000	-0.0837767	0.2307	12.6544	0.28549	0.0033452	6.38475	-0.0518883	0.129952	1.06255	0.067574	2.43869
chr2L	880000	890000	-0.114504	0.0543258	12.5885	0.22046	0.00816022	6.11184	-0.0507698	0.135123	0.583045	0.527084	-1.53828
chr2L	890000	900000	-0.0648678	0.349871	12.6239	0.133055	0.125559	5.89386	-0.0507698	0.138408	-2.09561	0.050991	8.48512
chr2L	900000	910000	-0.103857	0.0901465	12.5997	0.174339	0.0431637	5.921	-0.0456792	0.175075	-2.09561	0.050991	8.48512
chr2L	910000	920000	-0.0736862	0.202477	12.5857	0.202039	0.0193426	6.01664	-0.0415819	0.22481	-2.32674	0.012795	-0.838944
chr2L	920000	930000	-0.0315354	0.53795	12.4912	0.0819992	0.354907	5.64953	-0.0365326	0.322644	-2.20185	0.02037	1.38669
chr2L	930000	940000	0.0014859	0.985827	12.5607	0.164697	0.0618993	5.79483	-0.0377024	0.330197	-2.20185	0.02037	1.38669
chr2L	940000	950000	-0.0986218	0.0404293	12.4729	0.128921	0.148352	5.69955	-0.0271067	0.489522	-2.20185	0.02037	1.38669
chr2L	950000	960000	-0.130707	0.00777881	12.5161	0.228762	0.010929	5.86454	-0.0215929	0.591226	-2.20185	0.02037	1.38669
chr2L	960000	970000	-0.119499	0.0361523	12.4965	0.149	0.0833507	5.7693	-0.0182519	0.660169	0	-1	0
chr2L	970000	980000	0.0697312	0.200405	12.3611	-0.541512	1.07e-07	5.81968	-0.0133191	0.73278	-0.0845964	0.879972	2.76864
chr2L	980000	990000	0.212946	1.86e-05	12.4434	-0.651352	4.24e-11	5.98573	-0.0133191	0.73278	0.8406	0.084195	3.85013
chr2L	990000	1000000	0.144296	0.00387126	12.4993	-0.436797	5.81e-06	5.97223	-0.0182519	0.660169	-1.5296	0.405826	-3.99549
chr2L	1000000	1010000	0.283462	4.2e-05	12.3141	-0.98984	1.2e-22	6.14428	-0.0215929	0.591226	-2.1715	0.010455	2.89592
chr2L	1010000	1020000	-0.147903	0.00283202	12.429	0.228441	0.0100097	5.72168	-0.0234897	0.451132	-2.1715	0.010455	2.89592
chr2L	1020000	1030000	-0.128451	0.0167151	12.5266	0.0789392	0.375931	5.73577	-0.0304721	0.291807	-1.31525	0.264255	-2.22493
chr2L	1030000	1040000	-0.0920656	0.148149	12.5871	0.1008	0.252177	5.7937	-0.026629	0.291985	-4.86058	0	1.92916
chr2L	1040000	1050000	-0.0838641	0.157055	12.5716	0.123617	0.175493	5.77061	-0.0322456	0.200219	-2.34243	0.009241	-0.728724
chr2L	1050000	1060000	-0.0978814	0.0670843	12.5358	0.186668	0.0238439	6.02189	-0.0382312	0.152737	0.587167	0.188192	6.45247
chr2L	1060000	1070000	-0.17332	0.00582491	12.583	0.344585	0.00752967	7.14559	-0.0399684	0.144902	0.587167	0.188192	6.45247
chr2L	1070000	1080000	-0.138866	0.0232962	12.5407	0.206162	0.0509474	6.42101	-0.0399684	0.144902	0.587167	0.188192	6.45247
chr2L	1080000	1090000	-0.196002	0.00721812	12.6263	0.140395	0.104635	6.06394	-0.0399684	0.144902	0.59241	0.258665	2.98351
chr2L	1090000	1100000	-0.155784	0.000893706	12.5142	0.0527222	0.596944	5.61625	-0.0378259	0.152737	0.59241	0.258665	2.98351
chr2L	1100000	1110000	-0.14686	0.0340526	12.6153	0.226	0.0049333	6.17808	-0.0322456	0.152737	0.681183	0.141863	5.46593
chr2L	1110000	1120000	-0.17305	0.0099053	12.6211	0.427337	7.57e-05	6.44007	-0.0185535	0.15936	0.681183	0.141863	5.46593
chr2L	1120000	1130000	-0.139318	0.00427028	12.5465	0.164224	0.0409537	6.05708	0.000423245	0.15936	0.681183	0.141863	5.46593
chr2L	1130000	1140000	-0.21185	0.00304967	12.6182	0.278418	0.00135607	6.0352	0.0180615	0.14692	-2.20835	0.014529	-0.18605
chr2L	1140000	1150000	-0.101143	0.0482212	12.4652	0.292293	0.00140873	6.36108	0.0302985	0.133635	-2.20835	0.014529	-0.18605
chr2L	1150000	1160000	-0.235676	0.000799708	12.613	0.275383	0.00922492	6.41757	0.0378872	0.0975948	0.474699	0.25574	6.59952
chr2L	1160000	1170000	-0.273849	0.000453494	12.7052	0.286791	0.000966522	6.2991	0.0506492	0.0567217	-1.0764	0.121553	1.57793
chr2L	1170000	1180000	-0.0802427	0.172199	12.5825	0.165393	0.0635665	6.35291	0.0592279	0.0358785	1.51779	0.042188	0.371866
chr2L	1180000	1190000	-0.156454	0.0283834	12.6292	0.397846	0.000775004	6.55955	0.0592279	0.0358785	0.484733	0.279377	4.35514
chr2L	1190000	1200000	-0.0830244	0.124332	12.5803	0.0593119	0.483804	5.69962	0.0592279	0.0358785	0.376958	0.409457	4.0782
chr2L	1200000	1210000	-0.113432	0.0312015	12.5488	0.100977	0.282136	5.60385	0.0592279	0.0358785	-2.41813	0.06635	-2.76735
chr2L	1210000	1220000	-0.132435	0.0162004	12.4882	0.136688	0.122134	5.68987	0.0592279	0.0358785	1.84873	0.374216	-4.26039
chr2L	1220000	1230000	0.247023	0.000205021	12.1061	-0.727123	2.27e-15	5.6813	0.0550294	0.0496183	-0.552316	0.363097	1.88613
chr2L	1230000	1240000	-0.131865	0.00461795	12.5141	0.112487	0.200825	5.67437	0.0359904	0.218341	0	-1	0
chr2L	1240000	1250000	-0.160299	0.00935092	12.4984	0.160152	0.0717757	5.76656	0.0110041	0.389252	-0.110084	0.862534	2.17088
chr2L	1250000	1260000	-0.0439258	0.365338	12.4675	0.110393	0.288075	5.56776	-0.00599997	0.389252	-2.56657	0.00777	1.42009
chr2L	1260000	1270000	-0.0366466	0.563559	12.3995	-0.0874793	0.423116	5.49039	-0.0161819	0.398229	-2.56657	0.00777	1.42009
chr2L	1270000	1280000	-0.0993721	0.0778007	12.3752	0.00941772	0.926791	5.54287	-0.0192033	0.401845	-2.56657	0.00777	1.42009
chr2L	1280000	1290000	-0.130708	0.0327085	12.4242	0.106993	0.23441	5.75384	-0.019791	0.40395	-2.56657	0.00777	1.42009
chr2L	1290000	1300000	-0.0534504	0.342665	12.3115	-0.0262542	0.836401	5.45834	-0.019791	0.409048	-2.56657	0.00777	1.42009
chr2L	1300000	1310000	-0.275702	0.000141793	12.9516	-0.0317982	0.707634	6.13281	-0.019791	0.409048	0.681459	0.141917	3.9221
chr2L	1310000	1320000	-0.00890094	0.892665	12.2238	0.0731104	0.472071	5.52431	-0.019791	0.409048	0	-1	0
chr2L	1320000	1330000	-0.0186749	0.763101	12.277	-0.0133186	0.919214	5.45554	-0.0192033	0.420688	-1.67349	0.575713	-4.31513
chr2L	1330000	1340000	-0.0557082	0.336098	12.2956	0.0768961	0.436698	5.58451	-0.015278	0.559581	-0.527416	0.857017	-3.84142
chr2L	1340000	1350000	0.0756126	0.225594	12.1967	0.00843278	0.940113	5.47421	-0.00933705	0.752522	-3.48103	0.304445	-4.39429
chr2L	1350000	1360000	-0.109153	0.0443899	12.3536	0.105295	0.221018	5.7488	-0.00728153	0.81498	-0.998737	0.339301	0.903588
chr2L	1360000	1370000	-0.0514883	0.358917	12.4173	0.23461	0.00431739	6.12876	-0.00728153	0.81498	-0.998737	0.339301	0.903588
chr2L	1370000	1380000	-0.0367891	0.527925	12.3686	0.0627594	0.494096	5.86198	-0.00538909	0.858623	0.199691	0.63785	8.40148
chr2L	1380000	1390000	-0.0637645	0.313301	12.3903	0.0765914	0.40845	5.80481	-0.0019303	0.9021	0.614175	0.208718	6.64093
chr2L	1390000	1400000	-0.15382	0.00814413	12.4469	0.239838	0.00269361	6.26018	-3e-05	0.9021	0.199691	0.63785	8.40148
chr2L	1400000	1410000	-0.00106625	0.994074	12.35	0.305292	0.00958861	6.68809	-3e-05	0.866616	0.199691	0.63785	8.40148
chr2L	1410000	1420000	-0.132002	0.0139748	12.4355	0.33958	0.00420138	6.74583	0.000913542	0.866616	0.199691	0.63785	8.40148
chr2L	1420000	1430000	-0.0923097	0.104078	12.3625	0.24208	0.0496093	6.9598	0.00295688	0.866616	-3.48103	0.304433	-4.39429
chr2L	1430000	1440000	-0.0398314	0.438289	12.4124	0.189819	0.0718817	6.41478	0.00566951	0.795966	-4.01901	0.200534	-4.22738
chr2L	1440000	1450000	-0.136055	0.00728266	12.4034	0.282161	0.000488871	6.161	0.00572611	0.795966	-0.0670485	0.976334	-1.63182
chr2L	1450000	1460000	-0.139947	0.0079734	12.4262	0.263487	0.0152873	6.45978	0.00572611	0.795966	0	-1	0
chr2L	1460000	1470000	-0.0114049	0.833919	12.3886	0.19884	0.0715067	6.53481	0.00757931	0.844493	0	-1	0
chr2L	1470000	1480000	-0.11881	0.0136267	12.4515	0.278157	0.0077519	6.39322	0.00757931	0.844493	0	-1	0
chr2L	1480000	1490000	-0.111347	0.0214873	12.509	-0.0019983	0.988448	5.86135	0.00757931	0.844493	0	-1	0
chr2L	1490000	1500000	-0.0530308	0.339546	12.5579	0.151373	0.0653073	6.07576	0.00633612	0.807666	-3.64079	0.000139	-1.65665
chr2L	1500000	1510000	-0.00792449	0.876781	12.5046	0.0132262	0.88989	5.81095	0.00259442	0.783554	-3.64079	0.000139	-1.65665
chr2L	1510000	1520000	-0.0208168	0.672705	12.464	-0.00178851	0.99205	5.66184	0.000197147	0.783554	0.408419	0.91253	-3.7373
chr2L	1520000	1530000	0.00101763	0.991329	12.4521	0.0768365	0.391013	5.75631	-0.00240369	0.783554	1.00936	0.357968	-3.51547
chr2L	1530000	1540000	0.0197947	0.711851	12.3864	0.122664	0.382503	5.42189	-0.00803096	0.783554	0	-1	0
chr2L	1540000	1550000	-0.0306096	0.530514	12.4636	0.0221111	0.803326	5.65854	-0.00803096	0.783554	0	-1	0
chr2L	1550000	1560000	0.00608554	0.922151	12.4075	0.215417	0.00715202	6.17374	-0.00803096	0.557551	0.988628	0.106044	1.39273
chr2L	1560000	1570000	-0.0509195	0.331887	12.5287	0.22638	0.00712339	5.92688	-0.00803096	0.394655	0	-1	0
chr2L	1570000	1580000	0.233478	0.000656663	12.6763	-0.138965	0.194295	6.39891	-0.00803096	0.394655	-0.549963	0.198502	4.68753
chr2L	1580000	1590000	-0.119499	0.0136631	12.5389	-0.0566759	0.603611	5.4937	-0.0114033	0.394655	0.345391	0.559322	2.05884
chr2L	1590000	1600000	-0.171888	0.00305603	12.597	0.112593	0.188902	5.93013	-0.00538388	0.394655	0.559162	0.263855	3.13215
chr2L	1600000	1610000	-0.229604	0.00136125	12.6807	0.272795	0.00162765	5.94759	-0.00283581	0.538753	0.498219	0.448774	-0.137727
chr2L	1610000	1620000	-0.173328	0.0194842	12.6535	0.0922579	0.250505	6.0663	0.00128313	0.747657	-1.43003	0.160885	-3.29082
chr2L	1620000	1630000	-0.146248	0.00244925	12.5488	-0.00812223	0.964901	5.41295	0.00378689	0.747657	-1.43003	0.160885	-3.29082
chr2L	1630000	1640000	-0.2951	2.13e-07	12.5889	0.0820721	0.392334	5.62888	0.00603765	0.747657	0	-1	0
chr2L	1640000	1650000	-0.23196	1.14e-05	12.5155	0.354008	1.22e-05	6.26202	0.0102688	0.615063	-3.76565	0.173547	-4.31147
chr2L	1650000	1660000	-0.134812	0.0254074	12.5271	0.18825	0.0204827	6.14266	0.00603765	0.747657	-0.881237	0.059349	7.16146
chr2L	1660000	1670000	-0.189348	4.18e-05	12.516	0.198792	0.0153301	6.17229	0.00603765	0.769678	-0.881237	0.059349	7.16146
chr2L	1670000	1680000	-0.188879	4.5e-05	12.5186	0.108974	0.194368	5.95826	0.00803427	0.695339	-0.881237	0.059349	7.16146
chr2L	1680000	1690000	0.130486	0.0993962	12.1838	-0.781407	1.46e-17	5.78697	0.0117079	0.637084	-0.881237	0.059349	7.16146
chr2L	1690000	1700000	-0.170981	0.0133451	12.6031	0.0711763	0.41052	5.7896	0.019061	0.467078	-0.881237	0.059349	7.16146
chr2L	1700000	1710000	0.0632594	0.272825	12.4191	0.0106866	0.910608	5.63436	0.0289582	0.273969	-0.881237	0.059349	7.16146
chr2L	1710000	1720000	-0.230325	0.000128766	12.5951	0.246429	0.00330576	6.31419	0.0340795	0.167865	0.405699	0.383701	4.16704
chr2L	1720000	1730000	-0.175015	0.00127908	12.5382	0.338151	0.00364471	6.64401	0.0361199	0.160437	0.662673	0.155685	7.42732
chr2L	1730000	1740000	-0.167535	0.00684683	12.4892	0.107546	0.193933	6.00176	0.0361199	0.163161	0.480933	0.291014	3.78929
chr2L	1740000	1750000	-0.0526931	0.332975	12.504	0.16919	0.0398994	6.11577	0.0309986	0.273969	0.339928	0.48636	3.14356
chr2L	1750000	1760000	-0.0967555	0.109104	12.5946	0.131978	0.109437	6.08348	0.0309986	0.273969	-4.12463	4e-06	-1.12347
chr2L	1760000	1770000	-0.096633	0.0369838	12.5103	-0.107181	0.470738	5.42062	0.0309986	0.1903	0	-1	0
chr2L	1770000	1780000	-0.0525909	0.365704	12.4187	-0.382249	0.228042	5.06508	0.0256599	0.146696	0	-1	0
chr2L	1780000	1790000	-0.0494549	0.3265	12.4412	-0.122726	0.480126	5.38506	0.0106466	0.146696	3.30085	0.352387	-4.46128
chr2L	1790000	1800000	0.00747223	0.913733	12.3874	-0.482018	0.157386	4.87146	0.00704228	0.0899415	-0.917004	1	-4.74571
chr2L	1800000	1810000	0.189001	0.00704771	12.538	-0.958576	9.22e-21	5.74364	-0.0136111	0.0899415	-0.367888	0.41349	6.78618
chr2L	1810000	1820000	-0.0574793	0.263713	12.4518	-0.307977	0.281681	5.19375	-0.0440962	0.0899415	0	-1	0
chr2L	1820000	1830000	-0.0690549	0.191783	12.4222	0.140675	0.131494	5.71299	-0.055577	0.04947	-0.257048	0.915768	-2.56745
chr2L	1830000	1840000	-0.0879204	0.0835622	12.4331	-0.0561649	0.755366	5.379	-0.055577	0.0426988	-3.64545	0.032059	-2.79656
chr2L	1840000	1850000	-0.0352832	0.467194	12.4678	0.0350316	0.805616	5.41755	-0.0589019	0.0410036	-3.22813	0.001714	0.8736
chr2L	1850000	1860000	-0.110008	0.0192847	12.4884	0.0883535	0.365282	5.60525	-0.0617913	0.0330161	-3.22813	0.001714	0.8736
chr2L	1860000	1870000	-0.162223	0.000970175	12.5295	0.0833414	0.361875	5.64699	-0.0617913	0.0330161	-1.99617	0.035251	-0.73859
chr2L	1870000	1880000	-0.0747991	0.151932	12.5127	0.0862751	0.343198	5.666	-0.0617913	0.0330161	-1.38997	0.133908	-1.95519
chr2L	1880000	1890000	-0.0701637	0.17137	12.471	0.242413	0.0325857	6.5244	-0.0673256	0.022703	-1.38997	0.133908	-1.95519
chr2L	1890000	1900000	-0.11114	0.111161	11.7609	0.0596589	0.839172	5.00845	-0.0725841	0.0181362	0.0997485	0.808848	6.71197
chr2L	1900000	1910000	-0.0718124	0.235953	12.3305	0.00589989	0.952795	5.63479	-0.0759712	0.0145714	0.0997485	0.808848	6.71197
chr2L	1910000	1920000	-0.00961825	0.877503	12.5544	0.101562	0.304905	5.64794	-0.0759712	0.0145714	0.0997485	0.808848	6.71197
chr2L	1920000	1930000	-0.132318	0.00861365	12.4585	-0.0414142	0.746426	5.47818	-0.0759712	0.0145714	0.0997485	0.808848	6.71197
chr2L	1930000	1940000	-0.0802838	0.152251	12.5871	0.212845	0.00893995	6.03322	-0.0839781	0.0112822	0.0997485	0.808848	6.71197
chr2L	1940000	1950000	-0.0388892	0.472819	12.5474	0.210186	0.0178103	5.93202	-0.0889185	0.0106868	-0.608853	0.62043	-3.21586
chr2L	1950000	1960000	-0.117903	0.129452	12.6024	0.18566	0.0407078	5.75961	-0.089809	0.0106868	-0.924209	0.342855	-1.84985
chr2L	1960000	1970000	-0.0497118	0.391011	12.5936	0.194909	0.0269824	5.76952	-0.089809	0.0106868	-0.924209	0.342855	-1.84985
chr2L	1970000	1980000	-0.0805559	0.254695	12.6348	0.334316	0.00217606	6.39546	-0.089809	0.0106868	1.1556	0.031867	4.36227
chr2L	1980000	1990000	-0.137516	0.00480193	12.5147	0.274187	0.0144338	6.51071	-0.089809	0.0106868	-0.799171	0.241062	1.65215
chr2L	1990000	2000000	-0.104766	0.034285	12.523	0.0947359	0.409812	5.47861	-0.089809	0.0118977	-3.00767	0.02184	-2.71942
chr2L	2000000	2010000	-0.0775333	0.093172	12.5034	0.0687373	0.447519	5.7401	-0.0870077	0.0148952	-3.13966	0.086925	-3.65223
chr2L	2010000	2020000	-0.19619	0.000105903	12.4942	0.00692546	0.939601	5.75033	-0.0769076	0.0186608	0.347496	0.443904	4.15871
chr2L	2020000	2030000	-0.171851	0.0119133	12.6016	0.172	0.0677653	5.77038	-0.057803	0.0458048	0.347496	0.443904	4.15871
chr2L	2030000	2040000	-0.132331	0.0194529	12.5661	0.214042	0.00847413	6.16145	-0.036304	0.18949	1.32998	0.03412	2.63018
chr2L	2040000	2050000	-0.107975	0.0309406	12.5367	0.281244	0.000561257	6.09627	-0.0254381	0.333024	0.583143	0.184118	6.11073
chr2L	2050000	2060000	-0.0432338	0.576601	12.6401	0.18306	0.0446465	5.67852	-0.0200455	0.465326	0.474919	0.33468	2.85651
chr2L	2060000	2070000	-0.168719	0.0145649	12.6017	0.0955172	0.320251	5.62769	-0.0174547	0.510368	-0.360512	0.67851	-1.96836
chr2L	2070000	2080000	0.0307824	0.51807	12.5437	0.0936606	0.412836	5.47305	-0.0174547	0.510368	0.0417316	1	-3.20528
chr2L	2080000	2090000	-0.0889855	0.0868896	12.5681	0.119578	0.234686	5.58709	-0.0126437	0.613809	2.90994	0.598986	-4.55105
chr2L	2090000	2100000	-0.115097	0.05307	12.5452	0.133314	0.113975	5.70909	-0.00986312	0.658544	0.154163	0.710498	7.28317
chr2L	2100000	2110000	0.400337	2.57e-05	12.2202	-1.94119	2.06e-76	6.0825	-0.00885396	0.658544	0.39234	0.457126	3.30311
chr2L	2110000	2120000	0.424221	1.49e-16	12.3797	-0.399453	7.12e-05	5.88603	-0.00680524	0.658544	-0.671435	0.243416	2.8438
chr2L	2120000	2130000	-0.137811	0.0100318	12.4736	0.137727	0.12765	5.66497	0.00236416	0.658544	-1.28991	0.246749	-1.29665
chr2L	2130000	2140000	-0.152312	0.0020406	12.5526	0.202018	0.0270288	6.35045	0.00805918	0.658544	0.245472	0.553298	7.13882
chr2L	2140000	2150000	-0.167889	0.0140958	12.6559	0.210744	0.021885	6.35243	0.00327464	0.673045	0.245472	0.553298	7.13882
chr2L	2150000	2160000	-0.168551	0.0223607	12.6479	0.179599	0.0283826	6.16289	-0.000394913	0.724669	0.316992	0.447172	6.30363
chr2L	2160000	2170000	-0.16781	0.0135856	12.6337	0.353107	0.00668942	7.37586	0.00327464	0.724669	0.316992	0.447172	6.30363
chr2L	2170000	2180000	-0.0628779	0.289557	12.5198	0.242667	0.0400247	6.65961	0.00805918	0.724669	0.316992	0.447172	6.30363
chr2L	2180000	2190000	-0.131583	0.0580609	12.6896	0.433942	0.000125917	6.55273	0.0112681	0.648417	0.792383	0.105282	3.91261
chr2L	2190000	2200000	-0.510671	1.2e-12	12.7566	0.684098	4.21e-07	7.43086	0.0112681	0.648417	0.792383	0.105282	3.91261
chr2L	2200000	2210000	-0.159985	0.0204121	12.6169	0.518809	0.000134355	7.12861	0.00866431	0.752229	-1.43283	0.170806	-2.03342
chr2L	2210000	2220000	-0.143869	0.0398479	12.6601	0.215428	0.0470637	6.48753	0.00658674	0.826597	0.797886	0.095321	4.31877
chr2L	2220000	2230000	-0.0578933	0.270207	12.447	0.064649	0.414088	6.28843	0.0062589	0.848293	1.32244	0.018408	4.73045
chr2L	2230000	2240000	-0.118194	0.113604	12.6248	0.282332	0.006203	6.39257	0.00608895	0.858976	1.08595	0.034659	5.63205
chr2L	2240000	2250000	-0.0765218	0.12477	12.5015	0.168363	0.0506526	5.93355	0.00686402	0.83728	-1.09779	0.303551	2.75673
chr2L	2250000	2260000	-0.0642259	0.232992	12.4126	0.0334558	0.727187	5.58279	0.00899435	0.792828	2.17356	0.386374	-4.11551
chr2L	2260000	2270000	-0.14746	0.00576412	12.555	0.030769	0.772729	5.50596	0.00899435	0.792828	-2.03666	0.222869	-3.76446
chr2L	2270000	2280000	-0.140458	0.00395767	12.4687	0.0418843	0.680565	5.55553	0.00899435	0.792828	0.0860996	1	-3.4684
chr2L	2280000	2290000	-0.112898	0.0278955	12.5615	0.0105092	0.903649	5.70909	0.00899435	0.792828	1.03432	0.636526	-4.00172
chr2L	2290000	2300000	0.276187	4.11e-05	12.3216	-1.12122	1.78e-30	5.83688	0.0208611	0.546077	-1.42628	0.015384	6.44668
chr2L	2300000	2310000	-0.0468003	0.38542	12.4963	0.0194337	0.841881	5.60899	0.0336771	0.286419	1.36708	0.094079	0.459547
chr2L	2310000	2320000	-0.0969669	0.0776113	12.4931	0.001382	0.989654	5.49007	0.0336771	0.281521	0.688467	0.244279	2.0619
chr2L	2320000	2330000	-0.113411	0.0271291	12.4863	-0.00957519	0.930817	5.57842	0.0336771	0.281521	-0.298566	0.630979	1.09299
chr2L	2330000	2340000	-0.117932	0.0331263	12.4799	0.00921606	0.939906	5.44445	0.0336771	0.281521	-0.324912	0.504766	3.13577
chr2L	2340000	2350000	-0.0542774	0.249243	12.522	-0.00471949	0.976651	5.45364	0.0336771	0.281521	-0.324912	0.504766	3.13577
chr2L	2350000	2360000	-0.0331297	0.497852	12.4561	0.0773961	0.368544	5.87057	0.034127	0.23413	0.806017	0.075257	6.45142
chr2L	2360000	2370000	-0.00742476	0.886248	12.4778	0.0771355	0.362498	6.15113	0.029315	0.242691	0.806017	0.075257	6.45142
chr2L	2370000	2380000	-0.0605594	0.290914	12.5782	0.159572	0.0496838	6.14371	0.0258296	0.277815	0.989174	0.139306	0.668088
chr2L	2380000	2390000	-0.0653298	0.233132	12.57	0.18415	0.0256627	6.08273	0.0206183	0.392964	0.923311	0.213092	-1.81475
chr2L	2390000	2400000	-0.0693356	0.165842	12.5003	0.11357	0.228573	5.64628	0.0144484	0.53038	-2.92249	0.005284	0.511257
chr2L	2400000	2410000	0.0180314	0.709411	12.4909	0.112588	0.239886	5.60373	0.0107449	0.53038	-3.26614	0.004564	0.805814
chr2L	2410000	2420000	-0.115178	0.0183488	12.5452	0.249526	0.00205061	6.16442	0.00811945	0.65048	-3.26614	0.004564	0.805814
chr2L	2420000	2430000	-0.108108	0.0400438	12.5658	0.287257	0.00244145	6.37387	0.00681886	0.53038	1.01268	0.055887	6.23836
chr2L	2430000	2440000	-0.0415933	0.39739	12.4793	0.237408	0.00279742	6.24704	-0.00146473	0.438049	1.01268	0.055887	6.23836
chr2L	2440000	2450000	-0.131054	0.0306064	12.5961	0.368978	0.000905488	6.55536	-0.00824403	0.39383	1.01268	0.055887	6.23836
chr2L	2450000	2460000	-0.0827311	0.0827733	12.5347	0.325755	0.00509211	6.67455	-0.0144694	0.39383	1.01268	0.055887	6.23836
chr2L	2460000	2470000	-0.178296	0.000309301	12.5304	0.299055	0.0151816	6.74433	-0.021272	0.39383	0.784106	0.581562	-3.57254
chr2L	2470000	2480000	-0.0915333	0.0764993	12.4778	0.174231	0.0565073	6.37327	-0.0226318	0.348013	0.827705	0.438892	-3.07904
chr2L	2480000	2490000	-0.175212	0.00381242	12.5426	0.466237	0.000214003	7.138	-0.0325099	0.202597	2.9052	0.013482	-3.09275
chr2L	2490000	2500000	-0.169941	0.00330657	12.5917	0.264838	0.00210069	6.33177	-0.0444495	0.0797982	0.903683	0.07542	4.70642
chr2L	2500000	2510000	-0.087601	0.0763138	12.4567	-0.0465094	0.77984	5.39582	-0.0447708	0.0797982	-0.532679	1	-4.47656
chr2L	2510000	2520000	-0.119756	0.0485975	12.4916	0.0637423	0.501296	5.62245	-0.0447708	0.0797982	0.917659	1	-4.45709
chr2L	2520000	2530000	-0.111101	0.0334093	12.5482	0.100933	0.284322	5.62534	-0.0447708	0.0797982	0	-1	0
chr2L	2530000	2540000	-0.160537	0.00289793	12.5214	0.141943	0.166182	5.53273	-0.0447708	0.0797982	-2.63274	0.556049	-4.58003
chr2L	2540000	2550000	-0.105399	0.0654234	12.4983	0.0253803	0.805027	5.5754	-0.0447708	0.0886384	0	-1	0
chr2L	2550000	2560000	-0.0958921	0.11416	12.5502	0.0641025	0.476835	5.74006	-0.0420156	0.116815	0.345169	0.899233	-3.55874
chr2L	2560000	2570000	0.0488866	0.407026	12.2692	-0.491232	1.04e-07	5.82148	-0.0305473	0.294994	-0.98438	0.026871	4.56663
chr2L	2570000	2580000	-0.0776648	0.128838	12.4643	0.0890768	0.269771	6.12997	-0.0174295	0.539837	-0.868442	0.049683	5.5884
chr2L	2580000	2590000	-0.211995	0.00127521	12.5992	0.218267	0.00637029	6.18136	-0.0131566	0.609924	0.686472	0.127343	5.69743
chr2L	2590000	2600000	-0.0532052	0.284837	12.4829	0.0601198	0.504997	5.65826	-0.00644365	0.658578	0.453466	0.812611	-3.39765
chr2L	2600000	2610000	-0.188466	0.000140738	12.4857	0.0916224	0.290817	5.6908	-0.00141443	0.707153	-0.990043	1	-4.30482
chr2L	2610000	2620000	-0.166376	0.000970836	12.4217	0.0785173	0.427753	5.56928	-0.00141443	0.707153	-0.0467316	1	-4.3653
chr2L	2620000	2630000	-0.1299	0.0212592	12.4237	0.152283	0.113759	5.62747	-0.00644365	0.658578	0.899043	0.659504	-4.03414
chr2L	2630000	2640000	-0.0732848	0.17998	12.3827	0.076271	0.404314	5.67469	-0.00218577	0.707153	0	-1	0
chr2L	2640000	2650000	-0.13708	0.00889957	12.4048	0.100718	0.281004	5.64216	-0.00141443	0.766919	2.2931	0.082306	-2.97711
chr2L	2650000	2660000	-0.0408527	0.457541	12.3874	0.0514297	0.612153	5.60067	-0.000307046	0.873998	2.2931	0.082306	-2.97711
chr2L	2660000	2670000	0.060993	0.31977	12.3726	-0.250071	0.0228052	5.49334	0.00173128	0.794913	0.290818	0.565191	2.54491
chr2L	2670000	2680000	0.00959869	0.85216	12.4649	0.124746	0.223677	5.5798	-0.000307046	0.847844	-1.34785	0.170146	-1.87932
chr2L	2680000	2690000	-0.065468	0.215761	12.3861	-0.0288906	0.883133	5.36855	-0.000307046	0.902491	-1.34785	0.170146	-1.87932
chr2L	2690000	2700000	-0.0763165	0.21998	12.4789	0.0874287	0.340339	5.65151	-0.000307046	0.902491	-0.932279	0.447358	-3.1241
chr2L	2700000	2710000	-0.144104	0.00711462	12.484	0.139251	0.115269	5.72001	0.00173128	0.843566	-1.6588	0.060584	-0.699235
chr2L	2710000	2720000	-0.128851	0.010828	12.551	0.107801	0.281897	5.60683	0.00365619	0.843566	-1.6588	0.060584	-0.699235
chr2L	2720000	2730000	-0.0576545	0.268695	12.4304	-0.0626137	0.550958	5.54821	0.0058735	0.843566	0.432065	0.638383	1.01508
chr2L	2730000	2740000	-0.118271	0.01661	12.5465	0.107449	0.19412	6.00443	0.0079777	0.788918	1.18631	0.239149	0.992046
chr2L	2740000	2750000	-0.167782	0.0114304	12.5774	0.192595	0.0282709	6.34819	0.00996194	0.715628	1.30108	0.027904	4.51938
chr2L	2750000	2760000	-0.191828	0.000984686	12.596	0.326669	0.00978073	7.24592	0.0138169	0.595573	1.89741	0.009422	9.31789
chr2L	2760000	2770000	-0.140058	0.0127855	12.5891	0.194254	0.0744106	6.48575	0.0138169	0.595573	1.11083	0.028922	3.66867
chr2L	2770000	2780000	0.101912	0.187317	12.0644	-0.952425	8.22e-22	5.76793	0.0138169	0.595573	-0.95889	0.025539	5.81935
chr2L	2780000	2790000	0.346005	3.66e-06	12.3567	-0.489686	0.147596	5.0009	0.0138169	0.595573	-0.95889	0.025539	5.81935
chr2L	2790000	2800000	0.0154344	0.766975	12.4204	-0.0237212	0.838379	5.48321	0.0138169	0.595573	-0.95889	0.025539	5.81935
chr2L	2800000	2810000	-0.0474768	0.321293	12.5226	0.354073	0.00106322	6.47502	0.0128385	0.64538	0.61073	0.363654	2.77155
chr2L	2810000	2820000	-0.140911	0.0297333	12.5876	0.221675	0.00794218	6.05154	0.00736743	0.777071	0.61073	0.363654	2.77155
chr2L	2820000	2830000	-0.0987573	0.0584314	12.4722	0.0472598	0.559464	6.0674	0.00313856	0.777071	0.66965	0.181395	3.24501
chr2L	2830000	2840000	-0.0672002	0.163335	12.5184	0.218725	0.00765756	6.31441	0.000327907	0.822222	-5.34677	0.001893	-1.17004
chr2L	2840000	2850000	-0.0434948	0.424433	12.3809	0.25098	0.00288852	6.13954	0.000327907	0.872087	-1.14609	0.226267	-1.22014
chr2L	2850000	2860000	-0.041488	0.407208	12.4547	0.104973	0.194931	6.17083	-0.00110276	0.872087	-1.14609	0.226267	-1.22014
chr2L	2860000	2870000	-0.0533722	0.342137	12.4551	0.0509394	0.552763	5.82997	-0.0031529	0.868511	0.454764	0.287753	5.77708
chr2L	2870000	2880000	-0.107402	0.0901192	12.5661	0.256968	0.0249653	6.67555	-0.0031529	0.868511	1.21644	0.042906	4.14148
chr2L	2880000	2890000	0.00803911	0.877467	12.5379	0.177831	0.119479	6.60153	-0.00110276	0.868511	1.21644	0.042906	4.14148
chr2L	2890000	2900000	-0.00346997	0.950547	12.483	0.0772621	0.415468	5.69584	0.000327907	0.767798	1.01731	0.062901	6.22511
chr2L	2900000	2910000	-0.0941441	0.0598698	12.4885	0.154023	0.0594768	6.03317	0.000856399	0.66432	1.01731	0.062901	6.22511
chr2L	2910000	2920000	-0.0141055	0.818003	12.4785	0.025996	0.785084	5.61568	0.00674233	0.594328	0.281581	0.549176	7.04695
chr2L	2920000	2930000	0.0255403	0.637398	12.4066	0.00435538	0.962855	5.71071	0.0135699	0.594328	1.7496	0.082082	0.284097
chr2L	2930000	2940000	-0.011457	0.838179	12.5464	-0.308332	0.000397808	5.69447	0.0169079	0.535318	-1.49844	0.00065	4.52675
chr2L	2940000	2950000	-0.075108	0.265059	12.6175	0.152178	0.0777308	5.81438	0.0187613	0.507577	0.281581	0.549176	7.04695
chr2L	2950000	2960000	-0.0110161	0.83021	12.4815	0.020063	0.809049	6.28536	0.0194295	0.475418	-4.14127	0	2.11082
chr2L	2960000	2970000	0.10036	0.0359505	12.4968	0.0980532	0.258616	5.74634	0.0206064	0.454105	-3.45124	0	3.71073
chr2L	2970000	2980000	-0.148756	0.0297879	12.5918	0.270331	0.0173689	6.59984	0.0250856	0.3915	1.09817	0.036242	4.06627
chr2L	2980000	2990000	-0.256892	0.00112688	12.6524	0.306462	0.000193802	6.30269	0.0302007	0.299292	0.770391	0.104952	6.08108
chr2L	2990000	3000000	-0.208307	0.00341357	12.5948	0.272331	0.00987516	6.41479	0.032148	0.254864	0.84262	0.084759	5.79836
chr2L	3000000	3010000	-0.162346	0.00239527	12.5562	0.286005	0.00139277	6.34953	0.0330652	0.240084	2.34495	0.012483	0.960651
chr2L	3010000	3020000	-0.233294	0.000884422	12.6366	0.245571	0.00510706	6.33324	0.0330652	0.240084	1.02515	0.107408	1.19534
chr2L	3020000	3030000	-0.17097	0.0439321	12.6923	0.249978	0.0202004	6.45334	0.0311179	0.286332	1.02515	0.107408	1.19534
chr2L	3030000	3040000	-0.184129	0.0154826	12.6161	0.20916	0.0203867	6.34444	0.0382006	0.240084	1.64443	0.018387	2.74995
chr2L	3040000	3050000	-0.180923	0.00207362	12.563	0.167423	0.0468315	5.90606	0.043423	0.228626	-1.98451	0.053423	-2.45823
chr2L	3050000	3060000	-0.187324	0.00787064	12.6335	0.371031	0.00270854	6.79763	0.0443521	0.21496	-1.49367	0.055905	-0.0686036
chr2L	3060000	3070000	-0.253651	0.000425405	12.7221	0.240392	0.00696381	6.03103	0.0452758	0.200344	-1.09724	0.025257	11.1364
chr2L	3070000	3080000	0.285507	1.46e-07	12.4451	-0.928919	1.51e-25	6.04231	0.0449123	0.21496	-1.39938	0.014964	6.39618
chr2L	3080000	3090000	-0.15651	0.00596888	12.4626	0.184053	0.0410341	5.87703	0.0443468	0.21496	-1.09724	0.025257	11.1364
chr2L	3090000	3100000	-0.067936	0.152562	12.485	0.253975	0.0103751	6.38667	0.0356058	0.315006	-1.09724	0.025257	11.1364
chr2L	3100000	3110000	-0.0140334	0.784168	12.4838	-0.0105808	0.906421	5.96624	0.0247752	0.453043	-1.14623	0.19001	-1.91494
chr2L	3110000	3120000	0.0184577	0.726852	12.4901	-0.00943749	0.928453	5.63383	0.0247952	0.413438	-1.14623	0.19001	-1.91494
chr2L	3120000	3130000	-0.0236899	0.644049	12.5249	0.0763641	0.437221	5.593	0.0245157	0.363098	1.27443	0.347732	-2.48174
chr2L	3130000	3140000	0.179893	0.000465274	12.5304	0.0126555	0.90822	5.48981	0.0245157	0.363098	0	-1	0
chr2L	3140000	3150000	0.058787	0.253367	12.4714	0.163809	0.0519957	5.99526	0.0192547	0.479189	2.19622	0.086296	-0.461471
chr2L	3150000	3160000	-0.0394522	0.480751	12.4056	0.225573	0.0043877	6.23084	0.0168445	0.568093	0.580073	0.181052	6.05641
chr2L	3160000	3170000	-0.0558543	0.386022	12.2118	0.239725	0.00342756	6.11081	0.0142983	0.637881	0.55253	0.235212	5.51645
chr2L	3170000	3180000	-0.011951	0.828907	12.5442	0.076789	0.367709	5.9976	0.014727	0.620373	-1.82612	0.055021	-1.24004
chr2L	3180000	3190000	-0.036585	0.489469	12.4525	-0.0156893	0.951326	5.32431	0.0167085	0.548977	-1.82612	0.055021	-1.24004
chr2L	3190000	3200000	-0.0767588	0.185835	12.3915	-0.0374245	0.784779	5.43331	0.016727	0.548977	-1.82612	0.055021	-1.24004
chr2L	3200000	3210000	0.410614	1.22e-07	12.2	-1.25766	1.03e-24	5.63931	0.016727	0.548977	-1.82612	0.055021	-1.24004
chr2L	3210000	3220000	-0.12853	0.0269049	12.4764	0.012036	0.932776	5.40507	0.0121993	0.692756	0.143904	0.816295	1.35075
chr2L	3220000	3230000	-0.0654683	0.223912	12.4164	0.045175	0.712303	5.45434	0.0120623	0.692756	0	-1	0
chr2L	3230000	3240000	-0.0947096	0.0790317	12.4612	0.0753041	0.480197	5.51383	0.0114206	0.692756	0	-1	0
chr2L	3240000	3250000	-0.13112	0.010768	12.4758	-0.00489299	0.977067	5.46349	0.0111753	0.631621	0	-1	0
chr2L	3250000	3260000	0.361238	1.82e-07	12.2735	-0.112548	0.205098	5.9356	0.00793588	0.455619	-1.86006	3.8e-05	5.22212
chr2L	3260000	3270000	-0.0281234	0.63851	12.3885	-0.188198	0.550203	5.11614	-0.00405629	0.250641	-3.63501	0.313885	-4.36759
chr2L	3270000	3280000	-0.032037	0.562409	12.4184	-0.00208915	0.99544	5.44689	-0.0310551	0.198136	-1.3693	0.233249	-0.537048
chr2L	3280000	3290000	-0.0341989	0.516052	12.4154	-0.0849491	0.772907	5.21487	-0.0467951	0.0841016	-1.3693	0.233249	-0.537048
chr2L	3290000	3300000	-0.053247	0.317838	12.4584	0.131213	0.123682	5.8723	-0.0489478	0.055449	-0.97703	0.305626	0.599018
chr2L	3300000	3310000	-0.0449335	0.346726	12.5142	0.0353574	0.671626	5.96914	-0.0489478	0.055449	-0.760852	0.23518	1.62851
chr2L	3310000	3320000	-0.117443	0.0170418	12.4874	0.126024	0.144255	5.82856	-0.0489478	0.055449	-0.760852	0.23518	1.62851
chr2L	3320000	3330000	-0.0835989	0.0924825	12.4981	0.0400952	0.647377	5.70656	-0.0489478	0.055449	-3.30224	0.039239	-3.12516
chr2L	3330000	3340000	-0.130766	0.00795133	12.4928	0.199681	0.0181827	6.04373	-0.0484234	0.0836188	1.53009	0.006178	4.46814
chr2L	3340000	3350000	-0.0403194	0.437545	12.4696	0.173665	0.0404313	6.30455	-0.0466859	0.109606	1.53009	0.006178	4.46814
chr2L	3350000	3360000	-0.0956474	0.0586494	12.4327	0.0720834	0.388638	6.24291	-0.0416168	0.140924	1.53009	0.006178	4.46814
chr2L	3360000	3370000	-0.123933	0.00856838	12.495	0.191728	0.0369469	5.78714	-0.035413	0.193302	0.61804	0.199086	5.65945
chr2L	3370000	3380000	-0.146067	0.00654538	12.5397	0.0912771	0.275584	6.12213	-0.0247085	0.382668	0.61804	0.199086	5.65945
chr2L	3380000	3390000	-0.0306642	0.581353	12.4304	-0.0473407	0.74991	5.4119	-0.0190158	0.482852	0.248745	0.661688	1.92984
chr2L	3390000	3400000	0.00364925	0.946571	12.4526	-0.00221213	0.996331	5.42342	-0.0155627	0.568296	-2.56491	0.586954	-4.59052
chr2L	3400000	3410000	0.017151	0.726667	12.4651	0.0396829	0.822558	5.36766	-0.0155627	0.568628	0.177127	0.772301	3.02002
chr2L	3410000	3420000	-0.0250638	0.646987	12.4532	0.106504	0.228448	5.7882	-0.0155627	0.568628	0.350172	0.60853	-0.0125269
chr2L	3420000	3430000	-0.0248211	0.652866	12.3702	0.181787	0.0353818	5.69124	-0.0155627	0.568628	0.0833541	0.911142	0.863584
chr2L	3430000	3440000	-0.0937406	0.0586675	12.4606	0.179425	0.0352243	5.83051	-0.0170788	0.550823	0	-1	0
chr2L	3440000	3450000	-0.0583631	0.207411	12.4805	0.154194	0.0568724	6.04354	-0.0172182	0.525549	-1.96122	0.074144	-2.93215
chr2L	3450000	3460000	-0.21844	0.00253163	12.6102	0.248881	0.00172424	6.28221	-0.0193274	0.457911	1.23313	0.035072	3.48674
chr2L	3460000	3470000	-0.186019	0.00747797	12.6438	0.28134	0.00121026	6.26685	-0.0221244	0.404433	1.02704	0.107284	1.45177
chr2L	3470000	3480000	-0.120605	0.0813501	12.7019	0.19139	0.0161697	6.20374	-0.0242254	0.373598	-1.92083	0.078133	-0.819438
chr2L	3480000	3490000	-0.00962558	0.847509	12.4915	0.142556	0.128094	5.88809	-0.025622	0.33591	-0.251118	0.697956	0.207785
chr2L	3490000	3500000	-0.104498	0.0375567	12.5013	0.271574	0.00115319	6.31465	-0.0287599	0.290697	1.55534	0.159805	0.267776
chr2L	3500000	3510000	-0.0590406	0.256547	12.4802	0.155349	0.0777975	5.89156	-0.034869	0.230082	-2.85949	0.063655	-3.06407
chr2L	3510000	3520000	-0.231942	8.82e-05	12.5989	0.254094	0.00329756	6.29133	-0.0385671	0.192256	0.389383	0.364459	6.13207
chr2L	3520000	3530000	-0.127782	0.00960512	12.5605	0.180824	0.0303913	6.03432	-0.0416825	0.136128	0.752226	0.123583	4.87427
chr2L	3530000	3540000	-0.110445	0.0278218	12.5237	0.313302	0.00891836	6.71269	-0.0457211	0.0830507	1.15893	0.022155	5.49012
chr2L	3540000	3550000	-0.0196515	0.690984	12.4556	0.341366	2.87e-05	6.22322	-0.0478811	0.0801046	1.15893	0.022155	5.49012
chr2L	3550000	3560000	-0.184322	0.000371586	12.5484	0.361234	0.00253501	6.79869	-0.0518168	0.0648162	0	-1	0
chr2L	3560000	3570000	-0.139286	0.0141449	12.55	0.34509	0.00293983	6.66037	-0.0566038	0.04998	-3.08455	0.339954	-4.49242
chr2L	3570000	3580000	-0.170381	0.0165189	12.6221	0.274392	0.000637669	6.18507	-0.0592755	0.0461109	0.438775	0.331349	3.97551
chr2L	3580000	3590000	-0.17504	0.000338048	12.4882	0.345124	0.00389952	6.82071	-0.0592755	0.0461109	0.438775	0.331349	3.97551
chr2L	3590000	3600000	-0.246075	5.79e-06	12.5785	0.298829	0.00589863	6.47635	-0.0577586	0.0468648	1.10021	0.635399	-3.77403
chr2L	3600000	3610000	-0.123823	0.0291342	12.5963	0.25914	0.00115827	6.23496	-0.0577586	0.0468648	1.08348	0.056172	2.6455
chr2L	3610000	3620000	-0.213711	0.000293016	12.5458	0.309389	0.000216555	6.25038	-0.055654	0.0588063	-0.0665474	0.910298	1.85009
chr2L	3620000	3630000	-0.0833855	0.209237	12.6136	0.182003	0.0259224	6.06597	-0.055654	0.0588063	0.712902	0.110164	5.79542
chr2L	3630000	3640000	-0.124715	0.0203039	12.5039	0.155513	0.0791139	6.3538	-0.0463765	0.0996785	-1.10648	0.023841	11.0433
chr2L	3640000	3650000	-0.0531483	0.302075	12.4576	-0.105058	0.346617	5.58393	-0.0340149	0.235119	-1.47176	0.015091	5.85447
chr2L	3650000	3660000	0.297948	8.44e-05	12.3047	-0.919693	3.49e-23	6.1364	-0.0148367	0.235119	-1.47176	0.015091	5.85447
chr2L	3660000	3670000	-0.131112	0.0155878	12.4318	0.180833	0.034595	5.74774	-0.00214706	0.249618	-4.32997	0.076256	-4.12296
chr2L	3670000	3680000	-0.122897	0.0181759	12.429	0.112988	0.203696	5.76881	0.0127362	0.249618	-0.881731	0.318491	-1.70467
chr2L	3680000	3690000	-0.175616	0.0101474	12.5775	0.0462933	0.632825	5.58015	0.0280542	0.249618	-0.881731	0.318491	-1.70467
chr2L	3690000	3700000	-0.0356841	0.520254	12.4512	-0.0703127	0.467564	5.60131	0.0380716	0.249618	-4.4728	0.000778	0.75478
chr2L	3700000	3710000	-0.00432863	0.948211	12.4009	-0.0541792	0.549272	5.69945	0.0475966	0.146463	-1.10199	0.181494	-1.03016
chr2L	3710000	3720000	-0.0816557	0.0874773	12.5292	0.0622775	0.458935	5.95972	0.0475966	0.146463	-1.77191	0.045341	0.483852
chr2L	3720000	3730000	0.102455	0.0802822	12.3468	-0.117331	0.601394	5.3175	0.0483737	0.146142	-1.77191	0.045341	0.483852
chr2L	3730000	3740000	0.0515832	0.3449	12.3918	0.0143938	0.891844	5.53914	0.0483737	0.146142	-0.781247	0.349075	0.170665
chr2L	3740000	3750000	-0.137611	0.0060568	12.5063	0.0197701	0.83055	5.75587	0.0509125	0.136611	-0.781247	0.349075	0.170665
chr2L	3750000	3760000	-0.076597	0.144334	12.4749	0.0550255	0.649718	5.45336	0.0483737	0.146142	-1.62512	0.116641	-1.02386
chr2L	3760000	3770000	-0.158964	0.00186561	12.5554	0.181329	0.0294545	6.27435	0.0472697	0.136611	-3.86431	0.002314	-2.76879
chr2L	3770000	3780000	-0.0178615	0.796175	12.4896	0.3711	0.00617463	7.43124	0.0472697	0.143564	0.563501	0.195078	8.32653
chr2L	3780000	3790000	-0.0694638	0.213165	12.5726	0.279608	0.0196424	6.84586	0.0432865	0.151293	0.563501	0.195078	8.32653
chr2L	3790000	3800000	0.0189656	0.719527	12.5463	-0.0255889	0.781682	5.83982	0.0387556	0.154076	0.121091	0.769058	8.07927
chr2L	3800000	3810000	-0.0971247	0.0468457	12.4791	0.163661	0.121804	6.39869	0.0371374	0.186046	1.57396	0.012697	4.73834
chr2L	3810000	3820000	-0.142431	0.00203017	12.515	0.145926	0.0867153	5.95492	0.0362182	0.186046	1.57396	0.012697	4.73834
chr2L	3820000	3830000	-0.127191	0.00820591	12.5202	0.146017	0.091613	5.80542	0.0329399	0.228544	-1.50224	0.20632	-2.82446
chr2L	3830000	3840000	-0.0116891	0.815374	12.4639	0.246733	0.00233083	6.05566	0.0291696	0.271307	-1.38283	0.206553	-1.91134
chr2L	3840000	3850000	-0.136448	0.00635268	12.461	0.0883519	0.315104	5.70667	0.0267312	0.311549	0.978027	0.747105	-4.20194
chr2L	3850000	3860000	-0.182869	0.00019524	12.4784	0.059333	0.491224	5.96825	0.0245123	0.331958	2.0023	0.177882	-3.87818
chr2L	3860000	3870000	-0.134773	0.0288837	12.5382	0.291102	0.00107589	6.36358	0.020539	0.435364	0.344483	0.409645	6.11358
chr2L	3870000	3880000	-0.15257	0.0022208	12.5256	0.144785	0.0781261	6.05623	0.0184557	0.484584	1.04118	0.072462	2.39753
chr2L	3880000	3890000	-0.0226135	0.657807	12.4532	0.126231	0.136328	6.17035	0.0171765	0.516364	0.344483	0.409645	6.11358
chr2L	3890000	3900000	0.0229592	0.715646	12.2353	8.49e-05	0.99484	5.35825	0.0164275	0.527833	0.283839	0.505771	5.57951
chr2L	3900000	3910000	0.0185981	0.758141	12.249	-0.208112	0.44379	5.23009	0.0164275	0.527833	0.283839	0.505771	5.57951
chr2L	3910000	3920000	-0.0217837	0.667718	12.4729	0.17686	0.0470248	5.81807	0.0164275	0.527833	-0.258526	0.668789	2.26716
chr2L	3920000	3930000	0.00504219	0.940714	12.2113	0.0113368	0.905737	5.59653	0.0171765	0.516364	-0.258526	0.668789	2.26716
chr2L	3930000	3940000	-0.08153	0.222185	12.1384	-0.00540313	0.960351	5.67392	0.0184557	0.473598	-0.258526	0.668789	2.26716
chr2L	3940000	3950000	-0.0097188	0.907457	12.1753	-0.0431227	0.885176	5.21681	0.0249144	0.329	-0.258526	0.668789	2.26716
chr2L	3950000	3960000	0.0117055	0.86531	12.1573	-0.121239	0.610787	5.30434	0.0361396	0.165801	-0.258526	0.668789	2.26716
chr2L	3960000	3970000	0.0701353	0.320654	12.0909	-0.167427	0.505957	5.28011	0.0520563	0.0902273	-0.258526	0.668789	2.26716
chr2L	3970000	3980000	0.0674894	0.288386	12.1207	-0.189805	0.383567	5.32787	0.0646689	0.0483887	-0.258526	0.668789	2.26716
chr2L	3980000	3990000	-0.0879726	0.176215	12.2638	0.0393324	0.746111	5.45324	0.0686017	0.0353419	-0.258526	0.668789	2.26716
chr2L	3990000	4000000	0.0108094	0.871499	12.1297	-0.0507513	0.831246	5.30961	0.0686017	0.0353419	-1.52154	0.474623	-4.28988
chr2L	4000000	4010000	0.0320361	0.617947	12.1786	0.0873447	0.448397	5.46801	0.0686017	0.0353419	-1.98886	0.058348	-0.442395
chr2L	4010000	4020000	-0.0467386	0.455506	12.1782	-0.0340202	0.778574	5.47591	0.0686017	0.0353419	-0.772132	0.485588	-2.85611
chr2L	4020000	4030000	-0.0227658	0.729976	12.219	-0.0649161	0.507997	5.9232	0.0686017	0.0353419	0.768079	0.230849	0.950699
chr2L	4030000	4040000	-0.0519935	0.425388	12.1407	-0.0295389	0.746247	6.32158	0.0615216	0.0639774	0.776966	0.125652	6.11986
chr2L	4040000	4050000	-0.0242532	0.688974	12.2306	-0.00138852	1	5.35716	0.0437723	0.175258	0.291665	0.493288	7.99103
chr2L	4050000	4060000	-0.07201	0.208333	12.3134	-0.140101	0.0985949	5.9557	0.0316906	0.281615	0.291665	0.493288	7.99103
chr2L	4060000	4070000	0.0535437	0.407243	12.2154	-0.261377	0.00358713	6.18076	0.0190181	0.478926	0.291665	0.493288	7.99103
chr2L	4070000	4080000	0.0233408	0.678217	12.2975	0.0144361	0.865999	5.95303	0.00628642	0.478926	0.41789	0.370824	9.22328
chr2L	4080000	4090000	-0.0960675	0.144544	12.2721	-0.153127	0.147101	5.64446	0.000294546	0.478926	0.41789	0.370824	9.22328
chr2L	4090000	4100000	-0.0513248	0.455119	12.2921	0.00295078	0.972424	5.74852	-0.00700857	0.592476	0.485522	0.311204	8.9267
chr2L	4100000	4110000	-0.0969828	0.128463	12.2057	0.105109	0.221712	5.70122	-0.00818225	0.707011	0.485522	0.311204	8.9267
chr2L	4110000	4120000	0.0871127	0.137537	12.281	-0.00470222	0.962804	5.70298	-0.00818225	0.76792	1.71078	0.195365	-3.11564
chr2L	4120000	4130000	-0.093454	0.132621	12.2795	0.173196	0.0418624	5.90597	-0.00818225	0.76792	-1.29187	0.11604	0.048474
chr2L	4130000	4140000	-0.0183799	0.757979	12.3134	0.060431	0.554878	5.54613	-0.00666786	0.707011	0	-1	0
chr2L	4140000	4150000	-0.0396299	0.468609	12.3658	-0.0134284	0.895798	5.60277	-0.0114017	0.60364	1.50452	0.265992	-1.35823
chr2L	4150000	4160000	0.0829975	0.192022	12.239	-0.0736402	0.762902	5.29815	-0.0155568	0.54994	1.50452	0.265992	-1.35823
chr2L	4160000	4170000	-0.105471	0.0698235	12.3972	0.0284911	0.785298	5.54318	-0.0119966	0.54994	4.07637	0.184562	-4.19544
chr2L	4170000	4180000	-0.100626	0.0678084	12.4548	0.041982	0.639787	5.67163	-0.00632616	0.654527	0	-1	0
chr2L	4180000	4190000	0.0132113	0.830789	12.2161	-0.0970707	0.268734	5.67802	-0.00632616	0.765478	0.894289	0.099367	3.10413
chr2L	4190000	4200000	0.0445308	0.37609	12.433	-0.0229334	0.800088	5.8778	-0.00632616	0.765478	0.858358	0.144138	3.16019
chr2L	4200000	4210000	-0.20085	0.00872691	12.6728	0.21741	0.00917488	6.2852	-0.00680529	0.662106	-0.205518	0.634412	9.49327
chr2L	4210000	4220000	-0.197329	0.00496091	12.6312	0.284198	0.00837625	6.43984	-0.0133315	0.54994	-0.205518	0.634412	9.49327
chr2L	4220000	4230000	-0.0917054	0.196044	12.6226	0.307394	0.0134366	7.15035	-0.0182243	0.533525	0.839843	0.2351	-0.00871526
chr2L	4230000	4240000	-0.124781	0.0778624	12.6074	0.110093	0.2066	5.85882	-0.019641	0.513905	0	-1	0
chr2L	4240000	4250000	-0.223478	0.00280062	12.6065	0.235303	0.00456726	6.01905	-0.0265459	0.375473	0.535096	0.831383	-3.97427
chr2L	4250000	4260000	-0.125887	0.0173646	12.5341	0.165118	0.0607294	5.93978	-0.0409581	0.187623	-1.16107	0.707924	-4.36866
chr2L	4260000	4270000	-0.149574	0.00504358	12.5301	0.0896476	0.305741	5.84801	-0.0575277	0.0736168	0.00326156	1	-4.59117
chr2L	4270000	4280000	-0.136994	0.00767081	12.5326	0.118716	0.18136	5.86661	-0.0682067	0.0295024	-0.139303	1	-3.22997
chr2L	4280000	4290000	-0.14247	0.0058462	12.4894	0.387504	0.00191427	7.03496	-0.0682067	0.0295024	0.0125306	0.976349	6.54745
chr2L	4290000	4300000	-0.159106	0.00944978	12.5562	0.116786	0.169819	5.9162	-0.0682067	0.0289489	0.0125306	0.976349	6.54745
chr2L	4300000	4310000	-0.146758	0.0389391	12.6059	0.172473	0.0550155	5.84178	-0.0682067	0.0289489	0.0125306	0.976349	6.54745
chr2L	4310000	4320000	-0.0530122	0.332504	12.5185	0.0217113	0.830367	5.58549	-0.0682067	0.0289489	0.0125306	0.976349	6.54745
chr2L	4320000	4330000	-0.0666597	0.213784	12.5255	0.101968	0.256138	5.81765	-0.0616013	0.0289489	-2.60781	0.004721	-0.653372
chr2L	4330000	4340000	-0.239541	4.56e-05	12.5751	0.321057	0.00530775	6.65457	-0.0521175	0.0470692	-2.60781	0.004721	-0.653372
chr2L	4340000	4350000	-0.178952	0.000257631	12.5167	0.253307	0.00165386	6.2562	-0.034161	0.262675	0.675256	0.207686	2.30704
chr2L	4350000	4360000	-0.177637	0.000929241	12.5734	0.208497	0.0120911	6.18113	-0.00681786	0.516258	0.793445	0.787374	-4.05155
chr2L	4360000	4370000	-0.0933301	0.0650403	12.5139	0.244077	0.0025547	6.22921	-0.00277239	0.560922	-0.507416	0.583627	-2.39578
chr2L	4370000	4380000	-0.178681	0.0028909	12.5945	0.348236	0.00525228	6.80197	0.00524284	0.560922	0.795352	0.097314	5.03632
chr2L	4380000	4390000	-0.134861	0.0176294	12.5778	0.150969	0.0658272	6.31052	0.00921938	0.609376	-1.93636	0.031561	1.49671
chr2L	4390000	4400000	-0.174808	0.0253629	12.6557	0.30475	0.00019952	6.29091	0.0113963	0.632846	-1.93636	0.031561	1.49671
chr2L	4400000	4410000	-0.111236	0.0894353	12.5983	0.22489	0.00864	5.99062	0.0113963	0.673846	0.485279	0.317542	3.00783
chr2L	4410000	4420000	0.012486	0.827048	12.5287	-0.0273895	0.777119	5.63177	0.0113963	0.673846	-1.5178	0.09774	-0.209132
chr2L	4420000	4430000	-0.102462	0.0340588	12.4866	0.0989234	0.373116	5.50599	0.0113963	0.673846	0	-1	0
chr2L	4430000	4440000	-0.0245149	0.68732	12.3294	0.0435446	0.860314	5.23549	0.00853328	0.651223	-2.35896	0.024799	-2.23915
chr2L	4440000	4450000	-0.0444039	0.410753	12.5709	0.141314	0.0790807	6.22056	0.00128511	0.651223	-2.35896	0.024799	-2.23915
chr2L	4450000	4460000	-0.050612	0.489526	12.7053	0.232779	0.0408159	6.58861	-0.00275587	0.651223	1.0179	0.149736	-0.85767
chr2L	4460000	4470000	-0.195904	0.00842295	12.6999	0.164063	0.0670847	6.36413	-0.00275587	0.605056	-0.818419	0.243188	1.01106
chr2L	4470000	4480000	-0.16398	0.000548404	12.525	0.196218	0.0234338	5.8941	-0.00782381	0.605056	-0.677317	0.114105	9.60985
chr2L	4480000	4490000	-0.253837	0.00128986	12.757	0.268377	0.00450488	6.08067	-0.0131866	0.575528	-0.677317	0.114105	9.60985
chr2L	4490000	4500000	-0.260958	0.000632723	12.7351	0.277302	0.00336229	6.25788	-0.0165789	0.495594	-0.677317	0.114105	9.60985
chr2L	4500000	4510000	-0.220988	0.00341787	12.7491	0.317671	0.000162975	6.28114	-0.0198138	0.429712	-0.677317	0.114105	9.60985
chr2L	4510000	4520000	-0.227495	0.00360516	12.6523	0.289104	0.000889825	6.12091	-0.02422	0.336757	-0.677317	0.114105	9.60985
chr2L	4520000	4530000	-0.244918	0.000242322	12.5657	0.287684	0.00139989	6.03283	-0.0291823	0.244337	-0.677317	0.114105	9.60985
chr2L	4530000	4540000	-0.0455056	0.409808	12.4187	-0.158091	0.0847426	5.88545	-0.034022	0.185382	-0.677317	0.114105	9.60985
chr2L	4540000	4550000	-0.0525607	0.431058	12.1988	-0.409214	0.000203729	5.53009	-0.0398034	0.132073	-0.677317	0.114105	9.60985
chr2L	4550000	4560000	-0.154924	0.0017916	12.5264	0.235349	0.00884671	5.97194	-0.0400439	0.132073	-0.677317	0.114105	9.60985
chr2L	4560000	4570000	-0.221821	0.000758523	12.4906	0.236739	0.00538288	6.23631	-0.0400439	0.132073	-0.677317	0.114105	9.60985
chr2L	4570000	4580000	-0.152194	0.00861589	12.3593	0.298479	0.000975924	6.35643	-0.0421131	0.132073	-0.677317	0.114105	9.60985
chr2L	4580000	4590000	-0.284114	2.68e-07	12.3043	0.270921	0.0257105	6.74138	-0.0421131	0.129037	0.0252123	0.967593	2.19388
chr2L	4590000	4600000	-0.0865415	0.14713	12.2506	0.22243	0.042965	6.45103	-0.0421131	0.129037	0.0431939	0.917489	6.90255
chr2L	4600000	4610000	0.280364	0.00117452	12.0363	-0.888565	5.72e-19	5.90001	-0.0421131	0.129037	0.986152	0.131555	1.8581
chr2L	4610000	4620000	-0.158973	0.0063307	12.2477	0.265209	0.0214584	6.61166	-0.0421131	0.129037	-1.03456	0.553781	-4.12462
chr2L	4620000	4630000	-0.156363	0.0173925	12.2623	0.248702	0.00215988	6.30618	-0.0415604	0.133562	-1.03456	0.553781	-4.12462
chr2L	4630000	4640000	-0.0988184	0.076841	12.2965	0.354494	0.00193458	6.6076	-0.0412569	0.140288	3.30085	0.352372	-4.46128
chr2L	4640000	4650000	-0.0664216	0.206237	12.4834	0.154219	0.0576158	6.04627	-0.0407509	0.145868	-2.28129	0.182055	-4.05495
chr2L	4650000	4660000	-0.118755	0.0525035	12.2455	0.247061	0.0034647	6.30368	-0.0407509	0.145868	1.76698	0.015104	0.0114667
chr2L	4660000	4670000	0.368167	1.23e-10	12.3633	-0.256377	0.002966	6.06746	-0.0407509	0.145868	-0.655417	0.250165	2.67772
chr2L	4670000	4680000	-0.0198641	0.774674	12.1594	0.0216508	0.897599	5.38411	-0.0367878	0.17839	0	-1	0
chr2L	4680000	4690000	-0.105723	0.112867	12.1999	-0.00633022	0.950555	5.67667	-0.0222822	0.433073	-6.6109	0	2.9142
chr2L	4690000	4700000	-0.158684	0.013351	12.1819	-0.0566277	0.575403	5.60609	-0.0110886	0.665674	-6.6109	0	2.9142
chr2L	4700000	4710000	-0.0865384	0.150161	12.2381	0.13819	0.101142	5.83043	-0.0107242	0.676872	-2.35315	0.013818	-1.10245
chr2L	4710000	4720000	-0.0780089	0.204748	12.2025	0.0940359	0.334094	5.57153	-0.0105144	0.676872	-2.35315	0.013818	-1.10245
chr2L	4720000	4730000	-0.000553581	1	12.174	-0.0345128	0.864253	5.3579	-0.00874869	0.691694	-2.35315	0.013818	-1.10245
chr2L	4730000	4740000	-0.111337	0.100373	12.1595	0.0927454	0.29609	5.75312	-0.00510394	0.691694	-3.30668	0.006253	-0.664243
chr2L	4740000	4750000	-0.147927	0.022474	12.2485	0.00781759	0.948764	5.46047	-0.00291628	0.691694	0	-1	0
chr2L	4750000	4760000	-0.065793	0.288979	12.2486	0.0207311	0.850454	5.48161	-0.00283064	0.691694	0	-1	0
chr2L	4760000	4770000	-0.0182767	0.7811	12.3096	0.0558287	0.613675	5.4769	-0.00647539	0.676872	-4.98602	0.101193	-3.7949
chr2L	4770000	4780000	-0.0402591	0.457454	12.4083	0.0954823	0.327381	5.59932	-0.00406235	0.691694	0	-1	0
chr2L	4780000	4790000	-0.0277206	0.620008	12.3735	0.165227	0.0666171	5.6874	-0.0025241	0.751043	0	-1	0
chr2L	4790000	4800000	-0.110341	0.0629792	12.4506	0.241933	0.00304293	6.23981	-0.0025241	0.786111	-2.5864	0.000203	4.30581
chr2L	4800000	4810000	-0.0319702	0.524941	12.5036	0.242071	0.00525791	6.33125	-0.0025241	0.786111	-2.5864	0.000203	4.30581
chr2L	4810000	4820000	-0.122913	0.0341727	12.5071	0.444663	0.000427633	7.04046	-0.00406235	0.786111	-1.72894	0.073022	-1.65681
chr2L	4820000	4830000	-0.0905163	0.0563309	12.5037	0.358028	0.00128983	6.48798	-0.00626469	0.76282	1.85068	0.002135	4.3301
chr2L	4830000	4840000	-0.0987925	0.18251	12.6699	0.275092	0.00163658	6.33649	-0.00655686	0.786111	1.21075	0.047139	3.17123
chr2L	4840000	4850000	-0.133737	0.0563254	12.6364	0.194879	0.015025	6.17803	-0.00743066	0.786111	0.743849	0.106556	4.05135
chr2L	4850000	4860000	-0.0260209	0.589714	12.5229	0.135192	0.116001	5.93147	-0.00794964	0.76282	0.556332	0.199098	4.48804
chr2L	4860000	4870000	0.0437442	0.456377	12.5915	0.2126	0.0170385	5.79331	-0.00743066	0.786111	-0.0884569	0.88786	1.3915
chr2L	4870000	4880000	0.159745	0.00206257	12.4283	0.192097	0.0621114	5.51021	-0.00743066	0.765187	0.822535	0.102112	4.46606
chr2L	4880000	4890000	-0.0726192	0.213618	12.5686	0.285916	0.0096743	6.50652	-0.00794964	0.765187	0.822535	0.102112	4.46606
chr2L	4890000	4900000	-0.0812409	0.178474	12.5706	0.188487	0.0166962	6.2718	-0.00947607	0.754402	1.04476	0.031559	4.32756
chr2L	4900000	4910000	0.000603383	0.999232	12.4566	0.180227	0.0364622	6.12277	-0.0125073	0.707216	-2.0627	0.028178	0.499371
chr2L	4910000	4920000	-0.00146071	0.987858	12.5879	0.0449964	0.585142	6.04834	-0.0125073	0.707216	-0.204206	0.666027	4.88485
chr2L	4920000	4930000	-0.0404485	0.565459	12.7951	-0.210279	0.0111891	6.02827	-0.0125073	0.707216	-0.204206	0.666027	4.88485
chr2L	4930000	4940000	0.114157	0.103694	12.7333	0.00788363	0.926525	5.69907	-0.0140717	0.654856	-1.515	0.138565	-1.16067
chr2L	4940000	4950000	-0.0834185	0.229725	12.6678	0.166111	0.0393296	6.12993	-0.0159538	0.562399	-2.41682	0.071892	3.72021
chr2L	4950000	4960000	-0.0888988	0.0592937	12.4697	0.169248	0.0469289	5.8456	-0.0190518	0.459984	-3.07212	0.022905	2.74049
chr2L	4960000	4970000	-0.166179	0.0300558	12.6792	0.202083	0.0642809	6.49746	-0.0202625	0.455856	0.500872	0.248741	4.68876
chr2L	4970000	4980000	-0.175322	0.00512039	12.5774	0.150161	0.175613	6.49824	-0.0237884	0.384911	0.65335	0.171801	3.97912
chr2L	4980000	4990000	-0.110601	0.106998	12.6032	0.219394	0.00678986	6.16877	-0.0277835	0.372665	0.305718	0.471906	5.83199
chr2L	4990000	5000000	-0.0450617	0.369647	12.4945	0.287129	0.0136342	6.58238	-0.0237884	0.434973	0.931927	0.040585	7.84055
chr2L	5000000	5010000	-0.130616	0.0544692	12.6176	0.307293	0.00597198	6.56303	-0.0237884	0.434973	0.931927	0.040585	7.84055
chr2L	5010000	5020000	-0.167873	0.0380011	12.7394	0.182742	0.042233	6.04232	-0.0237884	0.434973	-1.92987	0.003038	6.1584
chr2L	5020000	5030000	0.0741709	0.118255	12.4468	0.125296	0.15624	5.81821	-0.0202625	0.455856	-1.92987	0.003038	6.1584
chr2L	5030000	5040000	-0.125659	0.152041	12.8074	0.258672	0.00454132	5.86617	-0.0133382	0.499922	-1.86958	0.005365	6.41915
chr2L	5040000	5050000	-0.169221	0.000623759	12.543	0.22801	0.0172656	6.36612	-0.00198802	0.499922	1.27048	0.017596	4.96161
chr2L	5050000	5060000	-0.169987	0.0137991	12.6662	0.20843	0.0653593	6.60928	0.00163379	0.628385	3.66782	0.002443	0.981538
chr2L	5060000	5070000	0.153034	0.0276377	12.6289	-0.0467652	0.598894	5.72072	0.00163379	0.782009	0.536099	0.357862	1.74298
chr2L	5070000	5080000	-0.00816535	0.879158	12.4652	0.157486	0.0677642	5.96644	0.00312879	0.782009	1.08309	0.022522	6.9442
chr2L	5080000	5090000	-0.0542077	0.273154	12.4563	-0.0105253	0.909402	5.77355	0.00673587	0.782009	1.08309	0.022522	6.9442
chr2L	5090000	5100000	-0.0255778	0.619184	12.5333	0.276628	0.0101034	6.46761	0.0120375	0.628385	1.08309	0.022522	6.9442
chr2L	5100000	5110000	0.194399	6.69e-05	12.55	0.068894	0.411215	6.08131	0.0170787	0.457748	-0.601491	0.155962	8.56779
chr2L	5110000	5120000	0.0228945	0.715104	12.3846	-0.0152343	0.875457	5.65717	0.0206504	0.355216	-0.601491	0.155962	8.56779
chr2L	5120000	5130000	-0.081697	0.236855	12.638	0.164024	0.059899	6.12551	0.0220202	0.326663	-0.601491	0.155962	8.56779
chr2L	5130000	5140000	-0.179059	0.0180768	12.7256	0.27121	0.0011178	6.30751	0.0225607	0.318072	-0.601491	0.155962	8.56779
chr2L	5140000	5150000	-0.0959003	0.0357878	12.4938	0.0696258	0.534725	6.59188	0.0239725	0.289552	-0.601491	0.155962	8.56779
chr2L	5150000	5160000	-0.00850446	0.871668	12.4948	-0.0444151	0.620806	5.76406	0.0281389	0.225829	-0.601491	0.155962	8.56779
chr2L	5160000	5170000	0.623266	3.55e-19	13.0052	-0.376142	0.000215851	5.64183	0.0311135	0.185323	-0.461521	0.281086	10.9394
chr2L	5170000	5180000	0.682798	2.65e-21	12.9045	-0.359226	5.82e-05	5.82143	0.0311135	0.185323	-0.461521	0.281086	10.9394
chr2L	5180000	5190000	0.207389	0.00702683	12.8013	0.0436978	0.604659	6.09788	0.0283162	0.225829	-0.768548	0.073075	8.21323
chr2L	5190000	5200000	-0.171286	0.0148231	12.7095	0.216822	0.00945963	6.20143	0.0239725	0.289552	-0.768548	0.073075	8.21323
chr2L	5200000	5210000	-0.0756988	0.28376	13.2184	-0.00590496	0.965764	6.71012	0.0220629	0.321696	-1.4503	0.035219	-0.265811
chr2L	5210000	5220000	-0.0938144	0.181294	12.7924	0.187608	0.0236357	6.3133	0.0188482	0.431054	-1.67765	0.05235	1.07613
chr2L	5220000	5230000	-0.0975284	0.119586	12.599	0.245375	0.0226419	6.45887	0.0145544	0.57218	0.670904	0.124299	8.05461
chr2L	5230000	5240000	-0.0811962	0.0939918	12.4953	0.261653	0.0347382	6.98636	0.0130527	0.658524	0.670904	0.124299	8.05461
chr2L	5240000	5250000	-0.205631	6.92e-05	12.5549	0.302534	0.0094312	6.70013	0.0120134	0.712684	0.670904	0.124299	8.05461
chr2L	5250000	5260000	-0.204065	0.000121633	12.5581	0.435397	0.00105873	7.60342	0.0112513	0.737214	0.0693052	0.913114	1.60795
chr2L	5260000	5270000	-0.0217765	0.72322	12.4329	0.297499	0.00112676	6.37798	0.00817471	0.80442	0.215418	0.66554	2.84717
chr2L	5270000	5280000	-0.0531844	0.281865	12.5408	0.0778771	0.361414	6.19083	0.00239475	0.80442	0.999253	0.049076	4.86631
chr2L	5280000	5290000	-0.10315	0.0619562	12.5081	0.425439	0.000309424	6.76642	-0.00120813	0.805573	0.999253	0.049076	4.86631
chr2L	5290000	5300000	-0.0198883	0.703051	12.4303	0.412903	0.0014351	7.0633	0.000404505	0.805573	0.817298	0.37702	-2.20871
chr2L	5300000	5310000	-0.140935	0.0148969	12.5742	0.473537	6.24e-05	6.68986	0.00346194	0.805573	0.781611	0.141069	5.72228
chr2L	5310000	5320000	-0.189311	0.000280788	12.5073	0.151774	0.0850336	5.87282	0.00346194	0.8125	0.876759	0.085797	6.9777
chr2L	5320000	5330000	-0.165	0.0277698	12.6325	0.224165	0.0393482	6.47024	0.00346194	0.8125	0.876759	0.085797	6.9777
chr2L	5330000	5340000	-0.0568122	0.270214	12.4564	0.137794	0.108762	5.70478	0.00346194	0.761971	-2.23959	0.020291	1.03781
chr2L	5340000	5350000	0.101895	0.0446686	12.4606	-0.280671	0.00149246	5.81055	-5.82e-05	0.761971	-2.09938	0.030953	-0.769827
chr2L	5350000	5360000	-0.124951	0.0276302	12.5963	0.272153	0.00243629	6.05643	-0.00448292	0.749338	-2.09938	0.030953	-0.769827
chr2L	5360000	5370000	-0.0284227	0.55312	12.5042	0.095383	0.29181	5.94872	-0.0110957	0.740602	-2.09938	0.030953	-0.769827
chr2L	5370000	5380000	-0.0565124	0.405557	12.6125	0.322514	0.00228536	6.40047	-0.015945	0.571227	1.47806	0.383446	-2.80416
chr2L	5380000	5390000	-0.140456	0.0077011	12.4084	0.245418	0.00472875	5.85736	-0.0244252	0.373227	1.47806	0.383446	-2.80416
chr2L	5390000	5400000	-0.15264	0.00224691	12.4342	0.202535	0.0220733	5.7846	-0.0269689	0.370206	0	-1	0
chr2L	5400000	5410000	-0.151843	0.0222088	12.2695	0.24233	0.00330966	6.15913	-0.0285933	0.358435	0.405779	0.60149	-0.556884
chr2L	5410000	5420000	-0.116387	0.0356663	12.3314	0.286528	0.000588975	5.7332	-0.0296176	0.327351	0.405779	0.60149	-0.556884
chr2L	5420000	5430000	-0.13039	0.0191105	12.3613	0.295812	0.00862439	6.60154	-0.0299129	0.289598	0	-1	0
chr2L	5430000	5440000	-0.075379	0.167268	12.3543	0.2996	0.000229642	6.29962	-0.0301716	0.289598	2.56801	0.581412	-4.59866
chr2L	5440000	5450000	-0.0367667	0.591763	12.2415	0.130566	0.135991	5.81841	-0.0301716	0.32081	0	-1	0
chr2L	5450000	5460000	-0.127151	0.0374463	12.2791	-0.0148393	0.890463	5.62996	-0.0311485	0.32081	0	-1	0
chr2L	5460000	5470000	-0.131881	0.0174815	12.3654	0.185996	0.0247706	6.17188	-0.0323074	0.32081	1.18328	0.053265	1.98793
chr2L	5470000	5480000	-0.0856434	0.132101	12.332	0.181906	0.0425956	5.90368	-0.0379409	0.278944	0	-1	0
chr2L	5480000	5490000	-0.0924265	0.130956	12.361	0.244894	0.0027421	6.21717	-0.0437751	0.241704	3.13606	0.335159	-4.49433
chr2L	5490000	5500000	-0.102808	0.057259	12.4482	0.247204	0.00195636	6.234	-0.0454919	0.190133	1.47863	0.740113	-4.32898
chr2L	5500000	5510000	-0.0607176	0.223066	12.4608	0.256384	0.0016213	6.27086	-0.0532587	0.116583	0	-1	0
chr2L	5510000	5520000	-0.0340007	0.522801	12.3855	0.0895339	0.292355	5.69682	-0.0607432	0.0913728	0.418493	0.423966	2.47395
chr2L	5520000	5530000	-0.162146	0.0162783	12.6183	0.115342	0.286663	6.45927	-0.0643308	0.0806913	1.19727	0.027611	5.09204
chr2L	5530000	5540000	-0.164469	0.0178948	12.6017	0.254799	0.00311271	6.14026	-0.0643308	0.0806913	0.494068	0.233262	7.40867
chr2L	5540000	5550000	-0.084193	0.0682991	12.4753	0.0908844	0.424935	6.59318	-0.0660479	0.0685929	0.739806	0.127906	8.30778
chr2L	5550000	5560000	-0.0739427	0.110616	12.5136	0.12756	0.117772	6.02371	-0.0660479	0.0685929	-1.94863	0.073542	-0.377147
chr2L	5560000	5570000	-0.00888501	0.869757	12.4209	0.0744557	0.411042	5.70611	-0.0660479	0.0685929	3.78373	0.159153	-4.32039
chr2L	5570000	5580000	0.0335272	0.581436	12.3825	0.045691	0.656214	5.56472	-0.0636362	0.0743511	-1.85908	0.261093	-3.83679
chr2L	5580000	5590000	-0.00886581	0.864052	12.4991	0.0622897	0.466048	5.83911	-0.0604478	0.071415	-1.85908	0.261093	-3.83679
chr2L	5590000	5600000	-0.143921	0.00403388	12.4106	0.0978769	0.271492	5.70255	-0.0621649	0.0565035	0.940333	0.486084	-2.53831
chr2L	5600000	5610000	0.00702719	0.909451	12.3948	0.163565	0.0812815	5.64093	-0.0621649	0.0565035	-2.22844	0.025478	-2.12335
chr2L	5610000	5620000	-0.0277003	0.610591	12.3518	0.091045	0.418808	5.46892	-0.0585957	0.0577197	-2.22844	0.025478	-2.12335
chr2L	5620000	5630000	-0.104325	0.0770289	12.3514	0.0606479	0.507417	5.64228	-0.0558304	0.0669942	-2.14235	0.05829	-2.57192
chr2L	5630000	5640000	0.0107258	0.845605	12.4239	0.105408	0.242936	5.67036	-0.0520964	0.0669942	-1.72235	0.060296	-1.86644
chr2L	5640000	5650000	-0.108215	0.0774781	12.3891	0.0619661	0.525084	5.58276	-0.0497518	0.0772859	-1.72235	0.060296	-1.86644
chr2L	5650000	5660000	0.04675	0.429986	12.2605	0.107192	0.456341	5.41081	-0.0520964	0.0773575	-1.86504	0.075351	-2.00014
chr2L	5660000	5670000	-0.0301814	0.593142	12.3638	0.00211216	0.98519	5.4174	-0.0536	0.0669942	0.44982	0.723293	-0.884845
chr2L	5670000	5680000	-0.0642879	0.206442	12.4589	0.191831	0.0435181	5.71687	-0.0536	0.0669942	0.44982	0.723293	-0.884845
chr2L	5680000	5690000	0.00638966	0.913503	12.3529	0.0474304	0.624562	5.58973	-0.0536	0.0773575	0	-1	0
chr2L	5690000	5700000	0.0222999	0.683388	12.3388	0.0152946	0.9195	5.40576	-0.0509429	0.0989337	-1.32383	0.703228	-4.39115
chr2L	5700000	5710000	-0.0853711	0.127524	12.3772	0.0466407	0.799247	5.36544	-0.0474947	0.120757	-2.44148	0.043418	-2.26821
chr2L	5710000	5720000	-0.0396858	0.429567	12.4927	0.0737174	0.437773	5.65435	-0.0436303	0.126329	-2.44148	0.043418	-2.26821
chr2L	5720000	5730000	-0.0996752	0.06444	12.5614	0.241595	0.00284585	6.13414	-0.0402647	0.132614	-1.33811	0.268186	-2.39821
chr2L	5730000	5740000	-0.0196624	0.678577	12.5015	0.18907	0.0252035	5.9007	-0.0387152	0.15795	-0.0381497	0.933958	4.46891
chr2L	5740000	5750000	-0.0976917	0.038092	12.4744	0.129319	0.143793	5.76159	-0.0371874	0.15795	-0.0381497	0.933958	4.46891
chr2L	5750000	5760000	-0.158517	0.0016476	12.4879	0.109739	0.195697	5.82999	-0.0346096	0.193304	0.825643	0.103885	4.36458
chr2L	5760000	5770000	-0.00914935	0.899759	12.3376	0.0166987	0.880773	5.48545	-0.0339529	0.215447	-3.55234	8e-06	2.62375
chr2L	5770000	5780000	-0.0601946	0.268181	12.4648	0.0606828	0.483037	5.779	-0.030062	0.262802	0.936959	0.354194	-3.0554
chr2L	5780000	5790000	-0.133017	0.0101923	12.5147	0.0405395	0.652044	5.81744	-0.030062	0.290455	0.452621	0.329547	4.00654
chr2L	5790000	5800000	-0.0367154	0.497754	12.3611	-0.0350398	0.735173	5.59717	-0.0267658	0.321402	0.452621	0.329547	4.00654
chr2L	5800000	5810000	-0.0822035	0.198795	12.5837	0.30732	0.00139289	6.38483	-0.0292574	0.306333	0.717742	0.198845	2.95305
chr2L	5810000	5820000	0.0106661	0.835708	12.4518	-0.0970776	0.655709	5.32554	-0.0325446	0.290455	5.39885	0.030395	-3.68185
chr2L	5820000	5830000	0.182192	0.00720899	12.3283	-0.527209	8.72e-09	5.693	-0.0335911	0.249771	0.39954	0.384918	3.99388
chr2L	5830000	5840000	0.281477	0.000190089	12.3436	-1.47259	1.43e-50	6.02547	-0.0335911	0.249771	-3.11718	0.340003	-4.48556
chr2L	5840000	5850000	-0.0215874	0.664484	12.4392	0.00330483	0.977558	5.44681	-0.0342478	0.2431	0.165136	0.689872	7.33866
chr2L	5850000	5860000	-0.0922134	0.0561671	12.5547	0.169646	0.0495453	5.82441	-0.0399347	0.246594	0.389109	0.401943	3.55512
chr2L	5860000	5870000	-0.0928459	0.0473314	12.5163	0.0607787	0.474507	5.73085	-0.0460508	0.21161	0.389109	0.401943	3.55512
chr2L	5870000	5880000	-0.0735766	0.149227	12.5413	0.193052	0.0146763	6.28081	-0.0470569	0.202758	0.389109	0.401943	3.55512
chr2L	5880000	5890000	0.0066079	0.925378	12.3594	0.0624893	0.485015	5.6459	-0.0488629	0.154411	-3.18325	0.345838	-4.47207
chr2L	5890000	5900000	-0.0740857	0.204375	12.342	0.016713	0.870052	5.56672	-0.0488629	0.118294	-1.5957	0.475214	-4.29287
chr2L	5900000	5910000	-0.115393	0.0177024	12.4819	0.284942	0.000487621	6.29858	-0.0488629	0.118294	0.362472	0.550103	1.20436
chr2L	5910000	5920000	-0.216924	0.00292389	12.6153	0.269483	0.0013166	6.08641	-0.0470569	0.132443	0.708934	0.19871	2.78251
chr2L	5920000	5930000	-0.0624148	0.259134	12.3178	0.208762	0.0158607	5.74051	-0.0465658	0.132443	0.708934	0.19871	2.78251
chr2L	5930000	5940000	-0.104682	0.0422613	12.4514	0.0686169	0.486995	5.55826	-0.0460508	0.118294	-0.819541	0.542857	-3.27945
chr2L	5940000	5950000	-0.0145734	0.847191	12.7468	0.0676546	0.419129	6.19527	-0.0454381	0.132443	2.6029	0.004506	3.28931
chr2L	5950000	5960000	-0.00856425	0.870873	12.509	0.21274	0.0153351	5.98321	-0.0435671	0.132443	8.18178	1.9e-05	2.25206
chr2L	5960000	5970000	-0.0243965	0.639261	12.5458	0.233732	0.00554903	5.99978	-0.0420682	0.132443	8.18178	1.9e-05	2.25206
chr2L	5970000	5980000	-0.184619	0.00428846	12.6016	0.391178	0.00184345	7.06116	-0.0399898	0.13938	1.67564	0.004424	8.71032
chr2L	5980000	5990000	-0.17041	0.0137169	12.6353	0.382177	0.00256975	7.0515	-0.0367448	0.142233	1.67564	0.004424	8.71032
chr2L	5990000	6000000	-0.140542	0.0359089	12.6027	0.403174	0.000363078	6.53313	-0.0298956	0.240548	0.582575	0.185746	7.24025
chr2L	6000000	6010000	-0.0177776	0.738094	12.4744	0.183434	0.027989	5.96641	-0.0231986	0.361037	1.83352	0.011134	3.07524
chr2L	6010000	6020000	-0.0549513	0.274932	12.5122	0.270514	0.000794508	6.07786	-0.0197196	0.410186	1.22874	0.062115	0.685272
chr2L	6020000	6030000	-0.0661667	0.161521	12.5041	0.238087	0.00443772	6.30378	-0.0144379	0.504522	-1.37002	0.157137	-2.6952
chr2L	6030000	6040000	-0.16411	0.0296247	12.6241	0.202969	0.0131423	6.30777	-0.00977032	0.606363	-1.37002	0.157137	-2.6952
chr2L	6040000	6050000	-0.186702	0.00586611	12.6144	0.251382	0.0260555	6.53466	-0.0043741	0.606363	0.59978	0.179959	4.9928
chr2L	6050000	6060000	-0.147395	0.0452286	12.6763	0.245702	0.00238902	6.26347	0.000877693	0.606363	0.938952	0.054468	7.69071
chr2L	6060000	6070000	-0.168444	0.00267517	12.5826	0.172625	0.107041	6.41898	0.00310953	0.606363	1.78069	0.009502	3.05711
chr2L	6070000	6080000	-0.0513065	0.305598	12.5053	0.174614	0.0431259	6.31351	0.00833638	0.606363	0.969772	0.04868	4.8378
chr2L	6080000	6090000	-0.0443317	0.419335	12.4706	0.386682	0.00274003	7.33082	0.0107223	0.606363	0.420863	0.329517	6.9642
chr2L	6090000	6100000	-0.090265	0.173519	12.6133	0.121067	0.13931	6.08313	0.0131849	0.56844	0.491497	0.304533	3.27129
chr2L	6100000	6110000	-0.0096431	0.86965	12.364	0.0790058	0.326496	6.06701	0.013639	0.56844	1.00104	0.036904	4.28291
chr2L	6110000	6120000	0.0286783	0.589349	12.4382	-0.0531889	0.630998	5.51609	0.016315	0.556352	0.586457	0.167906	6.19616
chr2L	6120000	6130000	-0.0301781	0.662547	12.6135	0.168942	0.0382356	6.25395	0.016315	0.556352	1.1824	0.018135	7.91938
chr2L	6130000	6140000	-0.087515	0.11183	12.4595	0.123484	0.200082	5.59826	0.0189534	0.519311	3.47658	0.307183	-4.43807
chr2L	6140000	6150000	-0.0706443	0.199265	12.5681	0.168471	0.0616376	5.90036	0.0189534	0.525422	0.39803	0.741675	-1.45441
chr2L	6150000	6160000	0.0792169	0.249324	12.692	0.0547195	0.537874	5.91102	0.0162344	0.525422	-1.41576	0.145318	2.06383
chr2L	6160000	6170000	-0.00379848	0.955736	12.4007	0.340097	8.46e-05	6.32035	0.0110958	0.499068	1.85659	0.211494	-3.67004
chr2L	6170000	6180000	-0.0627931	0.240689	12.438	0.215929	0.0105804	6.13095	0.00743789	0.381216	1.27774	0.011376	6.6241
chr2L	6180000	6190000	-0.125781	0.0317583	12.4617	0.319527	0.000159289	6.28495	0.0043395	0.298247	2.04737	0.008981	1.53016
chr2L	6190000	6200000	-0.212253	6.59e-05	12.4651	0.414169	0.000412075	6.67422	-0.0166309	0.248253	1.27774	0.011376	6.6241
chr2L	6200000	6210000	-0.153884	0.00486939	12.4588	0.204431	0.0181655	5.95319	-0.0373908	0.23006	1.27774	0.011376	6.6241
chr2L	6210000	6220000	0.0301068	0.59887	12.3357	-0.00655031	0.953731	5.62863	-0.0434604	0.140848	1.27774	0.011376	6.6241
chr2L	6220000	6230000	0.00156364	0.985497	12.2914	0.0316281	0.757052	5.56599	-0.05495	0.0616076	-4.36522	0.001751	-0.512768
chr2L	6230000	6240000	0.0163227	0.793496	12.2646	0.0134134	0.898635	5.50341	-0.0805074	0.0187209	-0.218588	1	-3.99889
chr2L	6240000	6250000	0.0401382	0.481678	12.2898	0.119884	0.215292	5.62924	-0.113878	0.00707206	0	-1	0
chr2L	6250000	6260000	-0.0939868	0.128317	12.2733	0.171892	0.0429328	5.96345	-0.113878	0.00707206	0.842402	0.266711	-0.985354
chr2L	6260000	6270000	-0.051054	0.281584	12.4851	0.157908	0.0777169	5.83892	-0.113878	0.00707206	1.43012	0.072582	-1.4633
chr2L	6270000	6280000	-0.082491	0.163211	12.3317	0.182611	0.0294397	5.94836	-0.113878	0.00707206	1.23216	0.132832	-1.52478
chr2L	6280000	6290000	-0.0167563	0.792337	12.2639	0.114752	0.235022	5.58397	-0.113878	0.00707206	0.167044	0.734222	2.78494
chr2L	6290000	6300000	-0.0719234	0.194152	12.3637	0.138745	0.119964	5.71559	-0.101156	0.0361619	0.167044	0.734222	2.78494
chr2L	6300000	6310000	-0.101852	0.0955132	12.3397	0.063466	0.582942	5.46957	-0.0733871	0.0670031	-0.505894	0.657426	-2.54266
chr2L	6310000	6320000	0.0234138	0.66292	12.3691	-0.0315435	0.865205	5.37892	-0.0721379	0.0796773	-0.566376	0.553739	-2.866
chr2L	6320000	6330000	-0.108755	0.0283509	12.4562	0.227734	0.00683354	6.18018	-0.0661184	0.126764	1.08726	0.088747	1.59434
chr2L	6330000	6340000	-0.120271	0.0473551	12.5835	0.247537	0.0303165	6.44173	-0.0554945	0.201322	0.624309	0.183338	4.33795
chr2L	6340000	6350000	-0.101669	0.0315156	12.4988	0.171254	0.0448455	5.82516	-0.0492694	0.216613	-3.83066	0.002851	-1.27736
chr2L	6350000	6360000	-0.0733293	0.124178	12.4623	0.172573	0.0484149	5.7919	-0.0492694	0.216613	-3.83066	0.002851	-1.27736
chr2L	6360000	6370000	-0.0383743	0.526827	12.2359	-0.0215286	0.837032	5.55504	-0.0492694	0.216613	0.653371	0.202688	3.06441
chr2L	6370000	6380000	-0.143807	0.00326433	12.506	0.270766	0.0036216	5.82207	-0.0492694	0.216613	3.4137	0.006583	0.728222
chr2L	6380000	6390000	-0.197504	0.000135876	12.554	0.183488	0.0513572	5.9498	-0.0492694	0.216613	-1.19156	0.347348	1.25351
chr2L	6390000	6400000	-0.0799142	0.0939447	12.537	0.104869	0.271295	5.83936	-0.0544601	0.123785	-2.44889	0.024842	-2.2016
chr2L	6400000	6410000	-0.0320045	0.555542	12.4468	0.0143901	0.884934	5.54076	-0.0539669	0.123785	1.9292	0.173741	-3.0237
chr2L	6410000	6420000	-0.188614	0.00808707	12.6389	0.344522	0.00152042	6.39968	-0.0539669	0.123785	-2.1081	0.003025	5.17247
chr2L	6420000	6430000	0.000116786	1	12.4883	-0.265297	0.00181959	6.2543	-0.0539669	0.123785	-2.1081	0.003025	5.17247
chr2L	6430000	6440000	0.558091	1.08e-11	12.2099	-2.28797	2.62e-101	6.1149	-0.0539669	0.0641562	0.452544	0.364048	3.58535
chr2L	6440000	6450000	0.204621	0.00228642	12.3433	-0.75312	1.8e-16	6.20884	-0.0532974	0.0553638	-0.192476	0.713922	2.75391
chr2L	6450000	6460000	-0.147086	0.0370178	12.6448	0.181222	0.0244387	6.20933	-0.045798	0.0669949	0.924905	0.108877	2.2325
chr2L	6460000	6470000	-0.0575421	0.283806	12.4555	0.361883	4.85e-05	6.35218	-0.0414146	0.103232	0.924905	0.108877	2.2325
chr2L	6470000	6480000	-0.0523724	0.310779	12.568	0.312577	0.00629791	6.56743	-0.0340379	0.188591	0.796758	0.057137	8.0841
chr2L	6480000	6490000	-0.232123	0.000832354	12.7115	0.31841	0.00717406	6.72994	-0.0286721	0.261296	0.796758	0.057137	8.0841
chr2L	6490000	6500000	-0.116896	0.0594261	12.58	0.368983	0.000576221	6.4226	-0.027643	0.310049	0.593048	0.205376	3.98325
chr2L	6500000	6510000	-0.0477062	0.36215	12.4621	0.0467383	0.583956	5.68965	-0.0280679	0.310049	0.198307	0.667653	3.6537
chr2L	6510000	6520000	-0.0232982	0.706604	12.2086	-0.0300979	0.748086	5.65821	-0.0273202	0.319822	0.612887	0.19723	4.53159
chr2L	6520000	6530000	-0.0113365	0.837086	12.4187	0.148727	0.0808089	5.77513	-0.0272644	0.357858	1.43618	0.004251	4.11295
chr2L	6530000	6540000	-0.0435817	0.475911	12.5422	0.324867	0.00261768	6.40013	-0.0255663	0.39102	1.43618	0.004251	4.11295
chr2L	6540000	6550000	-0.152696	0.00451307	12.5646	0.312771	0.000305839	6.23781	-0.0228895	0.422247	1.43618	0.004251	4.11295
chr2L	6550000	6560000	-0.0684727	0.263951	12.5034	0.299336	0.00631489	6.47016	-0.0207837	0.426139	0.996363	0.054312	5.10659
chr2L	6560000	6570000	0.0193168	0.739324	12.5029	0.257253	0.00159332	6.24883	-0.0196238	0.449962	-2.16608	0.01408	0.626603
chr2L	6570000	6580000	-0.072099	0.135969	12.5437	0.104042	0.276356	5.59198	-0.00941701	0.520958	-2.16608	0.01408	0.626603
chr2L	6580000	6590000	-0.0126751	0.814364	12.4549	0.085396	0.445637	5.51441	0.00170163	0.571436	-2.16608	0.01408	0.626603
chr2L	6590000	6600000	-0.0152967	0.782565	12.3622	-0.0418019	0.861817	5.31677	0.00420051	0.623561	-2.16608	0.01408	0.626603
chr2L	6600000	6610000	-0.0951153	0.0542606	12.5065	0.0244981	0.85304	5.42944	0.00603558	0.623561	-2.16608	0.01408	0.626603
chr2L	6610000	6620000	-0.118967	0.0174775	12.4317	0.34603	0.0022859	6.53558	0.0101154	0.623561	0.932915	0.050482	4.5134
chr2L	6620000	6630000	-0.0324405	0.501512	12.5335	0.0468088	0.595998	5.78209	0.0101154	0.7237	-0.821619	0.396301	-0.83374
chr2L	6630000	6640000	-0.0836755	0.0952627	12.5196	0.119614	0.16977	5.8493	0.0101154	0.623561	-0.821619	0.396301	-0.83374
chr2L	6640000	6650000	-0.118714	0.0177494	12.4441	0.0981382	0.360454	6.41946	0.00723056	0.623561	0.873683	0.135984	4.35277
chr2L	6650000	6660000	-0.232777	0.00108152	12.6118	0.203721	0.0109147	6.28491	0.00551621	0.614672	-2.19621	0.107625	0.0290443
chr2L	6660000	6670000	-0.250735	0.000702133	12.6706	0.358235	0.00146319	6.55023	0.00551621	0.548044	2.08576	0.012185	3.69575
chr2L	6670000	6680000	-0.074073	0.164314	12.5462	0.282726	0.0104568	6.48202	-0.00755832	0.436196	2.08576	0.012185	3.69575
chr2L	6680000	6690000	-0.0726355	0.292144	12.6388	0.19449	0.0168529	6.15153	-0.0269665	0.253859	0.589045	0.199432	5.05803
chr2L	6690000	6700000	-0.132408	0.0235681	12.5675	0.31166	0.00441677	6.48036	-0.0522204	0.0930034	-0.0406875	0.923396	5.88421
chr2L	6700000	6710000	-0.150643	0.00270757	12.5494	0.322402	0.00366323	6.51809	-0.07722	0.00947389	-0.0406875	0.923396	5.88421
chr2L	6710000	6720000	-0.094769	0.0521219	12.4854	0.124931	0.129923	6.05852	-0.0837175	0.00711862	1.43727	0.013054	5.64247
chr2L	6720000	6730000	-0.128089	0.0369615	12.5743	0.205479	0.0125478	6.25125	-0.0913701	0.00547864	1.43727	0.013054	5.64247
chr2L	6730000	6740000	-0.0618182	0.277983	12.5527	0.230823	0.00682398	5.8966	-0.0996731	0.00547864	0.834268	0.092969	6.38704
chr2L	6740000	6750000	-0.00951361	0.864222	12.3823	0.103195	0.258495	5.63701	-0.103408	0.00519301	-1.81483	0.091708	-2.57132
chr2L	6750000	6760000	-0.104049	0.0414703	12.4989	0.16782	0.0481346	5.83974	-0.103408	0.00519301	-2.24298	0.012109	0.308929
chr2L	6760000	6770000	-0.187686	0.00640356	12.623	0.188648	0.0261781	6.09156	-0.103408	0.00519301	-2.24298	0.012109	0.308929
chr2L	6770000	6780000	-0.126088	0.0187162	12.3602	0.108796	0.248106	5.64922	-0.103408	0.00519301	-2.24298	0.012109	0.308929
chr2L	6780000	6790000	-0.139156	0.0177495	12.5009	0.11495	0.283584	6.39958	-0.0996731	0.00646634	1.11932	0.02176	6.25843
chr2L	6790000	6800000	-0.0211453	0.694767	12.4724	0.256196	0.0293257	6.70289	-0.0825395	0.0292212	0.626715	0.176671	6.71691
chr2L	6800000	6810000	-0.0731019	0.181719	12.4685	0.184199	0.0288338	5.72534	-0.058128	0.0827437	-3.63605	0.059251	-3.35581
chr2L	6810000	6820000	-0.0168943	0.745232	12.4469	0.0664399	0.43641	5.72217	-0.0495229	0.10475	0.130453	1	-4.5603
chr2L	6820000	6830000	-0.11599	0.0226383	12.4765	0.188536	0.0314149	5.74028	-0.0381821	0.193493	-1.5535	0.065684	-0.591244
chr2L	6830000	6840000	-0.105274	0.0765979	12.3934	0.2763	0.00202456	5.68051	-0.0294546	0.306457	-1.5535	0.065684	-0.591244
chr2L	6840000	6850000	-0.06861	0.165552	12.4888	0.0679754	0.427773	5.68346	-0.0277788	0.306457	0	-1	0
chr2L	6850000	6860000	-0.197868	0.000281687	12.507	0.238543	0.00311241	6.15613	-0.0223425	0.386098	0.470179	0.305008	3.83905
chr2L	6860000	6870000	0.0490499	0.325092	12.4488	0.0730253	0.453496	5.6006	-0.0144955	0.413347	0.177663	0.675077	6.23026
chr2L	6870000	6880000	0.205231	4.06e-05	12.442	0.0421261	0.620372	5.73625	-0.0066369	0.494989	0.509908	0.303508	4.89746
chr2L	6880000	6890000	0.320758	8.04e-09	12.3226	0.00591786	0.947558	5.65587	0.00214253	0.494989	0.509908	0.303508	4.89746
chr2L	6890000	6900000	0.0307416	0.520965	12.5178	0.0641651	0.518927	5.56148	0.00855592	0.50587	0.45825	0.350633	4.99666
chr2L	6900000	6910000	0.0206451	0.702722	12.5298	0.0962887	0.245062	6.0788	0.0115742	0.50587	1.47718	0.023863	3.41592
chr2L	6910000	6920000	-0.22996	2.31e-05	12.4914	0.283842	0.00982183	6.52478	0.0130034	0.50587	1.07977	0.037948	6.58115
chr2L	6920000	6930000	-0.150804	0.010018	12.4845	0.0410885	0.651504	6.26244	0.019276	0.50587	1.07653	0.033342	9.70005
chr2L	6930000	6940000	-0.0340089	0.638321	12.6615	0.221858	0.00710339	6.04859	0.025961	0.34393	-2.52244	0.007974	0.854951
chr2L	6940000	6950000	-0.0795956	0.0950657	12.5239	0.245027	0.00416421	6.32327	0.0264957	0.34393	-2.52244	0.007974	0.854951
chr2L	6950000	6960000	-0.105008	0.0909896	12.5997	0.118617	0.201035	6.37577	0.0370324	0.189339	0.492778	0.34158	2.44431
chr2L	6960000	6970000	-0.100752	0.156708	12.6804	0.16164	0.148197	6.56883	0.0370324	0.189339	2.23795	0.002102	8.487
chr2L	6970000	6980000	-0.387484	6.89e-07	12.8037	0.253783	0.0016919	6.09403	0.0441801	0.0946213	0.545527	0.236321	5.53253
chr2L	6980000	6990000	-0.107272	0.132424	12.5998	0.281958	0.000487557	6.24159	0.0441801	0.0946213	-0.329543	0.469714	8.42347
chr2L	6990000	7000000	0.607729	2.37e-17	13.2139	-0.741118	8.13e-09	6.97633	0.0441801	0.0946213	-0.727682	0.242908	2.31439
chr2L	7000000	7010000	-0.0147177	0.774531	12.4308	0.123281	0.255355	6.45031	0.0441801	0.0946213	-0.0772588	0.854451	7.00966
chr2L	7010000	7020000	-0.094195	0.0546595	12.4921	0.195862	0.0158547	6.24722	0.038428	0.167523	-0.45668	0.376137	5.85328
chr2L	7020000	7030000	-0.20064	5.55e-05	12.4555	0.162991	0.0725856	6.34367	0.0316423	0.278731	0.58902	0.185183	4.9812
chr2L	7030000	7040000	-0.0840901	0.152108	12.4286	0.1744	0.0522224	6.36406	0.0229623	0.278731	0.468049	0.278093	6.61134
chr2L	7040000	7050000	-0.0674777	0.204929	12.502	0.158992	0.13826	6.44437	0.0135714	0.278731	0.509535	0.233628	6.38586
chr2L	7050000	7060000	-0.132054	0.0778008	12.6283	0.36031	0.00295576	6.84151	-0.000111721	0.418481	0.737016	0.096061	5.58563
chr2L	7060000	7070000	0.0212901	0.703391	12.338	-0.0434552	0.632431	5.76535	0.00328039	0.284127	1.58725	0.008217	6.25521
chr2L	7070000	7080000	-0.0520504	0.340623	12.4292	0.0859418	0.350363	5.86877	0.00328039	0.284127	0.594815	0.282448	5.11828
chr2L	7080000	7090000	0.103522	0.0580553	12.3441	0.11037	0.20602	5.89795	-0.00353872	0.418481	0.594815	0.282448	5.11828
chr2L	7090000	7100000	-0.0262787	0.611893	12.4257	0.0808558	0.35109	5.85558	-0.00710078	0.539892	0.544722	0.339803	2.6176
chr2L	7100000	7110000	-0.0373277	0.481983	12.4438	0.105156	0.230459	5.86077	-0.00710078	0.563941	0.544722	0.339803	2.6176
chr2L	7110000	7120000	-0.065849	0.185079	12.457	0.0855009	0.324667	5.70273	-0.000236724	0.376029	-0.491239	0.632483	-2.04626
chr2L	7120000	7130000	-0.0506364	0.375265	12.3384	-0.16035	0.364665	5.38075	0.00769341	0.213628	0.179001	0.718697	3.44984
chr2L	7130000	7140000	-0.0495933	0.347387	12.4348	0.154993	0.0717732	5.91811	0.0216787	0.213628	0.179001	0.718697	3.44984
chr2L	7140000	7150000	-0.00337151	0.953087	12.4857	0.137631	0.092089	6.02423	0.0332894	0.213628	-0.50408	0.520076	-0.999564
chr2L	7150000	7160000	-0.0100168	0.863791	12.3343	0.141334	0.100959	5.89918	0.0344643	0.169985	0.300575	0.576854	2.71525
chr2L	7160000	7170000	-0.0293388	0.578605	12.4038	0.0122567	0.907063	5.571	0.0344643	0.169985	0	-1	0
chr2L	7170000	7180000	-0.0402415	0.533825	12.3283	-0.0942113	0.280647	5.75168	0.0228536	0.307129	0.519463	0.835121	-3.82219
chr2L	7180000	7190000	-0.0897452	0.0639171	12.4623	0.274482	0.0211988	6.72114	0.0295384	0.220528	0.783953	0.111398	3.91016
chr2L	7190000	7200000	-0.0017562	0.983716	12.4159	0.0763326	0.354755	6.01671	0.0379491	0.134201	1.34644	0.016837	5.62705
chr2L	7200000	7210000	0.0537089	0.266473	12.5237	0.0646079	0.456992	5.91528	0.0379491	0.134201	1.34644	0.016837	5.62705
chr2L	7210000	7220000	-0.0735757	0.117421	12.4927	-0.124708	0.192348	5.6412	0.0295384	0.220528	0.775704	0.146519	5.09452
chr2L	7220000	7230000	-0.00459492	0.93492	12.4925	-0.00666833	0.94479	5.86678	0.0242987	0.338571	-5.02645	0.000355	-1.19664
chr2L	7230000	7240000	-0.0527969	0.406632	12.3731	-0.0913996	0.426529	5.47711	0.019998	0.425172	-2.1263	0.024445	0.946768
chr2L	7240000	7250000	0.116416	0.0557031	12.4408	-0.034855	0.74606	5.51048	0.0166018	0.487927	-1.87364	0.025956	0.441336
chr2L	7250000	7260000	-0.0140189	0.79358	12.4147	0.0375291	0.674955	5.76694	0.00822249	0.525668	1.42479	0.052531	2.2618
chr2L	7260000	7270000	-0.128485	0.0139013	12.4108	0.0795466	0.356357	5.85575	0.00822249	0.525668	0	-1	0
chr2L	7270000	7280000	-0.063602	0.216044	12.5431	0.174948	0.0334125	6.01326	0.00822249	0.670312	1.08532	0.085552	2.50642
chr2L	7280000	7290000	-0.0374726	0.458769	12.441	0.0854638	0.313916	5.93564	-6.04e-05	0.670312	1.64917	0.317156	-3.56305
chr2L	7290000	7300000	-0.151304	0.00243489	12.5276	0.171109	0.108809	6.44694	-0.0015794	0.670312	0	-1	0
chr2L	7300000	7310000	-0.12124	0.0215751	12.5284	0.234454	0.00484854	6.29994	-0.0015794	0.826285	0.757777	0.109285	6.6428
chr2L	7310000	7320000	-0.154279	0.00545556	12.5846	0.40988	0.000410192	6.66798	-0.0015794	0.858602	0.757777	0.109285	6.6428
chr2L	7320000	7330000	-0.0128664	0.820066	12.4011	0.363074	0.00467443	6.88924	-0.00360278	0.876261	-0.108481	1	-3.13981
chr2L	7330000	7340000	-0.103535	0.0863351	12.4529	0.249483	0.0247345	6.49466	-0.00478305	0.858602	-1.45105	0.22597	-3.16754
chr2L	7340000	7350000	0.225797	0.000246245	12.3007	-1.10204	1.78e-31	6.13404	-0.00597152	0.826285	0.446217	0.36703	3.55038
chr2L	7350000	7360000	-0.0798224	0.163063	12.522	0.210777	0.085676	6.78242	-0.00694661	0.797925	2.59992	0.220377	-3.58413
chr2L	7360000	7370000	-0.0943189	0.0568092	12.4363	0.131853	0.0997551	6.22298	-0.00694661	0.797925	0.724917	0.393198	-2.05083
chr2L	7370000	7380000	-0.139491	0.037419	12.6172	0.345697	0.00303463	6.66813	-0.00993288	0.722121	-3.51631	0.231471	-4.38762
chr2L	7380000	7390000	-0.0753363	0.104798	12.4902	0.116789	0.137118	6.21038	-0.00640204	0.772324	0.523976	0.224398	4.92439
chr2L	7390000	7400000	-0.0805285	0.0906388	12.5079	0.0972977	0.260924	5.93854	-0.00219812	0.826404	0.654194	0.413774	-0.763651
chr2L	7400000	7410000	0.0122854	0.817213	12.5223	0.0126453	0.890403	5.75171	-0.00640204	0.772324	-1.38611	0.026605	4.0642
chr2L	7410000	7420000	0.301858	1.52e-05	12.7114	0.214155	0.0511921	6.47739	-0.00993288	0.722121	0.509894	0.244871	4.94164
chr2L	7420000	7430000	-0.0776658	0.271097	12.7744	0.283891	0.0222864	7.05158	-0.0175702	0.526991	1.09132	0.028309	6.02095
chr2L	7430000	7440000	-0.00535318	0.949937	12.2807	-0.127118	0.290454	5.49009	-0.0183876	0.50192	-1.21618	0.148467	2.72057
chr2L	7440000	7450000	0.0315136	0.626903	12.398	-0.0432082	0.664174	5.62074	-0.0121176	0.50192	-1.92034	0.080218	1.77067
chr2L	7450000	7460000	0.000874926	0.992348	12.3179	-0.136176	0.224434	5.48922	-0.00557091	0.670619	-1.92034	0.080218	1.77067
chr2L	7460000	7470000	-0.0104399	0.864863	12.4317	0.092045	0.252756	6.0415	-0.0121176	0.523582	-1.85439	0.093579	-2.96004
chr2L	7470000	7480000	-0.0330575	0.557127	12.4858	-0.00348066	0.97513	5.79608	-0.0176286	0.379955	0.947528	0.043514	4.11493
chr2L	7480000	7490000	-0.0018452	0.982582	12.5255	0.00284383	0.977983	5.80589	-0.0232953	0.334943	0.46933	0.269515	5.83668
chr2L	7490000	7500000	-0.0522109	0.400713	12.4493	0.0205078	0.826882	6.00618	-0.0254798	0.292267	0.46933	0.269515	5.83668
chr2L	7500000	7510000	-0.170404	0.00148211	12.5633	0.0979605	0.270195	5.86615	-0.0288014	0.244134	0.316798	0.497348	5.51714
chr2L	7510000	7520000	-0.118341	0.0263529	12.5822	-0.0576357	0.529067	5.8529	-0.0288014	0.244134	0.316798	0.497348	5.51714
chr2L	7520000	7530000	0.0270945	0.656573	12.4169	0.16174	0.0558796	5.96727	-0.0390797	0.154004	0.48038	0.283211	5.97788
chr2L	7530000	7540000	-0.046198	0.368025	12.5563	0.0640294	0.43763	6.088	-0.0517172	0.0698858	0.48038	0.283211	5.97788
chr2L	7540000	7550000	-0.0199723	0.737993	12.3478	0.00673587	0.938758	5.76392	-0.0572228	0.0455639	0.715118	0.167019	3.07923
chr2L	7550000	7560000	0.0397271	0.468129	12.318	0.0140488	0.881004	5.71309	-0.0572228	0.0455639	0.715118	0.167019	3.07923
chr2L	7560000	7570000	-0.0438988	0.437343	12.4002	-0.0871892	0.347154	5.66329	-0.0572228	0.0455639	0.48038	0.283211	5.97788
chr2L	7570000	7580000	-0.011697	0.862186	12.2814	0.25776	0.0308613	6.69233	-0.0572228	0.0455639	0.48038	0.283211	5.97788
chr2L	7580000	7590000	0.0694353	0.274245	12.2369	-0.177071	0.142854	5.47977	-0.0517172	0.0698858	0.90815	1	-4.48049
chr2L	7590000	7600000	0.158089	0.00235609	12.3714	0.00248172	0.97903	5.77384	-0.0419748	0.127102	0	-1	0
chr2L	7600000	7610000	0.12528	0.0174149	12.3875	-0.00503954	0.957723	5.9898	-0.024318	0.148862	-2.69478	0.173685	-3.96258
chr2L	7610000	7620000	0.0251508	0.591813	12.5172	0.150152	0.0625639	6.16508	-0.00215567	0.16852	-0.452949	0.349912	3.23852
chr2L	7620000	7630000	0.0712199	0.187258	12.4357	0.137619	0.0924627	6.00908	0.011277	0.234528	0	-1	0
chr2L	7630000	7640000	-0.00504821	0.938824	12.3084	-0.0807188	0.680085	5.36207	0.0170099	0.275605	1.28607	0.5534	-4.12617
chr2L	7640000	7650000	0.240244	6.77e-07	12.5401	0.0520442	0.575925	5.72384	0.0221374	0.275605	-2.51524	0.012039	-0.287413
chr2L	7650000	7660000	0.111245	0.038853	12.4033	0.170032	0.0741442	5.59175	0.0270387	0.275605	-2.51524	0.012039	-0.287413
chr2L	7660000	7670000	-0.0495701	0.353384	12.4133	0.0153174	0.88658	5.513	0.0306626	0.251486	-2.51524	0.012039	-0.287413
chr2L	7670000	7680000	0.141278	0.0108535	12.3156	0.0484278	0.755946	5.39809	0.0306626	0.251486	-6.19025	0.004315	-3.06884
chr2L	7680000	7690000	-0.0634215	0.222819	12.5045	0.0813662	0.347752	5.94745	0.0306626	0.251486	-2.46006	0.018973	-1.54424
chr2L	7690000	7700000	0.0346088	0.496596	12.471	0.0317074	0.730297	5.7396	0.0252269	0.356854	-2.41639	0.022641	-0.329642
chr2L	7700000	7710000	-0.0148252	0.761224	12.4966	0.163913	0.0597547	6.33184	0.0252269	0.356854	-0.760939	0.236837	2.76795
chr2L	7710000	7720000	-0.014492	0.803362	12.3728	-0.0315534	0.822629	5.43109	0.0308229	0.251486	-2.52125	0.034295	0.552369
chr2L	7720000	7730000	0.194027	0.0175044	12.213	-0.173238	0.581914	5.14546	0.0332542	0.238094	-2.52125	0.034295	0.552369
chr2L	7730000	7740000	0.0199058	0.812539	11.2568	0.119379	0.706784	4.65605	0.0332542	0.238094	-0.498259	0.607576	2.24636
chr2L	7740000	7750000	0.0283199	0.650449	12.3278	0.0997012	0.288745	5.64206	0.0333226	0.255884	1.6387	0.506088	-4.30711
chr2L	7750000	7760000	0.0237911	0.642112	12.409	0.150781	0.0804208	5.83144	0.0287429	0.33671	-5.04211	0.002972	-1.84381
chr2L	7760000	7770000	0.0284066	0.593776	12.3654	0.0502657	0.650662	5.49607	0.0244879	0.388674	-0.948322	0.342489	-1.96711
chr2L	7770000	7780000	0.0380239	0.548045	12.4076	0.199979	0.0214665	5.74924	0.0285071	0.342109	-2.96233	0.014077	-1.14713
chr2L	7780000	7790000	-0.0479212	0.357199	12.4658	0.185757	0.0277753	6.05855	0.0330868	0.290145	-1.96087	0.111734	-0.378809
chr2L	7790000	7800000	-0.182766	0.00168898	12.5397	0.159174	0.0563343	6.12526	0.0330868	0.290145	0.499525	0.260268	4.47082
chr2L	7800000	7810000	-0.0477279	0.36818	12.4982	0.111504	0.175984	6.0897	0.0293222	0.342109	0.531894	0.228804	5.00774
chr2L	7810000	7820000	-0.0488849	0.308612	12.5085	0.0929973	0.253046	6.09401	0.0255464	0.388674	0.531894	0.228804	5.00774
chr2L	7820000	7830000	-0.0481771	0.323903	12.5141	0.209787	0.0769861	6.72079	0.0244879	0.417774	1.32975	0.020801	8.19385
chr2L	7830000	7840000	-0.0656053	0.292669	12.3809	0.0994552	0.280071	5.7974	0.025303	0.413913	1.32975	0.020801	8.19385
chr2L	7840000	7850000	-0.0554682	0.292878	12.4363	0.0787267	0.373827	5.71834	0.025303	0.432739	-1.15748	0.208141	-0.119584
chr2L	7850000	7860000	0.0290117	0.576441	12.4263	0.0770915	0.366613	5.69813	0.0272066	0.403639	-1.15748	0.208141	-0.119584
chr2L	7860000	7870000	-0.0328159	0.576429	12.3706	0.0298013	0.717937	6.23192	0.0301446	0.395743	-2.46292	0.033149	-1.2945
chr2L	7870000	7880000	-0.0753666	0.132199	12.4592	0.148502	0.180916	6.49654	0.0301446	0.395743	-2.46292	0.033149	-1.2945
chr2L	7880000	7890000	-0.0514859	0.334862	12.4048	0.0840399	0.43236	6.44557	0.0301446	0.395743	0.702137	0.16129	3.45778
chr2L	7890000	7900000	-0.111513	0.0184948	12.4837	0.231951	0.0105959	6.36236	0.0329848	0.366138	0.574325	0.451722	-1.87822
chr2L	7900000	7910000	-0.140874	0.0156591	12.4439	0.303352	0.0149853	6.85694	0.0355749	0.30402	0.142895	0.732822	7.56018
chr2L	7910000	7920000	-0.0966057	0.11008	12.4238	0.356573	0.00425352	6.91233	0.0383554	0.228529	0.142895	0.732822	7.56018
chr2L	7920000	7930000	-0.105274	0.0301069	12.4912	0.202563	0.0148232	5.98067	0.0421389	0.184157	0.142895	0.732822	7.56018
chr2L	7930000	7940000	-0.137981	0.00441087	12.5036	0.126403	0.157637	5.76292	0.0458189	0.153548	0.142895	0.732822	7.56018
chr2L	7940000	7950000	-0.124197	0.0320111	12.4149	0.148936	0.0838382	5.85088	0.0470533	0.152074	0.142895	0.732822	7.56018
chr2L	7950000	7960000	0.000271532	1	12.4061	0.0585162	0.498248	6.13172	0.0458189	0.154568	-1.23627	0.010142	3.37821
chr2L	7960000	7970000	-0.121086	0.0187988	12.3956	0.0704384	0.39279	6.0025	0.0458189	0.154568	-1.23627	0.010142	3.37821
chr2L	7970000	7980000	-0.0700392	0.298346	12.3052	0.0705933	0.542613	6.58979	0.0458189	0.154568	-0.797768	0.07231	5.65172
chr2L	7980000	7990000	0.0328912	0.661398	12.2444	-0.350136	4.34e-05	6.01951	0.0427911	0.184157	-0.797768	0.07231	5.65172
chr2L	7990000	8000000	-0.0601255	0.224269	12.469	0.193161	0.0159663	6.26496	0.0381733	0.260656	-2.24386	0.034032	-0.0513226
chr2L	8000000	8010000	-0.0379693	0.480176	12.3878	0.232121	0.0373291	6.56344	0.0340615	0.375468	-2.17566	0.076501	-3.04399
chr2L	8010000	8020000	0.554632	1.26e-10	12.2971	-1.12086	2.17e-36	6.13499	0.0283594	0.44355	-1.42822	0.014636	6.3915
chr2L	8020000	8030000	0.258973	0.000175806	12.6075	-0.253499	0.00567057	6.33021	0.020516	0.59514	-1.14564	0.019296	11.1338
chr2L	8030000	8040000	-0.16306	0.00636682	12.5102	0.174934	0.0306038	6.14768	0.0109489	0.782919	2.82143	0.001776	4.02602
chr2L	8040000	8050000	-0.158347	0.00624744	12.5626	0.182719	0.0824449	6.39887	0.00638471	0.822404	1.08605	0.044003	7.01015
chr2L	8050000	8060000	-0.124829	0.026926	12.5608	0.247547	0.00270166	6.12185	0.000913665	0.822404	0.192502	0.645698	6.50046
chr2L	8060000	8070000	-0.123992	0.0685528	12.631	0.144911	0.104257	6.1054	-0.00405356	0.822404	0.116581	0.779248	8.70774
chr2L	8070000	8080000	-0.020282	0.670123	12.4959	0.154178	0.0562874	6.28216	-0.00658652	0.822404	0.550734	0.297984	2.37009
chr2L	8080000	8090000	-0.0913139	0.0511536	12.5056	0.280317	0.0130669	6.59642	-0.0076599	0.822404	1.91369	0.006941	4.93746
chr2L	8090000	8100000	-0.0802986	0.147855	12.3996	-0.0743327	0.483769	5.61491	-0.00824658	0.803615	1.91369	0.006941	4.93746
chr2L	8100000	8110000	-0.0962906	0.0530086	12.4919	0.011055	0.906043	5.65086	-0.00883501	0.781413	0.902403	0.079997	6.70135
chr2L	8110000	8120000	0.0701975	0.269705	12.2535	-0.194794	0.0613869	5.53993	-0.0103831	0.7473	0.902403	0.079997	6.70135
chr2L	8120000	8130000	-0.102476	0.0884533	12.589	0.17061	0.062046	6.37852	-0.0158534	0.619686	1.34504	0.037402	3.08221
chr2L	8130000	8140000	-0.105749	0.128843	12.6145	0.161169	0.0498498	6.21127	-0.021934	0.482034	0.779414	0.103927	5.47361
chr2L	8140000	8150000	0.0489237	0.372822	12.5634	0.221722	0.00697288	6.26932	-0.0257728	0.434603	0.383842	0.381397	5.41993
chr2L	8150000	8160000	-0.140326	0.00447165	12.5059	0.0896583	0.27956	6.06733	-0.0280069	0.404381	1.659	0.004051	5.60182
chr2L	8160000	8170000	0.0504575	0.315213	12.41	-0.112199	0.207318	5.90255	-0.0323579	0.330159	2.32362	0.000546	5.16862
chr2L	8170000	8180000	-0.100452	0.0298541	12.532	0.104701	0.232478	5.86737	-0.0381385	0.259802	-0.411001	0.327309	6.22006
chr2L	8180000	8190000	-0.00865909	0.876756	12.3701	0.110901	0.217415	5.72539	-0.0405294	0.206713	-0.411001	0.327309	6.22006
chr2L	8190000	8200000	-0.115699	0.0248149	12.5326	0.0964779	0.230788	6.1372	-0.0466401	0.126519	-0.411001	0.327309	6.22006
chr2L	8200000	8210000	-0.0875053	0.0721594	12.5349	0.0330808	0.698325	6.02108	-0.0466401	0.106219	1.36156	0.033482	3.06133
chr2L	8210000	8220000	-0.0958603	0.0742443	12.5407	0.169628	0.115123	6.46333	-0.0466401	0.106219	1.1126	0.034377	7.14126
chr2L	8220000	8230000	-0.0553102	0.252908	12.4912	0.152851	0.0764726	5.96573	-0.0466401	0.106219	0.534536	0.224865	5.24493
chr2L	8230000	8240000	-0.0400989	0.456746	12.3601	-0.0520253	0.579977	5.87657	-0.046009	0.106219	0.350896	0.422076	6.20393
chr2L	8240000	8250000	-0.0594994	0.217354	12.517	0.163738	0.0487464	5.99052	-0.0379594	0.151346	-1.82652	0.017626	1.30708
chr2L	8250000	8260000	-0.0370136	0.457488	12.4639	0.0569662	0.516507	6.00664	-0.0357412	0.199683	-1.82652	0.017626	1.30708
chr2L	8260000	8270000	-0.000408925	1	12.3353	-0.0233103	0.792906	5.93521	-0.0228915	0.458227	0.525261	0.237186	7.20142
chr2L	8270000	8280000	-0.0130055	0.818695	12.3489	0.167991	0.147906	6.64708	-0.0100009	0.472144	0.525261	0.237186	7.20142
chr2L	8280000	8290000	-0.0796115	0.119827	12.3955	0.213581	0.0231821	6.37874	-0.00050325	0.472144	-0.202419	0.711437	2.78067
chr2L	8290000	8300000	-0.0612064	0.24668	12.4641	0.178915	0.117679	6.62924	0.00585205	0.472144	-0.14192	0.831103	1.23637
chr2L	8300000	8310000	-0.0745053	0.146155	12.5215	0.155875	0.149748	6.43328	0.0076924	0.472144	-1.55498	0.123429	-0.937277
chr2L	8310000	8320000	0.00246015	0.96744	12.5517	0.088769	0.284487	6.09343	0.0163335	0.498476	-2.227	0.000866	1.93848
chr2L	8320000	8330000	0.00519143	0.938175	12.2915	0.0757079	0.36059	6.04384	0.0163335	0.329766	-1.69835	0.027376	1.15468
chr2L	8330000	8340000	-0.0899539	0.0940731	12.3641	7.24e-05	0.995898	5.38728	0.0163335	0.329766	-2.25334	0.062775	-2.44776
chr2L	8340000	8350000	0.0405473	0.431782	12.4325	0.0355807	0.717336	5.61705	0.0163335	0.318645	-2.25334	0.062775	-2.44776
chr2L	8350000	8360000	0.0326479	0.562816	12.3787	0.0310167	0.722232	5.75842	0.0163335	0.318645	-0.749135	0.407492	2.35355
chr2L	8360000	8370000	0.0595597	0.216554	12.4809	0.0257214	0.808252	6.39342	0.00930332	0.303434	0.737898	0.11462	3.81699
chr2L	8370000	8380000	-0.157853	0.00551764	12.5794	0.117187	0.207992	6.37233	-0.00858565	0.298633	0.471056	0.286491	6.71423
chr2L	8380000	8390000	-0.0533366	0.321322	12.5797	0.0756631	0.336991	6.27797	-0.0179351	0.298633	-1.29061	0.110651	1.04159
chr2L	8390000	8400000	-0.0579105	0.224097	12.5396	0.144893	0.108459	5.89556	-0.0241129	0.298633	-1.91913	0.1521	1.66655
chr2L	8400000	8410000	-0.0581382	0.300722	12.565	0.10359	0.206375	6.30915	-0.0245594	0.298633	0.7219	0.102871	7.51236
chr2L	8410000	8420000	-0.140115	0.0616007	12.6372	0.316902	0.0099478	6.97015	-0.0358998	0.178963	1.33794	0.018177	5.07793
chr2L	8420000	8430000	-0.150047	0.00800411	12.5832	0.0894793	0.323517	6.18461	-0.0475356	0.0823441	0.893798	0.067823	8.76306
chr2L	8430000	8440000	-0.169164	0.000433916	12.5395	0.201789	0.0571575	6.40426	-0.0538581	0.0592753	0.893798	0.067823	8.76306
chr2L	8440000	8450000	-0.0483229	0.375124	12.5405	0.0488948	0.579053	5.70671	-0.0538581	0.0592753	0.821567	0.072707	4.76803
chr2L	8450000	8460000	0.348279	0.000144387	12.2982	-1.62874	1.83e-60	6.00666	-0.0538581	0.0592753	0.438125	0.370181	3.59852
chr2L	8460000	8470000	0.0189687	0.716169	12.4797	0.0430202	0.70632	6.60825	-0.0538581	0.0592753	-0.363993	0.535125	2.23386
chr2L	8470000	8480000	-0.0986686	0.0827929	12.5088	0.331642	0.00775236	6.97689	-0.0538581	0.070249	0.207401	0.653605	3.78453
chr2L	8480000	8490000	-0.11586	0.115388	12.6233	0.108013	0.236935	6.37735	-0.048233	0.114663	0.512974	0.378912	1.80574
chr2L	8490000	8500000	-0.0561298	0.302366	12.4868	0.0641666	0.482953	5.73019	-0.0438404	0.146078	-3.31881	0.001377	0.827176
chr2L	8500000	8510000	0.0325879	0.571856	12.4206	-0.112573	0.544243	5.37224	-0.0373993	0.201615	1.29702	0.03047	3.50841
chr2L	8510000	8520000	-0.0909844	0.166179	12.6041	0.157618	0.146146	6.45982	-0.0247655	0.236264	1.10645	0.039439	4.93119
chr2L	8520000	8530000	-0.00445471	0.937895	12.5623	0.242617	0.0069195	6.37485	-0.00457607	0.236264	1.1022	0.015535	5.13057
chr2L	8530000	8540000	0.0430002	0.553139	12.2889	0.0282616	0.739717	6.20436	0.0053531	0.236264	1.1022	0.015535	5.13057
chr2L	8540000	8550000	0.0237045	0.702704	12.3927	0.0540157	0.529613	6.09192	0.0120557	0.287418	1.1022	0.015535	5.13057
chr2L	8550000	8560000	-0.0870048	0.075402	12.4657	0.173151	0.0562766	5.88456	0.0221844	0.287418	0.951506	0.06625	5.20923
chr2L	8560000	8570000	-0.0211647	0.682558	12.4254	-0.0181587	0.867353	5.56044	0.0261502	0.316625	0.951506	0.06625	5.20923
chr2L	8570000	8580000	-0.0405099	0.443779	12.5417	0.182547	0.0295427	6.32042	0.0261502	0.316625	0	-1	0
chr2L	8580000	8590000	0.0063246	0.918059	12.3477	-0.0515789	0.617911	5.53885	0.0261502	0.265471	0.177546	0.753912	2.07341
chr2L	8590000	8600000	0.238459	0.0271698	11.9747	-1.57318	6.53e-11	5.3106	0.0261502	0.265471	-0.76121	0.084146	5.55132
chr2L	8600000	8610000	-0.0352646	0.523401	12.358	-0.125989	0.15203	5.82991	0.0261502	0.223108	-0.76121	0.084146	5.55132
chr2L	8610000	8620000	-0.0639806	0.226503	12.3649	0.0703909	0.449723	5.64607	0.0196431	0.225653	0.581956	0.208973	6.04922
chr2L	8620000	8630000	-0.0591841	0.237251	12.4336	0.105356	0.221282	5.72334	-0.00403788	0.228853	0.581956	0.208973	6.04922
chr2L	8630000	8640000	0.00605916	0.909205	12.4394	-0.025981	0.827728	5.47479	-0.0272814	0.250757	0.581956	0.208973	6.04922
chr2L	8640000	8650000	-0.0436908	0.408624	12.4617	-0.0337419	0.871622	5.35376	-0.0272814	0.250757	0.581956	0.208973	6.04922
chr2L	8650000	8660000	-0.0379704	0.458969	12.447	0.0877385	0.303097	5.78455	-0.0272814	0.288238	0.581956	0.208973	6.04922
chr2L	8660000	8670000	0.170659	0.0185002	12.3307	-0.13648	0.49009	5.36025	-0.0272814	0.343855	0.581956	0.208973	6.04922
chr2L	8670000	8680000	0.109044	0.114193	12.64	0.130953	0.127117	5.92884	-0.0272814	0.343855	-2.43717	0.001235	3.88156
chr2L	8680000	8690000	-0.190817	6.96e-05	12.532	0.154566	0.0559254	6.28099	-0.0169393	0.539451	0.627435	0.146535	4.78013
chr2L	8690000	8700000	0.0223597	0.657283	12.4253	0.151444	0.0818362	5.96412	-0.0100023	0.652291	0.627435	0.146535	4.78013
chr2L	8700000	8710000	-0.0256981	0.615473	12.4267	0.137774	0.103788	6.16068	-0.00752264	0.689502	2.07954	0.002807	3.49015
chr2L	8710000	8720000	-0.00658117	0.903421	12.4245	0.170352	0.04972	5.95022	-0.00716474	0.748169	0.656606	0.143916	6.51322
chr2L	8720000	8730000	0.0783371	0.439212	10.7536	-0.161838	0.658449	3.98583	-0.00401827	0.781831	0.656606	0.143916	6.51322
chr2L	8730000	8740000	0.0497141	0.47611	12.0995	-0.0653941	0.555566	5.49506	0.00065294	0.800714	1.27884	0.062723	0.895773
chr2L	8740000	8750000	-0.034017	0.557722	12.3183	-0.0678701	0.447601	5.6777	0.00173733	0.800714	0.656606	0.143916	6.51322
chr2L	8750000	8760000	-0.0393231	0.486142	12.4307	0.0317953	0.746389	5.61423	0.00173733	0.781831	0.918655	0.563227	-3.54435
chr2L	8760000	8770000	-0.0286064	0.623511	12.377	0.0814229	0.352457	5.78217	-8.05e-05	0.748169	-4.49078	0.002228	-0.534797
chr2L	8770000	8780000	-0.0490743	0.369271	12.3671	0.202676	0.0129533	6.01472	-8.05e-05	0.748169	-4.18943	9.3e-05	1.46088
chr2L	8780000	8790000	-0.095127	0.113524	12.4021	0.214321	0.012373	5.71948	-0.00401827	0.67962	-2.81956	0.009847	0.981071
chr2L	8790000	8800000	-0.0939698	0.0979236	12.3403	0.153022	0.0760451	5.7702	-0.00811881	0.738878	0	-1	0
chr2L	8800000	8810000	-0.132851	0.0160844	12.3345	0.109651	0.204077	5.70264	-0.00811881	0.77254	0	-1	0
chr2L	8810000	8820000	-0.0673621	0.178984	12.4198	0.194835	0.0285266	5.80402	-0.0054114	0.670609	0	-1	0
chr2L	8820000	8830000	-0.0853597	0.101459	12.3826	0.308001	0.000142064	6.22209	-0.0054114	0.544194	-1.45614	0.055017	1.5475
chr2L	8830000	8840000	-0.0560863	0.333487	12.3593	0.233752	0.00675404	5.80052	-0.0054114	0.47122	0	-1	0
chr2L	8840000	8850000	-0.0954965	0.0929239	12.3668	0.23005	0.00416997	6.06617	-0.0054114	0.441422	0	-1	0
chr2L	8850000	8860000	-0.166903	0.000721407	12.4349	0.260866	0.00179253	6.17782	0.00921097	0.402605	1.83874	1	-4.69664
chr2L	8860000	8870000	-0.156516	0.00203021	12.4193	0.261275	0.00149784	6.00299	0.0203584	0.402605	-3.16734	0.34698	-4.47538
chr2L	8870000	8880000	-0.114867	0.0360952	12.4151	0.14531	0.109079	5.81932	0.0212805	0.402605	0	-1	0
chr2L	8880000	8890000	0.0749436	0.176691	12.334	0.166142	0.0594582	5.91334	0.0234162	0.370466	-1.11546	0.703509	-4.37855
chr2L	8890000	8900000	0.0179755	0.753333	12.3496	0.109901	0.173555	6.23288	0.0234162	0.370466	-1.45492	0.633215	-3.94925
chr2L	8900000	8910000	-0.0303198	0.584847	12.3511	0.0430259	0.604896	6.09903	0.0234162	0.370466	0.193808	0.649028	7.02215
chr2L	8910000	8920000	-0.0560893	0.24922	12.4396	0.089469	0.267542	6.13014	0.0229737	0.402192	0.193808	0.649028	7.02215
chr2L	8920000	8930000	0.0216466	0.687153	12.5639	0.262339	0.0154064	6.43197	0.0203584	0.402192	0.193808	0.649028	7.02215
chr2L	8930000	8940000	-0.0501083	0.354089	12.4265	-0.0774011	0.402379	5.66218	0.0197547	0.402192	-1.74086	0.057353	2.59252
chr2L	8940000	8950000	0.0377633	0.488492	12.4064	-0.00362241	0.972665	5.77693	0.0023692	0.313171	-1.74086	0.057353	2.59252
chr2L	8950000	8960000	0.0898316	0.20406	12.2573	-0.352653	0.00341169	5.52894	-0.0165892	0.233848	1.41554	0.194965	1.32366
chr2L	8960000	8970000	0.0741634	0.212465	12.3294	-0.135871	0.27037	5.46706	-0.0199018	0.272915	2.97331	0.019224	-1.04286
chr2L	8970000	8980000	-0.0697661	0.199034	12.3447	-0.0649608	0.518187	5.56727	-0.0206189	0.332371	2.97331	0.019224	-1.04286
chr2L	8980000	8990000	0.146822	0.0583897	12.3218	-0.00647974	0.943864	6.0782	-0.0235048	0.332371	1.22318	0.030162	2.67397
chr2L	8990000	9000000	-0.0706438	0.141929	12.5157	0.00357787	0.967366	5.86442	-0.0235048	0.332371	1.37948	0.042181	1.27506
chr2L	9000000	9010000	0.43197	5.52e-06	12.2573	-1.65671	1.39e-56	6.0333	-0.0235048	0.272915	0.476696	0.328525	3.73178
chr2L	9010000	9020000	0.0882664	0.118242	12.3932	-0.107959	0.209094	5.73746	-0.0235048	0.272915	-6.57615	0	2.66121
chr2L	9020000	9030000	-0.048401	0.346773	12.4506	0.044317	0.644066	5.60423	-0.0206189	0.332371	0.47365	0.850919	-3.82048
chr2L	9030000	9040000	-0.0206983	0.680237	12.4337	-0.042212	0.719757	5.5058	-0.02051	0.332371	0.47365	0.850919	-3.82048
chr2L	9040000	9050000	0.00509081	0.92618	12.4245	-0.230044	0.309641	5.32079	-0.00770568	0.377613	0	-1	0
chr2L	9050000	9060000	0.050644	0.503052	12.2052	-0.0773079	0.396544	5.64985	0.00549989	0.377613	-3.78225	0.00677	-2.78475
chr2L	9060000	9070000	0.118439	0.049053	12.313	-0.097337	0.516321	5.40994	0.00783577	0.383595	-3.78225	0.00677	-2.78475
chr2L	9070000	9080000	0.0175959	0.797085	12.274	0.0498471	0.605337	5.61198	0.00793028	0.406526	-1.79392	0.041526	-1.70709
chr2L	9080000	9090000	0.137456	0.0365807	12.241	-0.203511	0.127599	5.45245	0.0148148	0.406526	-0.0946001	1	-4.12575
chr2L	9090000	9100000	0.05378	0.365159	12.3862	-0.128928	0.422979	5.3971	0.0201338	0.398886	-0.943308	1	-4.74206
chr2L	9100000	9110000	-0.0113119	0.854308	12.4015	-0.0476392	0.826747	5.33401	0.0148148	0.579585	0	-1	0
chr2L	9110000	9120000	0.00483528	0.931323	12.3875	-0.33703	0.266912	5.16668	0.0201308	0.423563	-3.13175	0.315183	-4.48225
chr2L	9120000	9130000	-0.0732847	0.176504	12.3622	-0.0169118	0.84095	6.29437	0.0148148	0.59253	2.67	0.554538	-4.58505
chr2L	9130000	9140000	-0.0541576	0.285985	12.4057	0.0726257	0.404845	6.06352	0.0131443	0.621426	-0.0203092	0.961995	6.78767
chr2L	9140000	9150000	-0.0827516	0.131401	12.4666	-0.168217	0.0759445	5.65003	0.0131443	0.621426	-0.0203092	0.961995	6.78767
chr2L	9150000	9160000	-0.0135988	0.810545	12.3619	-0.218313	0.0595995	5.48537	0.00439625	0.804863	-0.0203092	0.961995	6.78767
chr2L	9160000	9170000	-0.050875	0.367536	12.4499	0.129769	0.205329	6.39479	0.00240323	0.804863	1.31509	0.019292	3.85505
chr2L	9170000	9180000	-0.0539176	0.4011	12.203	0.0521441	0.535616	6.07855	0.000257852	0.773509	1.64512	0.066883	0.121631
chr2L	9180000	9190000	0.0224687	0.694786	12.3913	-0.0759879	0.393663	5.92188	-0.00457751	0.773509	0.456728	0.288972	8.18882
chr2L	9190000	9200000	-0.0116112	0.839825	12.401	-0.072324	0.515566	5.53277	-0.00457751	0.806587	0.456728	0.288972	8.18882
chr2L	9200000	9210000	-0.0475624	0.400921	12.4493	0.323979	0.00294875	6.42658	-0.00457751	0.773509	0.456728	0.288972	8.18882
chr2L	9210000	9220000	0.210224	8.79e-05	12.4572	-0.0480627	0.608415	6.34079	-0.00457751	0.773509	0.456728	0.288972	8.18882
chr2L	9220000	9230000	0.185296	0.000374834	12.3728	-0.100345	0.235498	6.31019	0.000257852	0.691731	0.456728	0.288972	8.18882
chr2L	9230000	9240000	-0.124992	0.0211219	12.4842	0.168038	0.0448866	6.02933	0.00224832	0.613246	0.456728	0.288972	8.18882
chr2L	9240000	9250000	-0.0799784	0.13279	12.4449	0.107726	0.29924	5.51505	0.0106115	0.521877	0.456728	0.288972	8.18882
chr2L	9250000	9260000	-0.138433	0.00314348	12.4732	0.173677	0.0397349	5.9044	0.0205094	0.429436	-3.4903	0.191777	-4.39403
chr2L	9260000	9270000	-0.00246125	0.971841	12.4556	-0.0735707	0.683111	5.38019	0.0269589	0.37693	-3.75553	0.167327	-4.3143
chr2L	9270000	9280000	-0.0674762	0.19709	12.4292	-0.00180436	0.993387	5.5024	0.0297148	0.323345	-3.02651	0.002612	1.91262
chr2L	9280000	9290000	-0.0159612	0.769569	12.3752	-0.123619	0.565415	5.33684	0.0354619	0.232157	-3.02651	0.002612	1.91262
chr2L	9290000	9300000	0.0868089	0.154627	12.2983	-0.266292	0.398559	5.08317	0.0453677	0.138642	-3.02651	0.002612	1.91262
chr2L	9300000	9310000	-0.0812057	0.107398	12.4143	0.00724759	0.951341	5.44283	0.0453677	0.138642	-3.02651	0.002612	1.91262
chr2L	9310000	9320000	-0.013456	0.833202	12.3707	0.0131793	0.901649	5.49581	0.0539782	0.0839778	0.100758	1	-4.57624
chr2L	9320000	9330000	-0.00479608	0.935883	12.4199	0.0265879	0.792605	5.58216	0.0561768	0.0683637	3.66311	0.199139	-4.36453
chr2L	9330000	9340000	-0.0210165	0.694221	12.4332	0.0316174	0.720079	5.70211	0.0561768	0.0683637	-1.81055	0.023222	1.51584
chr2L	9340000	9350000	0.0183188	0.767339	12.3486	-0.0347559	0.739372	5.52505	0.0561768	0.0683637	-1.81055	0.023222	1.51584
chr2L	9350000	9360000	-0.0291587	0.637689	12.3557	-0.121343	0.581585	5.3203	0.0561768	0.0683637	1.02954	0.623675	-3.4586
chr2L	9360000	9370000	-0.0929581	0.060311	12.4644	0.0240538	0.781928	5.68311	0.0529719	0.104929	1.13875	1	-4.34828
chr2L	9370000	9380000	0.0251245	0.625413	12.4501	-0.00545361	0.979227	5.4064	0.0432261	0.158094	-3.03831	0.014679	-2.31015
chr2L	9380000	9390000	0.0504427	0.307464	12.4142	-0.0608041	0.505142	5.82378	0.0341402	0.235369	-0.921162	0.172741	2.13286
chr2L	9390000	9400000	-0.0322367	0.662599	12.7042	0.0742257	0.38995	6.12646	0.0303789	0.294223	-1.71684	0.001379	3.53721
chr2L	9400000	9410000	0.0617229	0.260815	12.3786	-0.0377233	0.864114	5.3359	0.0230415	0.32993	-1.8233	0.113565	-2.677
chr2L	9410000	9420000	0.0467444	0.417624	12.4101	0.0589158	0.504158	5.69764	0.00898068	0.32993	-1.95327	0.018652	0.343501
chr2L	9420000	9430000	0.245665	5.01e-05	12.4102	0.0980971	0.228284	6.02109	-0.00424939	0.32993	-1.95327	0.018652	0.343501
chr2L	9430000	9440000	0.006569	0.925471	12.6485	0.250148	0.00201139	6.30298	-0.0142467	0.32993	2.83128	0.009641	-0.321197
chr2L	9440000	9450000	-0.0382515	0.526523	12.3084	0.0528395	0.510554	6.26369	-0.0247886	0.294223	0.560699	0.194166	6.91788
chr2L	9450000	9460000	0.0088006	0.88851	12.4159	0.107698	0.189948	6.25746	-0.0254416	0.334292	0.560699	0.194166	6.91788
chr2L	9460000	9470000	0.030119	0.542128	12.4423	0.043886	0.631587	5.81559	-0.0332488	0.215596	0.560699	0.194166	6.91788
chr2L	9470000	9480000	-0.0862508	0.242007	11.8042	-0.0440062	0.907364	4.72902	-0.0332488	0.215596	0.581733	0.832398	-3.92646
chr2L	9480000	9490000	0.0604434	0.459771	11.7345	-0.066282	0.850453	4.9288	-0.0376264	0.143997	0	-1	0
chr2L	9490000	9500000	-0.0524343	0.257675	12.4845	0.148811	0.173743	6.47602	-0.0376264	0.143997	0.894048	0.044577	7.36261
chr2L	9500000	9510000	0.0517841	0.325519	12.3551	0.159777	0.046339	6.04271	-0.0393231	0.143997	0.212382	0.618272	7.0317
chr2L	9510000	9520000	-0.0887477	0.0769476	12.5519	0.0869736	0.296748	6.03892	-0.0376264	0.149297	0.212382	0.618272	7.0317
chr2L	9520000	9530000	0.0366975	0.538603	12.2972	0.0131763	0.883767	6.0862	-0.0334369	0.191065	1.02086	0.0425	3.1026
chr2L	9530000	9540000	-0.101447	0.0630137	12.5421	0.0860771	0.317257	5.94038	-0.0334019	0.19409	0.834152	0.053262	5.6606
chr2L	9540000	9550000	-0.0355455	0.536266	12.3923	0.0791474	0.42253	5.53995	-0.0334019	0.19409	6.55119	0.000666	0.511975
chr2L	9550000	9560000	-0.25509	9.59e-07	12.5297	0.134547	0.170914	5.65056	-0.0362447	0.156762	-1.76587	0.013709	2.62503
chr2L	9560000	9570000	-0.069133	0.302787	12.6093	0.401836	0.000518494	6.59914	-0.0334019	0.19409	-1.76587	0.013709	2.62503
chr2L	9570000	9580000	-0.155058	0.0061679	12.5474	0.173558	0.0292527	6.27308	-0.0334019	0.19409	2.01819	0.016343	1.18418
chr2L	9580000	9590000	-0.0817642	0.113668	12.5232	0.303281	0.000178234	6.24509	-0.0302169	0.235452	-1.86776	0.152619	-2.5133
chr2L	9590000	9600000	-0.19333	0.000209255	12.5414	0.185749	0.0220096	6.01422	-0.0285437	0.259548	1.1537	0.009434	5.37083
chr2L	9600000	9610000	-0.0997008	0.0385436	12.5094	0.25437	0.00350327	6.33615	-0.0262647	0.276663	1.1537	0.009434	5.37083
chr2L	9610000	9620000	-0.0801547	0.0993115	12.4721	0.209708	0.0143313	6.15529	-0.0157669	0.245507	0.155125	0.709999	5.97513
chr2L	9620000	9630000	-0.0778929	0.152115	12.4515	0.0855019	0.353238	5.63267	0.00369576	0.219162	1.52705	0.206235	-3.41955
chr2L	9630000	9640000	-0.0162219	0.781372	12.4239	0.119449	0.211053	5.60895	0.0157628	0.219162	-1.56459	0.031455	3.57572
chr2L	9640000	9650000	-0.150731	0.00991135	12.5938	0.150622	0.0855464	6.1293	0.0265129	0.219162	-1.56459	0.031455	3.57572
chr2L	9650000	9660000	-0.143104	0.0322352	12.607	0.165179	0.0454208	6.01282	0.0361422	0.219162	-1.56459	0.031455	3.57572
chr2L	9660000	9670000	-0.0409289	0.524057	12.4608	0.0177153	0.843311	5.75817	0.0377308	0.193194	-1.70591	0.190531	-3.41727
chr2L	9670000	9680000	-0.109413	0.0367897	12.4043	0.0268848	0.789758	5.59067	0.0377308	0.193194	2.32163	0.151789	-3.74527
chr2L	9680000	9690000	-0.053348	0.393602	12.3576	-0.0050378	0.967178	5.58047	0.0377308	0.193194	0.78351	0.128504	6.49679
chr2L	9690000	9700000	-0.0303317	0.57034	12.4786	0.116979	0.166159	5.9368	0.0377308	0.193194	0.78351	0.128504	6.49679
chr2L	9700000	9710000	-0.0901202	0.0609828	12.5035	0.217865	0.0427396	6.43955	0.0377308	0.193194	1.07782	0.056451	3.81656
chr2L	9710000	9720000	0.119568	0.0683127	12.1941	-0.0205721	0.944637	5.27788	0.0165463	0.248924	-3.31975	0.001426	0.788336
chr2L	9720000	9730000	0.0999523	0.111488	12.3745	0.0474583	0.654098	5.53152	-0.00491679	0.248924	-3.10736	0.004076	0.120498
chr2L	9730000	9740000	-0.00160541	0.985885	12.4136	0.291925	0.000350852	6.13158	-0.00879126	0.248924	-5.05413	0.000513	-1.2109
chr2L	9740000	9750000	-0.0549307	0.253924	12.4545	0.188193	0.0341409	5.71218	-0.015719	0.248924	-4.38465	0.000248	0.294019
chr2L	9750000	9760000	-0.108546	0.0320657	12.432	0.299794	0.000407615	6.24931	-0.0158447	0.3825	-1.9405	0.158435	0.0273816
chr2L	9760000	9770000	-0.140888	0.0280077	12.5903	0.234388	0.00297124	6.27479	-0.0158447	0.593289	-1.35874	0.271943	2.37224
chr2L	9770000	9780000	-0.0194058	0.720321	12.5236	0.0776308	0.365067	5.88723	-0.0158447	0.567562	-1.35874	0.271943	2.37224
chr2L	9780000	9790000	-0.164608	0.0148355	12.6145	0.279544	0.0146658	6.6623	-0.0158447	0.567562	0.733786	0.087795	6.78224
chr2L	9790000	9800000	-0.066707	0.208953	12.4294	-0.055243	0.544382	5.95494	-0.0158447	0.567562	-1.84826	0.037233	1.38942
chr2L	9800000	9810000	0.127513	0.0476047	12.3415	-0.156854	0.38724	5.37189	-0.0175121	0.61001	-1.84826	0.037233	1.38942
chr2L	9810000	9820000	-0.0163695	0.757151	12.3894	0.126248	0.166263	5.85578	-0.0175121	0.61001	-1.84826	0.037233	1.38942
chr2L	9820000	9830000	-0.0439698	0.472244	12.4738	0.174155	0.0461293	5.75089	-0.0157325	0.622844	-1.84826	0.037233	1.38942
chr2L	9830000	9840000	-0.121434	0.0170104	12.4392	0.0794829	0.405881	5.60339	-0.0149405	0.6428	0	-1	0
chr2L	9840000	9850000	-0.0944327	0.0594723	12.4501	-0.0432505	0.730367	5.44772	-0.00632162	0.698792	-1.61929	0.412175	-3.94685
chr2L	9850000	9860000	-0.0909234	0.105309	12.3516	-0.0408553	0.787695	5.41004	-0.00924519	0.6428	0	-1	0
chr2L	9860000	9870000	-0.127328	0.0102763	12.4465	0.144843	0.121136	5.68242	-0.0186561	0.608357	-2.21348	0.021486	-0.177005
chr2L	9870000	9880000	-0.140065	0.0323177	12.49	0.0168039	0.871222	5.58781	-0.0212277	0.575568	-2.21348	0.021486	-0.177005
chr2L	9880000	9890000	-0.0447487	0.401097	12.4397	-0.0206215	0.824716	5.71917	-0.0245716	0.495904	-2.21348	0.021486	-0.177005
chr2L	9890000	9900000	0.0564066	0.408768	12.6433	0.00134364	0.986455	6.2613	-0.0262788	0.408662	2.07656	0.045224	-1.59227
chr2L	9900000	9910000	0.332477	2.7e-06	13.2823	-0.16323	0.143078	6.50259	-0.0262788	0.408662	2.07656	0.045224	-1.59227
chr2L	9910000	9920000	-0.127868	0.0356425	12.5942	0.286765	0.0138729	6.62732	-0.0229349	0.466547	0.730076	0.097077	5.91991
chr2L	9920000	9930000	-0.148248	0.0330113	12.6135	0.171853	0.0378953	6.18942	-0.0223844	0.466547	0.320403	0.472841	4.46021
chr2L	9930000	9940000	-0.0486244	0.302928	12.4878	0.123936	0.138402	6.15183	-0.0223844	0.466547	0.650372	0.187382	4.31169
chr2L	9940000	9950000	0.0523419	0.360925	12.5626	0.358757	0.00251382	6.75241	-0.0240869	0.375364	0.330225	0.464281	4.05651
chr2L	9950000	9960000	-0.238049	3.07e-06	12.5642	0.197505	0.0630994	6.43103	-0.0226959	0.354615	1.21532	0.131389	-1.56173
chr2L	9960000	9970000	-0.197957	0.00736829	12.6073	0.211628	0.0169372	6.32964	-0.0200496	0.45366	0.611627	0.150305	6.11547
chr2L	9970000	9980000	0.575846	1.61e-15	13.2279	-0.780424	9.57e-10	6.92018	-0.0172693	0.545237	3.54671	0.018867	-3.04817
chr2L	9980000	9990000	-0.0262075	0.620403	12.5514	0.291818	0.018771	7.03735	-0.0142818	0.597524	-0.858383	0.158188	1.85139
chr2L	9990000	10000000	-0.020287	0.77178	12.6249	0.239917	0.0299178	6.44905	-0.0121303	0.672569	-0.609984	0.240831	4.97682
chr2L	10000000	10010000	-0.0423198	0.436172	12.5573	0.214612	0.0492579	6.51434	-0.011119	0.597524	1.71435	0.006843	7.06168
chr2L	10010000	10020000	0.0587456	0.279264	12.4505	0.0165353	0.850205	5.86121	-0.010247	0.597524	0.894734	0.054617	5.98675
chr2L	10020000	10030000	-0.160185	0.0230114	12.607	0.0486723	0.572334	5.84037	-0.00131764	0.541943	-0.327215	0.822354	-3.25389
chr2L	10030000	10040000	-0.106331	0.0280944	12.4826	0.288729	0.0069157	6.40787	0.00780662	0.541943	-0.476158	0.273397	4.90119
chr2L	10040000	10050000	-0.0808479	0.121475	12.4411	0.0474385	0.600144	5.76344	0.00780662	0.633318	-4.09263	0.008074	-1.99873
chr2L	10050000	10060000	-0.149421	0.00540148	12.4493	0.28313	0.00744843	6.4168	0.00780662	0.686281	-4.09263	0.008074	-1.99873
chr2L	10060000	10070000	-0.123199	0.0200565	12.508	0.072254	0.416222	5.74469	0.00780662	0.670181	0.914611	0.056458	7.75688
chr2L	10070000	10080000	-0.171064	0.00166931	12.5386	0.101902	0.271167	5.6432	0.00780662	0.684498	-1.43843	0.119058	-0.786322
chr2L	10080000	10090000	-0.0232136	0.643303	12.5516	0.0699571	0.447808	5.82534	0.0043161	0.684498	-1.43843	0.119058	-0.786322
chr2L	10090000	10100000	-0.0940647	0.0506993	12.5143	0.0938079	0.273329	5.69525	0.000699125	0.611724	-3.83647	0.008715	-2.78835
chr2L	10100000	10110000	-0.179167	0.000159669	12.4725	0.0429584	0.62297	5.75779	-0.00462018	0.611724	-0.75604	0.373563	-1.4829
chr2L	10110000	10120000	-0.0587802	0.232636	12.4203	0.0139774	0.932426	5.37524	-0.0052827	0.684498	-0.75604	0.373563	-1.4829
chr2L	10120000	10130000	-0.116627	0.0137357	12.4961	0.0631772	0.532249	5.53092	-0.0052827	0.684498	-1.80689	0.07896	-2.05971
chr2L	10130000	10140000	0.427225	1.5e-09	12.8007	-0.0122738	0.905167	5.91884	-0.0052827	0.611724	-1.58219	0.001288	6.01437
chr2L	10140000	10150000	0.690119	2.13e-22	12.9627	-0.00583601	0.952511	6.14899	-0.000387321	0.493191	-1.58219	0.001288	6.01437
chr2L	10150000	10160000	0.0808031	0.223279	12.2496	-0.466637	7.02e-07	5.7339	0.000699125	0.37811	-0.602789	0.364899	1.33591
chr2L	10160000	10170000	0.115111	0.0370309	12.3956	-0.472741	3.2e-07	5.6528	0.014147	0.333386	-0.374505	0.380105	5.86604
chr2L	10170000	10180000	-0.0547051	0.324767	12.409	-0.210865	0.510973	5.01004	0.0320471	0.280111	-1.45143	0.282239	-2.83783
chr2L	10180000	10190000	-0.082069	0.126212	12.4483	0.0974673	0.287879	5.77193	0.0358745	0.204314	-1.58037	0.064568	0.877343
chr2L	10190000	10200000	0.101211	0.036238	12.4872	0.0484297	0.577558	5.80719	0.037425	0.139047	2.01395	0.005175	3.75764
chr2L	10200000	10210000	0.111879	0.0349962	12.5593	0.0282172	0.731751	6.23112	0.0388934	0.137908	2.01395	0.005175	3.75764
chr2L	10210000	10220000	-0.0259237	0.577202	12.5047	-0.0139488	0.879882	5.89848	0.0388934	0.137908	1.34955	0.024203	2.82507
chr2L	10220000	10230000	0.0965035	0.253633	12.7561	-0.254668	0.00704581	5.75396	0.0388934	0.137908	1.30552	0.019024	5.80632
chr2L	10230000	10240000	0.5679	1.03e-11	13.2542	-0.494808	5.65e-05	5.5117	0.037425	0.137908	2.0378	0.00268	8.19135
chr2L	10240000	10250000	-0.00675856	0.92122	12.461	-0.0627436	0.469949	6.10316	0.0358745	0.139047	2.0378	0.00268	8.19135
chr2L	10250000	10260000	0.134102	0.149106	12.4366	-0.27562	0.0373637	5.48645	0.0293573	0.246698	1.36836	0.017456	6.24593
chr2L	10260000	10270000	-0.0313179	0.681465	12.5565	-0.240963	0.0132512	5.91711	0.0175044	0.526657	1.36836	0.017456	6.24593
chr2L	10270000	10280000	0.181181	0.00433884	12.4213	-0.190052	0.0372074	5.70177	0.0132997	0.638997	0.692557	0.130407	5.65778
chr2L	10280000	10290000	-0.154647	0.00246752	12.5664	0.209417	0.0108414	6.10713	0.0132997	0.638997	-1.12384	0.264195	-2.07565
chr2L	10290000	10300000	0.410375	6.69e-08	12.3317	-0.369058	0.0814583	5.3585	0.0132997	0.638997	2.40598	0.020017	-1.52976
chr2L	10300000	10310000	0.133083	0.0523757	12.637	-0.00778838	0.931757	6.25785	0.0132997	0.638997	2.40598	0.020017	-1.52976
chr2L	10310000	10320000	-0.0134777	0.825024	12.5723	-0.0187889	0.848381	5.94701	0.0108513	0.697336	0.551805	0.20488	5.66679
chr2L	10320000	10330000	0.201342	0.000114363	12.4961	-0.148003	0.115739	5.64907	0.0132997	0.637305	3.8453	0.12045	-4.30798
chr2L	10330000	10340000	0.242904	2.36e-06	12.4291	-0.000441379	0.999804	6.12412	0.0130311	0.637305	0.846363	0.074965	5.73995
chr2L	10340000	10350000	0.128641	0.0208799	12.4719	-0.130777	0.178236	5.60884	0.0130311	0.637305	-3.17759	0.000297	-1.68791
chr2L	10350000	10360000	0.568759	1.71e-16	12.819	0.0289722	0.743709	5.84355	0.0130311	0.637305	-3.97839	0	2.87191
chr2L	10360000	10370000	0.173422	0.00881718	12.6172	0.0832699	0.299112	6.21692	0.0130311	0.637305	1.03269	0.022122	6.44795
chr2L	10370000	10380000	-0.0116756	0.869288	12.6048	0.146729	0.070027	6.077	0.00790017	0.603966	0.397515	0.337468	6.74828
chr2L	10380000	10390000	0.194391	0.00105975	12.547	-0.174108	0.111802	5.83461	0.00518441	0.603966	0.691326	0.167449	3.71662
chr2L	10390000	10400000	-0.0409637	0.613359	12.3719	-0.00460369	0.966453	5.70161	0.000448957	0.611964	0.854243	0.07156	7.12543
chr2L	10400000	10410000	0.550566	5.68e-14	13.0093	-0.113051	0.201069	5.91332	-0.00449298	0.624396	-4.25024	2.2e-05	-1.60082
chr2L	10410000	10420000	0.020012	0.705333	12.3992	0.00698289	0.939554	5.99296	-0.00449298	0.540717	0.767673	0.085657	6.88511
chr2L	10420000	10430000	-0.0210604	0.721946	12.5711	0.0766978	0.359379	6.32421	-0.00667977	0.64045	1.01808	0.020769	6.47116
chr2L	10430000	10440000	-0.0215485	0.668922	12.546	0.124469	0.12012	6.24748	-0.00667977	0.540717	0.877909	0.075056	5.14155
chr2L	10440000	10450000	0.109301	0.128525	12.3132	-0.0994242	0.483673	5.4295	-0.00667977	0.483114	-1.85613	0.037512	1.28145
chr2L	10450000	10460000	0.0261043	0.707712	12.2989	0.0267192	0.78063	5.61771	-0.00667977	0.43596	-1.85613	0.037512	1.28145
chr2L	10460000	10470000	0.024423	0.73815	12.2869	-0.0939586	0.379075	5.53396	0.00568466	0.30833	-3.13988	0.00319	0.939093
chr2L	10470000	10480000	0.136781	0.0183396	12.3453	-0.0765148	0.382148	5.7719	0.0285493	0.159302	-3.13988	0.00319	0.939093
chr2L	10480000	10490000	-0.0573423	0.313954	12.4854	-0.103413	0.283662	5.80444	0.0472938	0.084976	1.24427	0.027994	3.33054
chr2L	10490000	10500000	-0.121414	0.0282427	12.4567	0.137127	0.115197	5.8233	0.0576044	0.0414916	0.447578	0.37244	2.59054
chr2L	10500000	10510000	-0.0514495	0.310568	12.3946	-0.0070705	0.939151	6.12609	0.0587704	0.0414916	0.851952	0.220999	1.42617
chr2L	10510000	10520000	-0.105132	0.0322088	12.4904	0.242774	0.00323231	6.25729	0.0587704	0.0414916	0.851952	0.220999	1.42617
chr2L	10520000	10530000	-0.0233309	0.697039	12.3439	0.170941	0.0509983	5.71836	0.0587704	0.0414916	-1.3991	0.104017	-0.335327
chr2L	10530000	10540000	0.0857158	0.116642	12.3057	0.0529759	0.606429	5.52948	0.0587704	0.0414916	-1.3991	0.104017	-0.335327
chr2L	10540000	10550000	-0.0676672	0.183302	12.4118	0.0105802	0.903477	5.71659	0.0587704	0.05036	0.341643	0.485864	3.20633
chr2L	10550000	10560000	0.0104406	0.837928	12.445	-0.0756467	0.490936	5.49189	0.0510024	0.0886177	0	-1	0
chr2L	10560000	10570000	0.0467534	0.360672	12.4094	-0.109209	0.320984	5.50453	0.0319795	0.0942018	0.42673	0.510615	0.144198
chr2L	10570000	10580000	-0.0706407	0.224719	12.3705	0.0595493	0.498981	5.7541	0.0142058	0.0942018	0.457035	0.467754	0.404652
chr2L	10580000	10590000	-0.0835299	0.17652	12.3609	0.0625706	0.472749	5.84715	-0.00207346	0.0977914	0.457035	0.467754	0.404652
chr2L	10590000	10600000	0.308814	4.07e-08	12.4241	-0.359848	0.000153216	5.85018	-0.0309332	0.0977914	-0.61146	0.286816	2.60242
chr2L	10600000	10610000	-0.112655	0.0402768	12.3315	0.0522472	0.550135	5.81636	-0.0547199	0.0977914	-0.61146	0.286816	2.60242
chr2L	10610000	10620000	-0.0838752	0.209005	12.4233	0.292778	0.015457	6.84375	-0.0658034	0.0665258	0.665032	0.1572	4.15215
chr2L	10620000	10630000	-0.0258057	0.608557	12.4233	0.106233	0.223228	5.82692	-0.0718126	0.058973	0.665032	0.1572	4.15215
chr2L	10630000	10640000	-0.129547	0.0114526	12.4153	0.253095	0.00335162	6.01105	-0.0736022	0.0470638	0.867472	0.270329	-1.47946
chr2L	10640000	10650000	0.0334082	0.575559	12.3696	0.0878957	0.332122	5.90061	-0.0809504	0.0285376	0.528602	0.703449	-3.28186
chr2L	10650000	10660000	-0.0909485	0.0989472	12.367	0.149438	0.0675596	6.01118	-0.0886573	0.0169516	0.530488	0.711892	-1.94594
chr2L	10660000	10670000	-0.105499	0.0412044	12.4534	0.213601	0.00955207	6.25245	-0.0897402	0.0169516	-3.18255	0.001859	0.37284
chr2L	10670000	10680000	-0.0756072	0.132256	12.4523	0.44238	3.57e-08	6.14121	-0.093424	0.0151662	-3.18255	0.001859	0.37284
chr2L	10680000	10690000	0.0727679	0.305522	12.2144	0.130425	0.139403	5.65366	-0.093424	0.0151662	-2.87706	0.010845	0.590976
chr2L	10690000	10700000	-0.0630314	0.207274	12.4531	0.150006	0.098607	5.78667	-0.093424	0.0151662	-2.38195	0.070748	-0.274343
chr2L	10700000	10710000	-0.163686	0.000898053	12.4575	0.204274	0.025755	5.8411	-0.0897402	0.0169516	-3.70915	0.00021	0.285794
chr2L	10710000	10720000	-0.0829206	0.108539	12.4438	-0.0523266	0.606836	5.60218	-0.0897402	0.0198406	-4.41178	0.156001	-4.10773
chr2L	10720000	10730000	-0.0087413	0.884303	12.3022	0.0127841	0.888634	5.70119	-0.0858493	0.0321533	0.414333	0.364503	4.22532
chr2L	10730000	10740000	-0.135629	0.0896622	12.7404	0.246852	0.00331023	6.2856	-0.0734548	0.0717707	1.60339	0.027862	3.00242
chr2L	10740000	10750000	-0.0796151	0.102099	12.4611	0.0929542	0.317918	5.77192	-0.0559566	0.14481	0.349191	0.44247	5.66312
chr2L	10750000	10760000	-0.0449872	0.418451	12.4576	0.16665	0.039854	6.21055	-0.0452118	0.189968	0.215576	0.723085	4.47371
chr2L	10760000	10770000	-0.173839	0.00460503	12.5812	0.215471	0.0102283	6.30607	-0.0403118	0.203302	1.56872	0.0084	6.32842
chr2L	10770000	10780000	-0.0874994	0.0885885	12.5525	0.105619	0.21926	5.82961	-0.0351427	0.239567	0.646125	0.230254	5.67986
chr2L	10780000	10790000	-0.00901715	0.85838	12.4748	-0.018425	0.859264	5.62183	-0.0271208	0.292266	0.439444	0.371147	6.02255
chr2L	10790000	10800000	-0.0379952	0.464631	12.4736	0.2203	0.00920638	6.32051	-0.00849315	0.345736	0.0585851	0.919374	2.54623
chr2L	10800000	10810000	-0.164809	0.000451844	12.4948	0.268445	0.0136661	6.47611	0.00679417	0.389079	1.56622	0.020403	3.44515
chr2L	10810000	10820000	-0.0200678	0.687646	12.5079	0.0116308	0.895928	5.66136	0.013794	0.389079	1.72576	0.17045	-2.80948
chr2L	10820000	10830000	-0.066584	0.170158	12.4666	-0.00935024	0.949438	5.44255	0.0201444	0.389079	-1.95655	0.113604	-0.173123
chr2L	10830000	10840000	0.0307413	0.556055	12.4035	-0.0652026	0.51946	5.55439	0.0232811	0.389079	-0.765531	0.390781	-2.30724
chr2L	10840000	10850000	-0.207664	0.00331045	12.6129	0.15552	0.0523531	6.2214	0.0250021	0.345736	0.827983	0.064438	8.17366
chr2L	10850000	10860000	-0.149524	0.0139248	12.5849	0.170438	0.0346151	6.1551	0.031049	0.243185	2.49159	0.008123	1.64926
chr2L	10860000	10870000	0.36323	1.8e-07	12.7442	0.0299493	0.712697	6.0191	0.0435173	0.118809	-1.75141	0.002827	4.19081
chr2L	10870000	10880000	0.0431071	0.500265	12.2872	-0.527036	6.62e-08	5.61451	0.0520406	0.0612654	-0.813502	0.065332	5.68143
chr2L	10880000	10890000	0.0120356	0.853728	12.2169	-0.862499	0.000138616	5.31596	0.055429	0.0514115	-0.813502	0.065332	5.68143
chr2L	10890000	10900000	-0.115802	0.0208155	12.4474	-0.0426496	0.868206	5.28701	0.0574161	0.0488063	1.0082	0.738581	-4.44713
chr2L	10900000	10910000	-0.0264777	0.596011	12.4506	-0.0655622	0.613746	5.44653	0.0650723	0.0307718	0.738185	0.767573	-3.85673
chr2L	10910000	10920000	-0.127491	0.0240409	12.3375	0.0855536	0.40082	5.54556	0.0684219	0.0198629	-0.814546	0.5718	-3.02398
chr2L	10920000	10930000	-0.151144	0.00131231	12.5184	0.0610318	0.50275	5.69857	0.0755228	0.0144361	-0.814546	0.5718	-3.02398
chr2L	10930000	10940000	0.00117638	0.991319	12.5085	0.0410409	0.690443	5.53223	0.0755228	0.0144361	-2.59721	0.555096	-4.5871
chr2L	10940000	10950000	0.0861092	0.115132	12.3628	-0.749387	1.29e-15	5.79046	0.0684219	0.0198629	-4.41216	0.042875	-4.08039
chr2L	10950000	10960000	0.360583	2.49e-07	12.3267	-1.77654	3.73e-60	5.79778	0.0659596	0.0283195	-0.268881	0.61051	2.70607
chr2L	10960000	10970000	-0.0369515	0.470804	12.4653	0.073853	0.3736	6.02003	0.0644031	0.0381396	0.832828	0.057114	7.6438
chr2L	10970000	10980000	-0.0327478	0.529897	12.4403	0.21356	0.00920815	6.19659	0.0611178	0.0459692	0.832828	0.057114	7.6438
chr2L	10980000	10990000	0.130727	0.00772099	12.5588	0.0772733	0.342344	6.05164	0.0644031	0.0381396	1.26006	0.015922	3.46611
chr2L	10990000	11000000	0.0966001	0.148647	12.4208	0.0305658	0.737564	5.728	0.0659596	0.0283195	1.71619	0.032904	1.49352
chr2L	11000000	11010000	-0.122753	0.0208019	12.5258	0.122926	0.24758	6.40188	0.0644031	0.0381396	1.71619	0.032904	1.49352
chr2L	11010000	11020000	-0.0407747	0.40797	12.557	0.160057	0.0484769	6.20288	0.0611178	0.0473598	1.90353	0.00723	5.27716
chr2L	11020000	11030000	-0.202411	0.00078811	12.5828	0.472869	0.0002097	6.96036	0.0573882	0.0522651	0.388111	0.361843	6.82965
chr2L	11030000	11040000	-0.134474	0.0484365	12.6167	0.101258	0.205332	6.23302	0.0556182	0.0567225	0.565943	0.192312	6.53311
chr2L	11040000	11050000	-0.00348812	0.962745	12.5923	0.11065	0.184086	6.30563	0.0527298	0.0567711	0.565943	0.192312	6.53311
chr2L	11050000	11060000	0.0520458	0.322738	12.3614	0.321861	0.011382	6.88324	0.0497328	0.0862529	0.565943	0.192312	6.53311
chr2L	11060000	11070000	-0.0747983	0.135724	12.5292	0.323144	0.00981529	7.09463	0.0497328	0.0908473	0.565943	0.192312	6.53311
chr2L	11070000	11080000	-0.0832365	0.136592	12.4867	0.234436	0.0412035	6.56747	0.0497328	0.111501	1.75607	0.025875	0.186108
chr2L	11080000	11090000	-0.0678874	0.158905	12.5147	0.0686305	0.451594	5.66458	0.0489142	0.114536	-1.99192	0.095279	-2.64036
chr2L	11090000	11100000	-0.165566	0.000696002	12.5338	0.150522	0.0670801	6.20044	0.0489142	0.114536	0.54739	0.203456	7.51129
chr2L	11100000	11110000	-0.189809	0.000186573	12.5378	0.229647	0.0112619	6.37293	0.0471717	0.114536	0.54739	0.203456	7.51129
chr2L	11110000	11120000	-0.104641	0.0876558	12.5503	0.281817	0.000597577	6.17235	0.0451309	0.114536	0.374086	0.382841	4.81222
chr2L	11120000	11130000	-0.0538977	0.360886	12.5578	0.250755	0.0024334	6.31896	0.0470989	0.103194	0.513922	0.301831	2.89814
chr2L	11130000	11140000	-0.0613189	0.317292	12.6007	0.151904	0.0611016	6.19449	0.0464064	0.103194	-1.12039	0.199815	-2.06398
chr2L	11140000	11150000	0.0891683	0.126422	12.3481	-0.0684083	0.52251	5.52618	0.0442809	0.103194	-0.500795	0.614114	-2.88795
chr2L	11150000	11160000	0.0914118	0.0757036	12.4501	0.0226454	0.81447	5.94649	0.0442809	0.103194	1.07319	0.016597	5.44559
chr2L	11160000	11170000	-0.137004	0.0102942	12.5492	0.181595	0.0323425	5.92364	0.0430236	0.103194	-1.4505	0.082141	0.910324
chr2L	11170000	11180000	-0.0692523	0.199038	12.5633	0.239359	0.0445415	6.77424	0.0398466	0.132667	5.63776	0.000832	-0.922717
chr2L	11180000	11190000	-0.141081	0.0051986	12.5401	0.310317	0.0150913	7.24369	0.0266889	0.356576	0.43158	0.365119	3.50819
chr2L	11190000	11200000	-0.076557	0.166767	12.539	0.137847	0.0875108	6.19006	0.0109189	0.58991	-1.1162	0.283211	-2.83343
chr2L	11200000	11210000	-0.270255	5.94e-05	12.6117	0.146726	0.0770061	6.01421	0.00633532	0.712941	-1.1162	0.283211	-2.83343
chr2L	11210000	11220000	0.116062	0.0222221	12.4688	0.00311187	0.976034	6.72862	0.00409642	0.802097	-0.27838	0.52203	4.49476
chr2L	11220000	11230000	-0.247947	0.000641159	12.701	0.339277	0.00299284	6.59388	0.00132768	0.802097	0.526223	0.420942	1.27926
chr2L	11230000	11240000	-0.26295	5.4e-07	12.5695	0.07336	0.399587	5.7806	0.00132768	0.802097	-0.104738	0.804195	7.66905
chr2L	11240000	11250000	-0.33347	5.7e-06	12.69	0.211112	0.0236395	5.9536	0.00132768	0.802097	-0.104738	0.804195	7.66905
chr2L	11250000	11260000	-0.248454	0.00047215	12.645	0.150673	0.0826537	5.89137	0.00166481	0.802097	-0.104738	0.804195	7.66905
chr2L	11260000	11270000	-0.0175054	0.755625	12.5855	0.0776976	0.363681	6.04987	0.00166481	0.768909	0.605353	0.194576	6.4731
chr2L	11270000	11280000	-0.073882	0.262496	12.6007	0.384878	0.000396302	6.45519	0.00228036	0.768909	0.605353	0.194576	6.4731
chr2L	11280000	11290000	-0.108514	0.0183135	12.4974	0.156529	0.052272	6.17294	0.000796066	0.72662	0.605353	0.194576	6.4731
chr2L	11290000	11300000	-0.127579	0.0307139	12.4887	0.130686	0.114331	6.00717	0.000796066	0.72662	-1.88662	1	-4.68158
chr2L	11300000	11310000	-0.151725	0.0106903	12.3621	0.330308	0.00251362	6.45862	0.000796066	0.676839	-0.852912	1	-4.63498
chr2L	11310000	11320000	0.179518	0.000522146	12.5252	0.119236	0.274116	6.44385	-0.00516597	0.618188	-0.45287	0.492387	1.18321
chr2L	11320000	11330000	-0.102697	0.0534425	12.412	0.33728	0.00354116	6.68594	-0.0100698	0.527171	0	-1	0
chr2L	11330000	11340000	-0.0758038	0.137037	12.3857	0.0556333	0.536983	5.89162	-0.0230737	0.413719	-2.71162	0.592725	-4.56953
chr2L	11340000	11350000	-0.0833846	0.191605	12.2462	-0.0201357	0.822094	5.72129	-0.0277466	0.319209	0.842183	0.576741	-2.50052
chr2L	11350000	11360000	-0.086197	0.244369	12.1529	0.0930534	0.268749	5.99348	-0.0322408	0.254206	0.478379	0.270259	6.42616
chr2L	11360000	11370000	-0.122849	0.022556	12.373	0.209342	0.0120698	6.30832	-0.0349859	0.211432	0.478379	0.270259	6.42616
chr2L	11370000	11380000	-0.104357	0.0447085	12.413	0.314732	0.00569955	6.48591	-0.0400149	0.130147	0.478379	0.270259	6.42616
chr2L	11380000	11390000	-0.00308565	0.972762	12.2038	0.414797	0.000151748	6.51642	-0.0472327	0.0695079	-0.0339565	1	-3.57061
chr2L	11390000	11400000	-0.0827287	0.196058	12.2549	0.311455	0.00730973	6.66324	-0.0472327	0.0695079	-0.0339565	1	-3.57061
chr2L	11400000	11410000	-0.070984	0.293603	12.3152	0.266706	0.0235271	6.70552	-0.0504949	0.0609811	2.0208	0.091871	-2.98432
chr2L	11410000	11420000	-0.0790202	0.188592	12.2947	0.0877204	0.281046	6.06529	-0.0526352	0.0516914	0	-1	0
chr2L	11420000	11430000	-0.0873483	0.216066	12.1331	0.131357	0.125389	5.77616	-0.0551185	0.0420825	0	-1	0
chr2L	11430000	11440000	-0.155193	0.00461238	12.4101	0.222247	0.00506107	6.20246	-0.0568764	0.036446	0.661766	0.156567	6.52941
chr2L	11440000	11450000	-0.083147	0.145371	12.2909	0.247186	0.0381216	6.65138	-0.0586174	0.0341904	0.661766	0.156567	6.52941
chr2L	11450000	11460000	-0.0533221	0.330732	12.3553	0.145178	0.0766206	6.02574	-0.0624085	0.0254308	0	-1	0
chr2L	11460000	11470000	-0.0957899	0.106087	12.41	0.161688	0.0644907	5.93338	-0.0689208	0.0166538	0	-1	0
chr2L	11470000	11480000	-0.00185286	0.98259	12.418	0.0913488	0.299561	5.78527	-0.0705848	0.0166538	0	-1	0
chr2L	11480000	11490000	0.0902667	0.114606	12.3511	-0.0191995	0.901986	5.41562	-0.0801474	0.0124051	-1.45758	0.194488	-1.20463
chr2L	11490000	11500000	-0.0749955	0.201111	12.4135	0.177061	0.041854	5.92513	-0.0862753	0.0124051	0.452687	0.374968	2.48413
chr2L	11500000	11510000	-0.0445837	0.360561	12.4811	0.273214	0.00369435	6.38413	-0.0885035	0.0124051	0.359379	0.392696	6.4866
chr2L	11510000	11520000	-0.112834	0.0433791	12.5485	0.252226	0.00239651	6.31966	-0.0885035	0.0124051	0.359379	0.392696	6.4866
chr2L	11520000	11530000	0.0601001	0.341	12.3882	0.08926	0.30007	5.73278	-0.0885035	0.0124051	-3.14441	0.030037	-3.15332
chr2L	11530000	11540000	0.00468343	0.934685	12.4027	0.001449	0.989409	5.39865	-0.0885035	0.0189359	-3.14441	0.030037	-3.15332
chr2L	11540000	11550000	0.78156	2.84e-26	12.6435	-1.25619	1.54e-20	6.1682	-0.0885035	0.0319838	-1.23894	0.371883	-3.87526
chr2L	11550000	11560000	-0.0625182	0.376637	12.1715	-0.0700716	0.712929	5.37143	-0.07643	0.0440581	0.103309	1	-4.68668
chr2L	11560000	11570000	0.37145	1.93e-08	12.2795	-1.0351	3.06e-26	5.97327	-0.0608711	0.0645668	-1.49217	0.015414	5.90865
chr2L	11570000	11580000	-0.0486332	0.497904	12.1039	-0.0841871	0.677001	5.35273	-0.0433795	0.209328	0	-1	0
chr2L	11580000	11590000	-0.108194	0.102981	12.0723	0.0441294	0.640238	5.6694	-0.0272837	0.381735	-1.8786	0.032417	-1.17521
chr2L	11590000	11600000	0.0309666	0.639231	12.0016	-0.0200869	0.933335	5.32691	-0.0272837	0.381735	-4.18991	0.135491	-4.16221
chr2L	11600000	11610000	0.0292878	0.680835	11.8457	0.0352176	0.733545	5.50644	-0.0272837	0.381735	-2.56492	0.586937	-4.59052
chr2L	11610000	11620000	0.0995887	0.152929	12.0535	-0.195339	0.0244867	5.74035	-0.0272837	0.381735	-2.41539	0.153562	-3.61311
chr2L	11620000	11630000	0.00487787	0.949058	12.0313	0.0571457	0.581947	5.53982	-0.0272837	0.381735	-1.60657	0.056115	0.458103
chr2L	11630000	11640000	0.0383198	0.570195	11.8589	0.0600523	0.526804	5.59215	-0.0288293	0.308005	0	-1	0
chr2L	11640000	11650000	0.0386091	0.618647	11.8883	0.171977	0.0588417	5.69735	-0.0416414	0.127373	0.235538	0.867793	-3.05229
chr2L	11650000	11660000	0.0661243	0.349228	11.9059	0.17437	0.0819338	5.59248	-0.0558118	0.0495306	0.96233	0.624702	-3.79653
chr2L	11660000	11670000	-0.0273273	0.689132	11.9249	0.00554689	0.971787	5.36271	-0.0617779	0.0376221	2.18282	0.293175	-4.16583
chr2L	11670000	11680000	-0.0276574	0.746753	11.916	0.055891	0.598262	5.52578	-0.0626678	0.0376221	0	-1	0
chr2L	11680000	11690000	-0.0654691	0.365203	12.0125	0.0870843	0.324267	5.65514	-0.0626678	0.0376221	0	-1	0
chr2L	11690000	11700000	-0.0154177	0.820772	12.05	0.0610242	0.551815	5.54268	-0.0626678	0.0376221	-0.0541522	1	-3.31653
chr2L	11700000	11710000	0.0619941	0.384417	11.85	0.00634336	0.969537	5.3435	-0.0626678	0.0376221	0	-1	0
chr2L	11710000	11720000	0.353086	5.67e-05	12.0153	-0.857408	1.14e-14	5.53552	-0.0626678	0.0586482	-0.448448	0.420497	2.08705
chr2L	11720000	11730000	0.0345491	0.604594	12.007	-0.0394276	0.691314	5.62376	-0.0564735	0.0940366	-0.69838	0.242481	1.89953
chr2L	11730000	11740000	0.0116054	0.86526	12.1144	0.0660116	0.496055	5.57941	-0.0465793	0.129386	-2.42565	0.033112	1.73231
chr2L	11740000	11750000	0.0874557	0.189258	12.1524	0.0836144	0.35905	5.63583	-0.038152	0.181926	-2.75342	0.0138	-0.849478
chr2L	11750000	11760000	0.0202724	0.745671	12.1724	-0.025716	0.909603	5.33375	-0.0324778	0.24775	-0.0159585	1	-4.72692
chr2L	11760000	11770000	0.0677887	0.24269	12.2596	0.0206499	0.896324	5.39324	-0.031274	0.291305	0	1	-4.80255
chr2L	11770000	11780000	-0.113731	0.0573587	12.3494	0.0516828	0.632485	5.50186	-0.0281871	0.319015	0	-1	0
chr2L	11780000	11790000	0.0531788	0.315358	12.3787	-0.0417324	0.790923	5.40501	-0.0223194	0.351572	6.0141	0.000231	0.761878
chr2L	11790000	11800000	-0.00557289	0.918374	12.5285	0.144914	0.0782638	5.98751	-0.0112581	0.389927	1.18302	0.034089	7.77414
chr2L	11800000	11810000	0.0151923	0.82542	12.6196	0.34562	0.00815326	7.20825	-0.00332353	0.644891	0.950549	0.083281	2.6858
chr2L	11810000	11820000	-0.13681	0.0136612	12.5277	0.0260644	0.779977	5.85468	-0.00332353	0.67885	-1.10768	0.150023	0.779026
chr2L	11820000	11830000	-0.122389	0.0300673	12.5353	0.124232	0.123802	6.04874	-0.00332353	0.813347	-1.10768	0.150023	0.779026
chr2L	11830000	11840000	-0.0614123	0.296183	12.3587	0.029834	0.792618	5.47709	-0.00332353	0.888868	-1.12402	0.262324	-1.68214
chr2L	11840000	11850000	0.0389627	0.533277	12.3685	-0.0133182	0.917693	5.48338	-0.00332353	0.888868	-1.73993	0.069014	-0.885713
chr2L	11850000	11860000	-0.0491738	0.361261	12.5229	0.118053	0.200742	5.65808	-0.00378948	0.813347	-2.95539	0	4.58647
chr2L	11860000	11870000	0.0118741	0.831335	12.4282	0.0186926	0.916813	5.36464	-0.00736678	0.617539	-2.95539	0	4.58647
chr2L	11870000	11880000	-0.0831349	0.145086	12.3313	0.27446	0.00170219	5.86272	-0.0160003	0.617539	-2.95539	0	4.58647
chr2L	11880000	11890000	-0.0431444	0.405036	12.3895	-0.0317598	0.873127	5.36683	-0.0230477	0.471589	-2.95539	0	4.58647
chr2L	11890000	11900000	0.248002	6.64e-06	12.5617	0.0683746	0.447404	5.80155	-0.0253199	0.395037	-3.45049	0	4.45546
chr2L	11900000	11910000	-0.055248	0.35664	12.3813	-0.050768	0.765224	5.3962	-0.0283668	0.316237	-3.45049	0	4.45546
chr2L	11910000	11920000	-0.0532966	0.292832	12.4053	-0.104093	0.638107	5.32136	-0.0325751	0.246701	-2.95539	0	4.58647
chr2L	11920000	11930000	-0.0346367	0.529802	12.438	0.0814182	0.500534	5.45791	-0.0346115	0.186802	-2.95539	0	4.58647
chr2L	11930000	11940000	0.0755339	0.162264	12.3945	-0.20993	0.404784	5.27456	-0.0350813	0.158364	1.08766	0.60879	-4.18636
chr2L	11940000	11950000	-0.0204324	0.719879	12.4533	0.0711008	0.436635	5.75241	-0.0350813	0.158364	-1.61206	0.383721	-3.65124
chr2L	11950000	11960000	-0.0874088	0.124242	12.5902	0.172258	0.0326522	6.15632	-0.0350813	0.158364	0.811241	0.059376	5.87847
chr2L	11960000	11970000	-0.0255442	0.639714	12.5445	0.445242	0.000729166	7.37753	-0.0350813	0.158364	0.811241	0.059376	5.87847
chr2L	11970000	11980000	0.0195708	0.700125	12.4866	0.254035	0.00562659	6.37952	-0.0347314	0.16243	0.811241	0.059376	5.87847
chr2L	11980000	11990000	-0.129946	0.00761075	12.5448	0.186784	0.0786711	6.42058	-0.0325346	0.215483	0.62647	0.151452	6.01074
chr2L	11990000	12000000	-0.0761156	0.293833	13.0879	0.0757269	0.530072	6.9691	-0.0289486	0.275111	0.598327	0.169	4.8259
chr2L	12000000	12010000	-0.475268	4.52e-10	12.8007	0.540957	0.000131848	7.80065	-0.0254907	0.344699	0.659802	0.361449	-1.26714
chr2L	12010000	12020000	-0.293241	6.69e-05	12.6914	0.466824	0.000911291	7.68344	-0.0225996	0.398387	0.179694	0.67862	4.51888
chr2L	12020000	12030000	-0.000766812	1	12.3843	0.224066	0.0422543	6.5424	-0.0186444	0.49345	0.421217	0.360192	3.97515
chr2L	12030000	12040000	-0.163886	0.030118	12.616	0.17588	0.0314789	6.09769	-0.0176205	0.564195	0.545793	0.338468	1.98845
chr2L	12040000	12050000	-0.0648471	0.34866	12.639	0.075767	0.490461	6.46667	-0.0176205	0.564195	1.39986	0.027739	7.57929
chr2L	12050000	12060000	-0.168086	0.00438398	12.5878	0.157356	0.0588709	6.2499	-0.0176205	0.564195	0.806173	0.059814	5.19633
chr2L	12060000	12070000	0.0347233	0.519675	12.3918	-0.129102	0.249573	6.40164	-0.0176205	0.564195	-0.7786	0.079009	5.65823
chr2L	12070000	12080000	0.175648	0.0173161	12.1553	-0.54258	1.14e-07	5.68054	-0.0176205	0.564195	-1.04205	0.073519	1.75991
chr2L	12080000	12090000	-0.186846	0.000138724	12.5479	0.322068	0.000195236	6.11103	-0.0264639	0.393347	-1.27026	0.571627	-3.80225
chr2L	12090000	12100000	-0.0917635	0.0857284	12.5678	0.207897	0.0101765	6.31117	-0.0339277	0.213331	1.92731	0.015196	2.07012
chr2L	12100000	12110000	-0.203255	0.00459315	12.6329	0.188944	0.019424	6.30742	-0.0347286	0.196722	1.00982	0.032821	5.16543
chr2L	12110000	12120000	-0.013267	0.840446	12.3677	0.323704	0.00334908	6.48753	-0.0382889	0.182287	-1.99768	0.11817	-1.01292
chr2L	12120000	12130000	-0.118073	0.0183101	12.5215	0.164786	0.0427144	6.0735	-0.0425472	0.169157	0.423035	0.327521	4.984
chr2L	12130000	12140000	-0.0365275	0.497489	12.4103	0.0768063	0.361045	5.97516	-0.0439373	0.152799	-1.08203	0.703712	-4.38523
chr2L	12140000	12150000	0.140777	0.0497773	12.2773	-0.193429	0.546591	5.03278	-0.0521754	0.0953385	-2.34954	0.028338	-1.71008
chr2L	12150000	12160000	0.0244272	0.717322	12.3472	-0.126812	0.644183	5.23609	-0.0695363	0.0403595	-2.34954	0.028338	-1.71008
chr2L	12160000	12170000	-0.107169	0.0353324	12.4465	0.102624	0.248452	5.81643	-0.0799002	0.0253684	-2.34954	0.028338	-1.71008
chr2L	12170000	12180000	0.134157	0.0429382	12.2299	-0.204984	0.0975148	5.46325	-0.0837789	0.0192001	-3.25158	0.000816	0.521568
chr2L	12180000	12190000	0.0136594	0.783383	12.5294	0.00782873	0.93938	5.56584	-0.0866387	0.0144865	-4.07908	0.083468	-4.21144
chr2L	12190000	12200000	0.00738924	0.901951	12.4273	-0.0148813	0.919092	5.43077	-0.0895287	0.011996	-4.30423	0.061748	-4.12911
chr2L	12200000	12210000	0.0303883	0.634452	12.2856	-0.111589	0.285877	5.54749	-0.094341	0.011996	-2.19972	0.007388	-0.509941
chr2L	12210000	12220000	-0.0366225	0.61199	11.8676	0.00425113	0.979514	4.86032	-0.094341	0.0120741	0.678383	0.168887	3.1915
chr2L	12220000	12230000	0.130457	0.0836832	11.9166	-0.180758	0.603166	4.59052	-0.094341	0.0120741	2.64164	0.014534	5.22557
chr2L	12230000	12240000	0.00668641	0.916107	12.2921	-0.285873	0.37932	5.00126	-0.094341	0.0186879	2.64164	0.014534	5.22557
chr2L	12240000	12250000	0.0719995	0.28961	12.2322	-0.034185	0.917953	5.18179	-0.086669	0.0253684	2.64164	0.014534	5.22557
chr2L	12250000	12260000	0.0467434	0.463532	12.233	-0.0684922	0.781486	5.29587	-0.0805385	0.026111	2.64164	0.014534	5.22557
chr2L	12260000	12270000	0.17083	0.0109177	12.1064	-0.272985	0.420866	4.90028	-0.0687969	0.0330563	2.64164	0.014534	5.22557
chr2L	12270000	12280000	0.0479148	0.489436	12.1766	-0.116488	0.664888	5.24906	-0.0642545	0.0463311	2.64164	0.014534	5.22557
chr2L	12280000	12290000	0.0574164	0.311741	12.2811	-0.093225	0.659906	5.33415	-0.0598421	0.0631286	4.58893	0.005274	-0.424323
chr2L	12290000	12300000	-0.0464082	0.427318	12.282	0.026235	0.827169	5.45337	-0.0561543	0.0724038	2.64164	0.014534	5.22557
chr2L	12300000	12310000	0.071934	0.315879	12.2587	-0.130121	0.484793	5.36582	-0.0488539	0.0776548	2.64164	0.014534	5.22557
chr2L	12310000	12320000	0.119922	0.0932143	12.2174	0.126475	0.26955	5.46319	-0.0355222	0.180704	2.64164	0.014534	5.22557
chr2L	12320000	12330000	0.00219997	0.977167	12.2956	-0.00148827	0.999435	5.44075	-0.0259318	0.281507	0	1	-4.80255
chr2L	12330000	12340000	0.0312595	0.560001	12.3925	0.0488937	0.706109	5.44188	-0.0257517	0.284754	-1.88662	1	-4.68158
chr2L	12340000	12350000	-0.0505787	0.301219	12.4412	0.152051	0.0927101	5.80733	-0.025522	0.295693	-1.55174	0.078495	-0.351447
chr2L	12350000	12360000	-0.0629216	0.204259	12.4424	0.101927	0.244954	5.80767	-0.0222737	0.363691	-1.55174	0.078495	-0.351447
chr2L	12360000	12370000	-0.0469382	0.43585	12.3851	0.07393	0.378864	5.98258	-0.0127715	0.363691	-0.0641084	0.910429	3.27266
chr2L	12370000	12380000	-0.0326244	0.504445	12.4627	-0.0600478	0.740805	5.378	-0.00407717	0.295693	-0.0641084	0.910429	3.27266
chr2L	12380000	12390000	-0.113648	0.0409043	12.4218	0.0238277	0.860897	5.42216	0.00193116	0.295693	-3.60606	0.013123	-3.45921
chr2L	12390000	12400000	-0.0790523	0.154757	12.3824	-0.00924182	0.946467	5.45643	0.00632434	0.295693	-0.328722	0.770845	-1.94187
chr2L	12400000	12410000	0.024568	0.725999	12.3807	-0.277605	0.258903	5.29347	0.0161151	0.277938	-0.506458	0.353944	5.12255
chr2L	12410000	12420000	0.00730302	0.907068	12.3434	0.028949	0.794414	5.49926	0.0287304	0.25376	-0.506458	0.353944	5.12255
chr2L	12420000	12430000	-0.0776635	0.199722	12.401	0.0884873	0.276103	6.3064	0.0324343	0.204865	0.692536	0.133372	4.18804
chr2L	12430000	12440000	-0.183968	0.00840296	12.6498	0.261968	0.0251357	6.65214	0.0330863	0.16739	1.31849	0.01736	6.52614
chr2L	12440000	12450000	-0.0409994	0.432692	12.4354	0.0772207	0.361517	5.86825	0.0355071	0.152862	-2.65968	0.011566	0.642789
chr2L	12450000	12460000	-0.0678285	0.162555	12.535	0.132422	0.117558	6.31677	0.038232	0.127276	-2.65968	0.011566	0.642789
chr2L	12460000	12470000	0.0723136	0.181454	12.3386	-0.0237859	0.790373	5.8423	0.038232	0.127276	-0.860128	0.208012	1.8182
chr2L	12470000	12480000	-0.031306	0.644546	12.3151	-0.297081	0.344132	5.13604	0.038232	0.127276	0.0878636	0.841047	6.8806
chr2L	12480000	12490000	-0.0806409	0.173656	12.3258	-0.165179	0.070475	6.06098	0.038232	0.127276	0.0878636	0.841047	6.8806
chr2L	12490000	12500000	0.049685	0.43923	12.2917	-0.296881	0.325229	5.17503	0.0348551	0.190337	0.254547	0.67868	0.867901
chr2L	12500000	12510000	-0.00375716	0.949618	12.4592	0.0813026	0.339612	6.11179	0.0252722	0.368299	0.156001	0.745937	3.21118
chr2L	12510000	12520000	-0.0474044	0.454124	12.4534	-0.0459112	0.583529	6.22943	0.00683907	0.604433	0.227843	0.583288	6.37808
chr2L	12520000	12530000	0.035916	0.526078	12.312	0.0518924	0.566655	5.99637	-0.000296266	0.685784	0.227843	0.583288	6.37808
chr2L	12530000	12540000	-0.1453	0.0265085	12.603	0.253712	0.00233971	6.01153	-0.00335539	0.685784	0.227843	0.583288	6.37808
chr2L	12540000	12550000	-0.0273383	0.659139	12.3088	-0.000805547	0.99693	6.15657	-0.00685271	0.685784	0.569689	0.346265	1.30357
chr2L	12550000	12560000	0.182624	0.000547481	12.4987	-0.493499	1.26e-08	5.75437	-0.00974682	0.687175	-0.807642	0.19859	1.56324
chr2L	12560000	12570000	0.562956	1.34e-14	13.0635	-0.704915	1.65e-08	6.72667	-0.0125841	0.687175	-0.792309	0.238031	0.931373
chr2L	12570000	12580000	0.0407822	0.589696	12.207	0.0681657	0.446402	5.92742	-0.0135779	0.616097	0.217373	0.9048	-3.36261
chr2L	12580000	12590000	0.0715447	0.245073	12.2496	0.260958	0.00102758	6.2117	-0.0135779	0.616097	1.14546	0.007776	6.09695
chr2L	12590000	12600000	-0.00377336	0.959326	12.3365	0.246251	0.00226026	6.18933	-0.0135779	0.599597	1.14546	0.007776	6.09695
chr2L	12600000	12610000	-0.0783419	0.163127	12.3307	0.279538	0.000481009	6.05143	-0.0135779	0.473698	0.541766	0.355053	1.70248
chr2L	12610000	12620000	-0.0193781	0.745213	12.3133	0.269667	0.00134274	6.31423	-0.0123621	0.354513	0.541766	0.355053	1.70248
chr2L	12620000	12630000	-0.0458336	0.387347	12.4021	0.129856	0.127396	5.86437	-0.00394826	0.346536	0.375465	0.366148	7.45912
chr2L	12630000	12640000	0.0682335	0.261965	12.3741	0.248579	0.00245725	6.19796	0.00976952	0.35493	0	-1	0
chr2L	12640000	12650000	-0.0328508	0.601736	12.2641	0.342377	9.5e-05	6.34674	0.00976952	0.451964	2.42531	0.070107	-3.38735
chr2L	12650000	12660000	0.0122871	0.840119	12.267	0.265091	0.0138127	6.40904	0.00976952	0.451964	0.487995	0.259889	5.04718
chr2L	12660000	12670000	-0.0242605	0.685928	12.4709	0.184935	0.0250216	6.0309	0.00987207	0.562754	0.487995	0.259889	5.04718
chr2L	12670000	12680000	-0.113126	0.026931	12.4035	0.0674998	0.45488	5.67359	0.0110538	0.672616	0.574003	0.191805	4.76713
chr2L	12680000	12690000	0.00088294	0.993462	12.4743	0.0250367	0.809961	5.59294	0.0110538	0.471003	0.574003	0.191805	4.76713
chr2L	12690000	12700000	-0.0234429	0.732638	12.6031	0.24297	0.0126824	6.38561	0.0068463	0.471003	-1.53041	0.03034	-0.73025
chr2L	12700000	12710000	-0.0183258	0.739477	12.5544	0.271785	0.0106365	6.44248	0.000624901	0.471003	-0.66885	0.260019	1.79565
chr2L	12710000	12720000	-0.0386558	0.589264	12.6085	0.190316	0.0244184	6.10361	-0.00457872	0.471003	1.1404	0.036025	5.39084
chr2L	12720000	12730000	-0.0571106	0.299865	12.5432	0.0985435	0.216908	6.06367	-0.0141175	0.471003	1.07097	0.045735	5.66797
chr2L	12730000	12740000	0.380738	2.42e-08	12.6268	-0.502101	4.49e-08	6.33507	-0.0349273	0.254592	-0.743701	0.089347	5.175
chr2L	12740000	12750000	0.173065	0.000251007	12.5004	-0.447562	1.4e-07	6.04524	-0.0381924	0.192055	-0.251973	0.544079	5.89026
chr2L	12750000	12760000	-0.0762833	0.142257	12.3694	-0.000334926	1	5.48021	-0.0426315	0.162408	0	1	-4.80255
chr2L	12760000	12770000	-0.0392187	0.479185	12.3498	0.0168663	0.878308	5.47418	-0.0426315	0.162408	-2.71155	0.592614	-4.56953
chr2L	12770000	12780000	-0.0740851	0.215244	12.261	-0.0278403	0.929293	5.2232	-0.0426315	0.162408	0	-1	0
chr2L	12780000	12790000	0.676582	2.96e-09	12.0193	-1.21428	2.16e-19	5.60274	-0.0426315	0.162408	0.826096	0.095372	6.49349
chr2L	12790000	12800000	0.371242	7.39e-15	12.4685	-0.428367	1.73e-07	6.05165	-0.0369633	0.246266	-0.654163	0.129548	5.03109
chr2L	12800000	12810000	-0.0892295	0.167084	12.1863	0.132354	0.120068	5.75174	-0.0342634	0.302458	1.86022	0.042604	-2.9475
chr2L	12810000	12820000	-0.00491856	0.95021	12.1434	0.0435031	0.632461	5.65589	-0.0322072	0.330008	1.19402	0.032336	7.76525
chr2L	12820000	12830000	-0.13103	0.0508516	12.1842	0.380414	0.00225812	7.05095	-0.0306221	0.332075	1.19402	0.032336	7.76525
chr2L	12830000	12840000	-0.0231459	0.761732	12.0408	0.269672	0.000966439	6.15341	-0.0301768	0.350633	0	-1	0
chr2L	12840000	12850000	0.00613625	0.929693	12.1488	0.351354	0.00317022	6.74593	-0.0288506	0.350633	1.27165	0.184923	-2.45429
chr2L	12850000	12860000	0.084349	0.239721	12.1435	0.187554	0.0686959	6.39318	-0.0266494	0.350633	0	-1	0
chr2L	12860000	12870000	-0.0189085	0.737688	12.3807	-0.0266451	0.761355	6.11323	-0.0266494	0.349569	-0.186719	0.693809	3.51228
chr2L	12870000	12880000	-0.0149649	0.830115	12.1182	0.117496	0.174307	5.83518	-0.025717	0.390273	1.22449	0.119426	-1.27207
chr2L	12880000	12890000	-0.0687927	0.314574	12.1483	-0.011142	0.92168	5.54193	-0.0228811	0.421827	0	-1	0
chr2L	12890000	12900000	0.100698	0.0683207	12.3741	-0.0109582	0.905795	6.15314	-0.0228811	0.421827	-0.195969	0.678707	3.51535
chr2L	12900000	12910000	0.0121793	0.85971	12.193	0.122129	0.247849	5.51223	-0.0175716	0.515283	0	-1	0
chr2L	12910000	12920000	0.0671467	0.24487	12.2988	0.0730768	0.421145	5.82447	-0.00954985	0.763721	1.11337	0.243847	-1.63364
chr2L	12920000	12930000	0.0400176	0.558837	12.266	-0.106585	0.379494	5.48954	-0.0115079	0.699067	1.11337	0.243847	-1.63364
chr2L	12930000	12940000	0.398639	5.95e-07	12.0467	-0.987172	6.72e-20	5.63276	-0.00559907	0.84464	-0.755382	0.253696	1.43616
chr2L	12940000	12950000	0.132787	0.0251556	12.261	-0.0584237	0.578397	5.60955	-0.00554996	0.84464	-0.625726	0.286866	1.42061
chr2L	12950000	12960000	-0.0845791	0.149498	12.3329	0.0428633	0.700718	5.47612	-0.00554996	0.84464	0	-1	0
chr2L	12960000	12970000	-0.0381627	0.455044	12.4931	0.227393	0.00803818	5.74186	-0.00554996	0.84464	2.44765	0.029662	-3.12138
chr2L	12970000	12980000	-0.0198438	0.714109	12.4813	0.178032	0.0428558	6.33445	-0.00554996	0.84464	0.144297	0.737689	6.59832
chr2L	12980000	12990000	-0.0606681	0.205591	12.4882	0.107449	0.217572	5.7082	-0.00808015	0.772238	0.165145	0.798741	0.225097
chr2L	12990000	13000000	-0.0695012	0.168119	12.5136	0.0314326	0.713494	5.68653	-0.00939178	0.717944	0.528219	0.219954	4.53768
chr2L	13000000	13010000	-0.105712	0.102099	12.6015	0.136421	0.0928104	6.19288	-0.0148599	0.559317	-1.78279	0.019893	1.66567
chr2L	13010000	13020000	-0.212334	0.00524584	12.6393	0.263605	0.00350713	6.35531	-0.0177804	0.503316	0.629606	0.188487	4.3394
chr2L	13020000	13030000	-0.0428062	0.539498	12.6571	0.185244	0.0324027	5.90864	-0.0181877	0.503316	0.629606	0.188487	4.3394
chr2L	13030000	13040000	-0.114678	0.0919933	12.6406	0.0167221	0.847917	5.71543	-0.0226404	0.396957	-0.257898	0.583027	7.02305
chr2L	13040000	13050000	-0.0399352	0.522983	12.5266	0.253303	0.00182415	6.29369	-0.0226404	0.396957	-0.257898	0.583027	7.02305
chr2L	13050000	13060000	-0.046692	0.421474	12.5704	-0.129258	0.200466	5.59167	-0.0226404	0.396957	-0.257898	0.583027	7.02305
chr2L	13060000	13070000	-0.116492	0.0142618	12.4953	0.230396	0.0481757	6.69839	-0.0217627	0.340532	-0.257898	0.583027	7.02305
chr2L	13070000	13080000	-0.0506985	0.356922	12.3506	0.162351	0.0699015	6.33649	-0.016953	0.451742	0	-1	0
chr2L	13080000	13090000	-0.0666918	0.184592	12.4539	0.14512	0.100149	5.817	-0.0165456	0.558102	-0.725188	0.855846	-3.80282
chr2L	13090000	13100000	-0.093312	0.139273	12.3882	0.295185	0.000273698	6.1566	-0.00730316	0.577377	2.34713	0.304321	-4.11297
chr2L	13100000	13110000	-0.116746	0.0352889	12.3084	0.161025	0.0580048	5.89028	0.00351009	0.632398	-0.502602	1	-4.04598
chr2L	13110000	13120000	-0.0256094	0.690658	12.2709	0.192918	0.0266988	5.82147	0.00351009	0.632398	1.4802	0.212425	-3.24821
chr2L	13120000	13130000	-0.147631	0.00824742	12.4091	0.144769	0.0845177	6.3128	0.00351009	0.613123	1.4802	0.212425	-3.24821
chr2L	13130000	13140000	-0.0899174	0.0548691	12.5041	0.219311	0.0055837	6.24212	0.00351009	0.672221	0.300965	0.825099	-2.01803
chr2L	13140000	13150000	-0.0395633	0.591137	12.2818	0.157117	0.0529713	6.02765	0.00351009	0.708344	0.36909	1	-4.56144
chr2L	13150000	13160000	0.0496868	0.374068	12.3744	0.142974	0.0963519	6.10162	0.00167551	0.705562	1.09988	0.458252	-3.4514
chr2L	13160000	13170000	0.0387178	0.571081	12.6431	0.250606	0.0188728	6.44496	-0.00416978	0.705562	0.905568	0.049045	6.55561
chr2L	13170000	13180000	-0.108949	0.102705	12.6028	0.206639	0.0128859	6.32384	-0.00416978	0.744613	0.905568	0.049045	6.55561
chr2L	13180000	13190000	-0.116385	0.106782	12.6295	0.267274	0.000932893	6.26419	-0.00814652	0.785303	0.58201	0.28715	2.22584
chr2L	13190000	13200000	-0.106983	0.0586768	12.5436	0.19043	0.0180304	6.2508	-0.0125581	0.652045	0.550352	0.209705	5.11862
chr2L	13200000	13210000	-0.108374	0.0400501	12.5519	0.0838599	0.296805	6.26556	-0.0125581	0.651374	0.550352	0.209705	5.11862
chr2L	13210000	13220000	-0.199367	0.00397106	12.6069	-0.0155836	0.862979	6.09988	-0.00814652	0.651374	-1.25074	0.242445	-2.68772
chr2L	13220000	13230000	-0.0888596	0.0712498	12.5419	0.17057	0.0444852	6.03742	-0.00251468	0.651374	0.542013	0.340641	1.78351
chr2L	13230000	13240000	-0.0253063	0.654121	12.3705	0.1353	0.118517	5.73738	0.00187881	0.55886	-2.08749	0.10415	-2.51013
chr2L	13240000	13250000	0.000148133	1	12.4698	0.0360625	0.672242	5.90076	0.00509903	0.55886	-2.56421	0.006864	0.353557
chr2L	13250000	13260000	0.0285246	0.596211	12.4218	0.105778	0.222755	5.80754	0.00898913	0.55886	-2.56421	0.006864	0.353557
chr2L	13260000	13270000	-0.0144141	0.798809	12.4482	0.111968	0.194273	5.80454	0.0120834	0.55886	-1.95675	0.090645	-1.75149
chr2L	13270000	13280000	-0.0413464	0.404931	12.5161	0.341276	3.41e-05	6.16459	0.0158317	0.49187	-1.67553	0.285643	-3.17927
chr2L	13280000	13290000	-0.0427026	0.408306	12.4744	0.101248	0.226721	5.9889	0.020932	0.36345	1.18803	0.063062	2.01324
chr2L	13290000	13300000	-0.0400442	0.399299	12.5354	0.195139	0.0650582	6.42848	0.0279847	0.235504	-0.257118	0.708683	0.195546
chr2L	13300000	13310000	-0.126513	0.0112148	12.4901	0.131195	0.166222	5.6426	0.0296759	0.207421	-0.859947	0.415416	-2.06982
chr2L	13310000	13320000	-0.0820718	0.0986392	12.4331	0.022719	0.913621	5.30602	0.0297863	0.20741	-0.490553	0.497958	0.079764
chr2L	13320000	13330000	-0.108933	0.0385508	12.472	0.0204961	0.913499	5.34139	0.0332592	0.174634	-0.490553	0.497958	0.079764
chr2L	13330000	13340000	-0.0293754	0.605433	12.3892	0.0799604	0.371142	5.66011	0.0356599	0.155347	-0.490553	0.497958	0.079764
chr2L	13340000	13350000	-0.0113907	0.854219	12.3583	-0.032219	0.771253	5.50684	0.0356599	0.155347	6.7871	0.00138	-2.6215
chr2L	13350000	13360000	0.0405677	0.426389	12.5159	0.111506	0.222513	5.63811	0.0356599	0.155347	-2.97213	0.0125	-0.998732
chr2L	13360000	13370000	-0.0488337	0.347705	12.4741	0.128312	0.134526	6.25318	0.0332592	0.174634	0.898594	0.066315	4.46445
chr2L	13370000	13380000	-0.17374	0.0084237	12.5674	0.223371	0.0481264	6.61601	0.0311469	0.210769	0.898594	0.066315	4.46445
chr2L	13380000	13390000	0.00688245	0.908337	12.5282	0.112756	0.168002	6.13961	0.0246452	0.35399	1.14763	0.046479	3.85047
chr2L	13390000	13400000	-0.131947	0.0221329	12.5814	0.263801	0.0161973	6.46541	0.021378	0.472857	0.429101	0.303899	8.81173
chr2L	13400000	13410000	0.288967	4.95e-06	12.602	-0.57124	5.33e-11	6.18979	0.00622995	0.508087	-0.265411	0.522478	5.91598
chr2L	13410000	13420000	0.117728	0.0312947	12.3351	-0.0569655	0.558261	5.61343	-0.0107573	0.508087	6.14714	0.000111	1.93911
chr2L	13420000	13430000	0.0170359	0.770172	12.3866	-0.110719	0.704274	5.19707	-0.0131405	0.541584	-3.23768	0.003409	-1.83003
chr2L	13430000	13440000	0.0145947	0.786471	12.4585	0.106914	0.219381	5.71423	-0.0138645	0.602491	-1.80036	0.119191	-1.89783
chr2L	13440000	13450000	-0.17559	0.000596858	12.5485	0.164844	0.0433189	6.0097	-0.0138645	0.656655	-4.93308	0.046261	-3.83484
chr2L	13450000	13460000	0.618953	7.66e-17	12.2421	-1.22194	6.63e-29	5.82932	-0.0138645	0.656655	0.746118	0.120547	6.76544
chr2L	13460000	13470000	-0.0704644	0.144667	12.4747	0.0859965	0.337835	5.67618	-0.0131405	0.649309	-1.06602	0.104129	2.01177
chr2L	13470000	13480000	0.0116898	0.827081	12.4834	-0.0366463	0.888034	5.29158	-0.0107573	0.649309	-1.06602	0.104129	2.01177
chr2L	13480000	13490000	0.110037	0.0408605	12.4412	-0.208519	0.431208	5.25296	0.00204047	0.595145	-1.06602	0.104129	2.01177
chr2L	13490000	13500000	-0.0540123	0.249389	12.4848	-0.0715093	0.519013	5.49471	0.0131415	0.53899	-1.06602	0.104129	2.01177
chr2L	13500000	13510000	-0.00817521	0.898887	12.4233	0.1038	0.244676	5.71081	0.0131415	0.585862	-1.06602	0.104129	2.01177
chr2L	13510000	13520000	0.0726035	0.1272	12.4982	0.19762	0.0134435	6.17434	0.0131415	0.649309	0.937001	0.166218	1.51863
chr2L	13520000	13530000	0.400687	1.7e-07	12.3966	-1.23801	4.76e-31	6.03723	0.0131415	0.585862	-1.14333	0.034802	2.49765
chr2L	13530000	13540000	0.125562	0.0283992	12.3362	0.0187341	0.888567	5.43132	0.0131415	0.538196	-0.610573	0.158557	6.08812
chr2L	13540000	13550000	-0.152455	0.00430349	12.5064	0.209531	0.0705954	6.63489	0.00950375	0.538196	0.722487	0.244794	1.37119
chr2L	13550000	13560000	0.0854805	0.193831	12.1861	-0.181312	0.0743703	5.90985	0.0025536	0.484706	0.724902	0.126359	5.44727
chr2L	13560000	13570000	0.484906	1.43e-12	12.7064	-0.754811	1.28e-20	6.27531	-0.00191468	0.484706	-0.515033	0.226037	5.52185
chr2L	13570000	13580000	-0.0555254	0.308622	12.3635	0.0383175	0.654771	6.01897	-0.00621441	0.594351	0.22059	0.594888	6.65171
chr2L	13580000	13590000	0.0223817	0.698451	12.3049	-0.176603	0.510252	5.24727	-0.010594	0.594351	0.983804	0.09086	2.42438
chr2L	13590000	13600000	0.077478	0.13699	12.4346	-0.0512228	0.588721	5.79086	-0.0137686	0.594351	0.733835	0.20213	2.61747
chr2L	13600000	13610000	0.0482768	0.380362	12.4085	-0.134202	0.516767	5.34297	-0.0137686	0.594351	0.733835	0.20213	2.61747
chr2L	13610000	13620000	-0.0321702	0.576138	12.4004	0.109409	0.208187	5.74696	-0.0137686	0.594351	0.35967	0.397088	5.89587
chr2L	13620000	13630000	-0.00877625	0.877188	12.4448	0.0281614	0.750236	5.75631	-0.010594	0.594351	0.35967	0.397088	5.89587
chr2L	13630000	13640000	-0.0169432	0.740938	12.4748	0.149964	0.080144	5.75115	-0.00918745	0.58516	0.952638	0.05277	6.74443
chr2L	13640000	13650000	-0.00658737	0.933293	12.0363	0.0200865	0.867004	5.45976	-0.00918745	0.58516	0.275497	0.519937	4.73017
chr2L	13650000	13660000	-0.110314	0.138257	11.4886	0.0433229	0.884801	4.71898	-0.00528012	0.675367	0	-1	0
chr2L	13660000	13670000	-0.0138263	0.851444	11.9916	0.307712	0.000256829	6.27715	-0.00152914	0.709887	-0.282734	0.609497	4.16282
chr2L	13670000	13680000	0.0131216	0.830212	12.3702	0.0873289	0.401655	5.54568	-0.00152914	0.648281	-1.73758	0.128411	-0.798206
chr2L	13680000	13690000	-0.0032091	0.96327	12.3756	-0.0661866	0.760517	5.3383	-0.00152914	0.667685	-1.73758	0.128411	-0.798206
chr2L	13690000	13700000	-0.21001	2.5e-05	12.4629	0.0579477	0.521757	5.64184	-0.00152914	0.667685	-1.73758	0.128411	-0.798206
chr2L	13700000	13710000	-0.143373	0.00449346	12.4828	0.0938843	0.293327	5.75292	-0.00152914	0.607249	0.278792	0.853889	-2.15767
chr2L	13710000	13720000	0.0314552	0.612134	12.3214	-0.0641033	0.70563	5.3931	-0.00761288	0.558074	-1.59365	0.253242	-2.38882
chr2L	13720000	13730000	-0.124674	0.0169723	12.4272	0.00907779	0.92916	5.58384	-0.0141376	0.557138	0.0608792	1	-2.87674
chr2L	13730000	13740000	-0.103905	0.0509012	12.4082	0.0222237	0.830884	5.57318	-0.0201253	0.447124	-7.67041	1e-05	3.39324
chr2L	13740000	13750000	-0.0948993	0.102677	12.4064	0.0478642	0.575029	5.75158	-0.0263703	0.296037	-3.04981	0.402451	-4.49573
chr2L	13750000	13760000	-0.134188	0.00510713	12.4559	0.048775	0.568863	5.72174	-0.0378742	0.174403	0.278431	0.50811	5.76375
chr2L	13760000	13770000	0.103632	0.0748652	12.284	-0.406391	0.0200785	5.38458	-0.0511755	0.0530227	-0.528591	0.260868	3.37843
chr2L	13770000	13780000	-0.041662	0.373862	12.4745	0.223751	0.0448512	6.56	-0.0523156	0.0495755	-0.568684	0.380229	0.902711
chr2L	13780000	13790000	-0.0535589	0.305605	12.5582	0.194686	0.0323442	6.36574	-0.0553333	0.0396412	0.730384	0.141217	3.82994
chr2L	13790000	13800000	-0.185017	0.00012394	12.524	0.153142	0.0706201	6.17025	-0.0553333	0.0396412	1.5312	0.486463	-3.81156
chr2L	13800000	13810000	-0.0440999	0.392651	12.4663	0.215709	0.00865154	5.99552	-0.0535823	0.0463051	-0.73267	0.217849	2.48528
chr2L	13810000	13820000	-0.21176	0.00786902	12.6004	0.257012	0.00136373	6.21217	-0.0535823	0.0463051	0.99889	0.088634	2.3318
chr2L	13820000	13830000	-0.211951	0.0044347	12.71	0.27337	0.01099	6.4533	-0.0535823	0.0463051	0.48629	0.291775	3.6496
chr2L	13830000	13840000	-0.202105	0.000658819	12.5604	0.262996	0.0242409	6.69433	-0.0451316	0.0867671	0.733896	0.245412	2.00594
chr2L	13840000	13850000	-0.0286062	0.610048	12.4996	0.073395	0.397024	5.98983	-0.0316525	0.206654	-1.30861	0.187988	3.55229
chr2L	13850000	13860000	0.315804	7.39e-05	12.3112	-1.68953	1.15e-54	5.95445	-0.0184483	0.375992	-0.327074	0.644597	0.135836
chr2L	13860000	13870000	0.0153796	0.796178	12.4682	-0.286223	0.00103561	5.8975	-0.00685224	0.496911	0.450301	0.36787	3.62476
chr2L	13870000	13880000	-0.0454717	0.36357	12.4981	0.0683783	0.441869	5.85775	0.00341922	0.560673	0.575488	0.180728	6.00836
chr2L	13880000	13890000	-0.0363518	0.53728	12.4517	-0.0123313	0.903981	5.62058	0.00341922	0.620634	0.575488	0.180728	6.00836
chr2L	13890000	13900000	-0.18203	0.00171908	12.5864	0.194655	0.0153676	6.10576	0.00341922	0.659146	0.575488	0.180728	6.00836
chr2L	13900000	13910000	-0.0464374	0.354524	12.538	0.191271	0.0190695	6.30564	-0.000675531	0.668475	0.575488	0.180728	6.00836
chr2L	13910000	13920000	-0.119909	0.0337448	12.476	0.0786896	0.364555	5.84192	-0.000675531	0.716425	-1.23309	0.203611	-3.04421
chr2L	13920000	13930000	-0.0363502	0.45039	12.4657	0.198981	0.0149959	6.02614	-0.000675531	0.716425	-4.81926	0.000305	2.53427
chr2L	13930000	13940000	0.0680698	0.329301	12.2579	0.044766	0.736715	5.43153	-0.00357165	0.70847	-1.94933	0.000403	3.83206
chr2L	13940000	13950000	-0.190065	6.77e-05	12.4962	0.231824	0.006245	5.8269	-0.00726584	0.659146	-2.25145	0.001507	3.0122
chr2L	13950000	13960000	-0.207282	0.000565359	12.5983	0.168219	0.0399841	6.30911	-0.0100062	0.659146	-0.327046	0.677115	-1.63131
chr2L	13960000	13970000	-0.107895	0.0509705	12.4879	0.224793	0.0075386	5.98711	-0.0118457	0.653539	-3.11477	0.002242	-0.600116
chr2L	13970000	13980000	0.0378401	0.533275	12.285	0.0678785	0.451423	5.64683	-0.0177914	0.532521	-1.84233	0.04234	0.116609
chr2L	13980000	13990000	-0.10704	0.0374948	12.5381	0.146195	0.105703	5.74934	-0.022743	0.388248	1.21092	0.028105	2.38487
chr2L	13990000	14000000	-0.0410002	0.409345	12.4253	0.0228213	0.834475	5.49965	-0.022743	0.38417	3.80559	0.012246	-2.88245
chr2L	14000000	14010000	-0.0757304	0.184789	12.3916	0.182072	0.032867	5.68477	-0.0229162	0.357201	1.21092	0.028105	2.38487
chr2L	14010000	14020000	-0.137346	0.0042358	12.4919	0.0384571	0.651024	5.69642	-0.0229162	0.357201	1.69057	0.10375	1.42259
chr2L	14020000	14030000	-0.0860177	0.243859	12.6337	0.36698	0.00233808	6.76718	-0.0229162	0.357201	-1.99441	0.033699	-1.03307
chr2L	14030000	14040000	-0.120815	0.0237052	12.4053	-0.0780661	0.488779	5.47978	-0.0220804	0.38417	-1.99441	0.033699	-1.03307
chr2L	14040000	14050000	-0.00211335	0.975902	12.5097	0.0758777	0.448825	5.59119	-0.0203131	0.414406	-2.78512	0.015509	-0.909017
chr2L	14050000	14060000	-0.0651267	0.170083	12.4825	0.06692	0.568225	5.47816	-0.0154712	0.539502	0	-1	0
chr2L	14060000	14070000	-0.0337219	0.474996	12.4965	0.105158	0.306352	5.5544	-0.0154712	0.535424	-3.06699	0.007621	1.2024
chr2L	14070000	14080000	0.0131153	0.795033	12.4647	0.0340451	0.804128	5.42346	-0.0154712	0.538084	-3.06699	0.007621	1.2024
chr2L	14080000	14090000	0.0538681	0.345924	12.3245	-0.112937	0.578218	5.35463	-0.008641	0.708886	-3.06699	0.007621	1.2024
chr2L	14090000	14100000	0.179488	0.0109447	12.2379	-0.0907724	0.726861	5.27836	-0.00819694	0.708886	-3.06699	0.007621	1.2024
chr2L	14100000	14110000	-0.0653743	0.157029	12.5022	0.197718	0.0212345	5.84507	-0.00817928	0.709875	-1.94082	0.118124	-0.982745
chr2L	14110000	14120000	-0.130426	0.0199392	12.4471	0.0698831	0.51871	5.50243	-0.0113178	0.661509	-1.83175	0.2646	-2.87279
chr2L	14120000	14130000	-0.107431	0.0529437	12.4897	0.0350165	0.724226	5.5541	-0.0117795	0.658366	0	-1	0
chr2L	14130000	14140000	-0.13372	0.0068663	12.4607	0.0952892	0.314026	5.60072	-0.0159234	0.535931	-1.80024	0.043839	0.42662
chr2L	14140000	14150000	-0.0218858	0.675624	12.477	0.146094	0.104428	5.63895	-0.0234085	0.380042	-1.80024	0.043839	0.42662
chr2L	14150000	14160000	-0.0730727	0.139336	12.5375	0.136601	0.126099	5.66152	-0.027907	0.315469	-1.80024	0.043839	0.42662
chr2L	14160000	14170000	-0.0361944	0.50127	12.5615	0.0403625	0.637345	5.85429	-0.0282972	0.30943	-1.80024	0.043839	0.42662
chr2L	14170000	14180000	-0.0218079	0.696365	12.5055	0.0720071	0.420879	5.76903	-0.0299834	0.260347	-0.1522	0.796239	2.50965
chr2L	14180000	14190000	-0.0395831	0.481835	12.4753	0.175378	0.0334544	6.01218	-0.0329153	0.223295	0.959422	0.023007	7.74043
chr2L	14190000	14200000	-0.115417	0.046915	12.4925	0.0965579	0.287891	5.84712	-0.0379639	0.184112	0.959422	0.023007	7.74043
chr2L	14200000	14210000	-0.0418322	0.414775	12.5265	0.0678737	0.42596	6.0907	-0.042858	0.138611	0.959422	0.023007	7.74043
chr2L	14210000	14220000	-0.00394707	0.947993	12.4744	-0.0188551	0.832255	5.70732	-0.0450753	0.102682	0.959422	0.023007	7.74043
chr2L	14220000	14230000	0.0119159	0.828511	12.3636	0.0729754	0.40378	6.27102	-0.0428804	0.138611	0.959422	0.023007	7.74043
chr2L	14230000	14240000	-0.00602691	0.933552	12.2905	-0.1232	0.198209	5.84608	-0.0428804	0.107773	0.959422	0.023007	7.74043
chr2L	14240000	14250000	-0.0103982	0.867252	12.304	0.0330811	0.751104	5.61827	-0.0428804	0.107773	1.70752	0.503363	-4.31672
chr2L	14250000	14260000	-0.0103873	0.866319	12.3466	0.0409177	0.645789	5.84246	-0.0428804	0.107773	0	-1	0
chr2L	14260000	14270000	-0.0396627	0.41296	12.4809	0.195649	0.0163807	6.09775	-0.0427729	0.107773	1.25373	0.01279	2.91747
chr2L	14270000	14280000	-0.0134771	0.804448	12.4622	0.048648	0.598872	5.93838	-0.0400827	0.113771	1.12201	0.016667	3.71024
chr2L	14280000	14290000	-0.0326657	0.529062	12.4821	0.0245233	0.777093	5.94805	-0.0330037	0.21126	1.12201	0.016667	3.71024
chr2L	14290000	14300000	-0.0613466	0.219459	12.5303	0.195719	0.0680704	6.40673	-0.0214378	0.396994	1.17042	0.067613	0.551707
chr2L	14300000	14310000	-0.0261174	0.626584	12.5095	0.145299	0.0735461	6.14972	-0.0165554	0.492658	0.245309	0.582425	5.61453
chr2L	14310000	14320000	-0.12299	0.0124857	12.5398	-0.0214338	0.813646	5.77548	-0.0163832	0.496565	0.245309	0.582425	5.61453
chr2L	14320000	14330000	-0.147913	0.00733556	12.5819	0.184005	0.0279899	6.10166	-0.0137883	0.510139	0.245309	0.582425	5.61453
chr2L	14330000	14340000	-0.0309427	0.553115	12.5279	0.0993799	0.234037	6.10089	-0.00866408	0.510139	0.434721	0.445235	1.74562
chr2L	14340000	14350000	-0.0269136	0.649205	12.5976	0.091155	0.308339	5.88579	-0.00300871	0.510139	-3.00982	0.002889	1.65048
chr2L	14350000	14360000	-0.0828865	0.186432	12.5926	0.253684	0.00954131	6.38254	0.00164294	0.509196	-2.6545	0.003539	1.72986
chr2L	14360000	14370000	-0.131463	0.0162275	12.5817	0.310021	0.00600342	6.59208	0.0101129	0.492658	0.297066	0.485701	5.29376
chr2L	14370000	14380000	-0.0126087	0.834853	12.5227	-0.0275639	0.755864	5.68143	0.0254185	0.330927	0.450418	0.537325	-0.105533
chr2L	14380000	14390000	-0.0424539	0.375162	12.4784	0.357732	0.00323876	6.81754	0.033959	0.15858	1.03535	0.186718	-1.02552
chr2L	14390000	14400000	-0.124213	0.0384988	12.4809	0.142946	0.0972742	5.91649	0.0370916	0.147704	0.640441	0.15321	6.7973
chr2L	14400000	14410000	0.0114796	0.829168	12.4375	0.086637	0.288452	6.18125	0.0375987	0.147704	0.640441	0.15321	6.7973
chr2L	14410000	14420000	-0.0872746	0.104849	12.4135	0.230884	0.00394108	6.17123	0.0417618	0.130453	0.823527	0.577524	-3.68619
chr2L	14420000	14430000	-0.107097	0.0234417	12.4937	0.25316	0.0238727	6.50281	0.0447804	0.109564	0.667885	0.33555	-0.118772
chr2L	14430000	14440000	-0.0521244	0.287799	12.4739	0.00594783	0.949213	5.90912	0.0470044	0.100316	0.196212	1	-3.90074
chr2L	14440000	14450000	-0.124133	0.0087107	12.5239	0.116375	0.174728	5.97972	0.0480885	0.0927705	-1.14225	0.536205	-3.87081
chr2L	14450000	14460000	-0.092111	0.0774459	12.5512	0.119337	0.136799	6.23328	0.0480885	0.0891585	1.72069	0.273864	-3.52792
chr2L	14460000	14470000	0.166916	0.00263646	12.4938	-0.167869	0.132066	6.43955	0.0480885	0.0891585	-1.72161	0.005561	0.973756
chr2L	14470000	14480000	-0.104399	0.0292143	12.5082	0.220213	0.00842831	6.31403	0.048603	0.0858963	0	-1	0
chr2L	14480000	14490000	-0.142091	0.00453375	12.54	0.156049	0.0578928	6.08531	0.0490823	0.0858963	-2.79319	0.062436	-3.85274
chr2L	14490000	14500000	-0.138713	0.0112272	12.5822	0.33241	0.00451702	6.69183	0.0490823	0.0858963	0.899582	0.072238	6.60959
chr2L	14500000	14510000	-0.117414	0.0313218	12.5397	0.0991343	0.381404	6.51889	0.0500997	0.0828546	-0.0983631	1	-3.13297
chr2L	14510000	14520000	-0.311906	6.59e-08	12.5912	0.358774	0.00348578	6.95394	0.0500997	0.0828546	-0.0475287	1	-3.86207
chr2L	14520000	14530000	-0.0647646	0.206725	12.452	0.0968822	0.23347	6.16205	0.0500997	0.0828546	0.766096	1	-4.50358
chr2L	14530000	14540000	-0.217814	0.000478174	12.5892	0.186079	0.0993637	6.58585	0.0475475	0.0871426	0.221716	1	-4.01558
chr2L	14540000	14550000	-0.150258	0.0248228	12.6128	0.251806	0.00694017	6.37692	0.043669	0.101599	0.606921	0.691338	-2.50162
chr2L	14550000	14560000	-0.190781	4.85e-05	12.5255	0.322426	0.00966352	6.95512	0.043669	0.113424	-1.13449	0.590968	-4.1243
chr2L	14560000	14570000	-0.25115	2.69e-05	12.5417	0.269285	0.0185379	6.63368	0.0430201	0.134879	1.88076	0.317626	-3.91844
chr2L	14570000	14580000	-0.211153	0.000404018	12.5506	0.336361	0.00378952	6.64875	0.0341123	0.235764	1.93786	1	-4.68255
chr2L	14580000	14590000	-0.106724	0.0245294	12.4556	0.181895	0.0248669	6.23103	0.0237967	0.318256	-1.11547	0.7035	-4.37855
chr2L	14590000	14600000	-0.133944	0.0317113	12.5514	0.15102	0.178013	6.58813	0.0237468	0.322598	1.05851	0.139242	3.4228
chr2L	14600000	14610000	-0.121118	0.0860523	12.6038	0.217703	0.0447632	6.4804	0.0218248	0.35185	1.05851	0.139242	3.4228
chr2L	14610000	14620000	-0.217366	2.03e-06	12.5062	0.0533609	0.538496	5.85213	0.0218248	0.35185	-1.61665	0.029725	4.43752
chr2L	14620000	14630000	-0.151235	0.00375372	12.446	0.10325	0.207579	6.01246	0.019286	0.493927	0	-1	0
chr2L	14630000	14640000	-0.0989889	0.0498786	12.4559	0.133161	0.123199	5.93142	0.0162813	0.609164	0.0354495	0.931873	7.60586
chr2L	14640000	14650000	0.355159	0.000249419	12.2701	-1.29604	1.38e-39	6.24418	0.0162813	0.609164	-0.17776	0.733658	2.81576
chr2L	14650000	14660000	0.0219842	0.705909	12.3772	0.113537	0.332454	6.57203	0.0162813	0.609164	0.354816	0.472207	3.57849
chr2L	14660000	14670000	-0.024058	0.638873	12.49	-0.112963	0.179348	6.05916	0.021208	0.510649	0.0354495	0.931873	7.60586
chr2L	14670000	14680000	-0.0662775	0.224779	12.3564	0.0223871	0.822928	5.90325	0.0292377	0.368572	0.0354495	0.931873	7.60586
chr2L	14680000	14690000	-0.0861387	0.105476	12.4616	0.0610907	0.454728	6.08791	0.0339198	0.313942	0.0354495	0.931873	7.60586
chr2L	14690000	14700000	0.0453077	0.427735	12.2867	-0.103625	0.279009	5.83813	0.0339198	0.357393	0.96893	1	-4.74255
chr2L	14700000	14710000	0.0157469	0.775822	12.423	0.0831714	0.359405	5.80433	0.0371005	0.294142	0	1	-4.80255
chr2L	14710000	14720000	-0.00933927	0.874179	12.3263	0.0647865	0.451134	5.98116	0.03648	0.357393	1.28814	0.032996	3.27685
chr2L	14720000	14730000	0.00375774	0.962762	12.1723	-0.0480185	0.668015	5.4832	0.03648	0.357393	0.784144	0.62151	-3.69553
chr2L	14730000	14740000	-0.0139786	0.856048	11.7835	0.0164907	0.944521	5.18758	0.03648	0.357393	-2.66405	0.004712	3.16249
chr2L	14740000	14750000	0.102736	0.200857	11.826	0.0419728	0.877449	5.14947	0.0339972	0.259373	-2.64149	0.004941	3.16795
chr2L	14750000	14760000	0.0432575	0.592021	12.062	-0.0160822	0.920907	5.40997	0.0229455	0.203227	0	1	-4.80255
chr2L	14760000	14770000	0.0273209	0.684202	11.9973	0.0915825	0.318521	5.72532	0.0143355	0.203227	1.06997	0.388873	-1.40696
chr2L	14770000	14780000	0.121851	0.111055	11.9235	-0.120001	0.479755	5.38731	-0.00122014	0.203227	-0.406812	0.810338	-2.775
chr2L	14780000	14790000	0.0510315	0.501196	11.892	0.00411544	0.978499	5.33274	-0.0236441	0.198901	-2.09797	0.242327	-4.12086
chr2L	14790000	14800000	0.122536	0.118674	11.8589	-0.192839	0.512103	5.17973	-0.0435948	0.149509	-0.599737	0.795864	-4.21923
chr2L	14800000	14810000	0.378841	3.97e-05	12.106	-1.20579	9.42e-38	5.85171	-0.0549655	0.0968562	-1.49974	0.013953	5.91134
chr2L	14810000	14820000	-0.0265876	0.697146	11.9722	-0.0195461	0.898029	5.42106	-0.0575343	0.0707794	1.7404	0.207523	-2.70178
chr2L	14820000	14830000	0.0237734	0.766884	11.9033	-0.0404788	0.862725	5.31831	-0.0575343	0.0707794	0	-1	0
chr2L	14830000	14840000	-0.000606938	1	11.8802	-0.0444628	0.850979	5.31261	-0.0575343	0.0707794	0	-1	0
chr2L	14840000	14850000	0.0691361	0.355135	11.8437	0.075059	0.517468	5.45931	-0.0575343	0.0707794	-0.547198	0.464573	2.12057
chr2L	14850000	14860000	0.078909	0.310201	11.8318	-0.0755538	0.786013	5.2348	-0.0549655	0.0968562	-0.547198	0.464573	2.12057
chr2L	14860000	14870000	0.0122176	0.865585	11.8858	-0.166507	0.525238	5.25395	-0.0575343	0.0968562	0	-1	0
chr2L	14870000	14880000	0.0195169	0.7781	11.9068	0.0429573	0.676502	5.51565	-0.0589788	0.0968562	1.4159	0.283257	-2.19542
chr2L	14880000	14890000	-0.116784	0.0957694	11.8977	-0.032908	0.846376	5.39439	-0.0556619	0.133393	1.4159	0.283257	-2.19542
chr2L	14890000	14900000	-0.00712659	0.942186	11.8707	-0.159983	0.337551	5.39003	-0.0478979	0.147122	-0.404202	0.533372	0.327826
chr2L	14900000	14910000	-0.0156878	0.838522	11.7978	-0.019613	0.881753	5.44292	-0.0427033	0.170409	-2.66613	0.006758	-0.975229
chr2L	14910000	14920000	-0.0816432	0.220845	11.9793	0.147459	0.0872692	5.78287	-0.0383373	0.202837	-2.66613	0.006758	-0.975229
chr2L	14920000	14930000	-0.125991	0.0594016	12.0815	0.192557	0.0396044	5.81912	-0.0383373	0.202837	-2.66613	0.006758	-0.975229
chr2L	14930000	14940000	-0.106975	0.101156	12.0884	-0.0246559	0.830038	5.48746	-0.0383373	0.202837	-2.06813	0.056012	0.278169
chr2L	14940000	14950000	0.0696291	0.331326	12.0391	-0.0470533	0.779585	5.39119	-0.0173187	0.173746	-2.06813	0.056012	0.278169
chr2L	14950000	14960000	0.070889	0.282523	12.1472	-0.201834	0.518427	5.08853	0.00181117	0.153758	-2.06813	0.056012	0.278169
chr2L	14960000	14970000	0.0840177	0.243704	12.1569	-0.170637	0.563946	5.18142	0.00435568	0.153807	-2.06813	0.056012	0.278169
chr2L	14970000	14980000	0.0180089	0.78381	12.1433	0.00341852	0.975245	5.47801	0.00761221	0.178969	-2.06813	0.056012	0.278169
chr2L	14980000	14990000	0.208317	0.000458122	12.3529	-0.365766	0.000186299	5.93092	0.0203921	0.178969	-0.653307	0.246025	2.71214
chr2L	14990000	15000000	0.087331	0.152154	12.2138	0.0996966	0.295694	6.38257	0.0330378	0.18016	-0.662308	0.270079	2.67796
chr2L	15000000	15010000	-0.0675891	0.150752	12.4757	0.0433899	0.611684	5.9968	0.0330378	0.18016	0.924864	0.062546	3.69117
chr2L	15010000	15020000	-0.0299624	0.576099	12.477	0.0847833	0.354061	5.71145	0.0330378	0.18016	-2.66694	0.009778	-0.0993607
chr2L	15020000	15030000	0.0191539	0.755537	12.4584	-0.264388	0.0579394	5.42517	0.0330378	0.18016	-2.66694	0.009778	-0.0993607
chr2L	15030000	15040000	0.14387	0.00413641	12.4843	-0.0224254	0.799158	5.99973	0.0330378	0.18016	-2.66694	0.009778	-0.0993607
chr2L	15040000	15050000	-0.0499899	0.319719	12.5548	0.156825	0.0647148	5.98899	0.0278029	0.246355	0.923113	0.080279	4.48396
chr2L	15050000	15060000	0.00983166	0.842922	12.4985	0.101325	0.207964	6.2446	0.0123624	0.297525	1.57591	0.009924	5.75394
chr2L	15060000	15070000	-0.04425	0.533919	12.6555	0.0564334	0.484655	6.26594	-0.000454633	0.409599	1.57591	0.009924	5.75394
chr2L	15070000	15080000	-0.101138	0.046456	12.4652	0.100682	0.246817	5.78147	-0.00345511	0.463521	-2.29922	0.01476	-0.195351
chr2L	15080000	15090000	0.107766	0.0409543	12.4351	-0.096624	0.702138	5.27736	-0.00932694	0.463521	-2.29922	0.01476	-0.195351
chr2L	15090000	15100000	-0.017585	0.772956	12.4339	0.0511318	0.582762	5.62161	-0.0158485	0.463521	-2.29922	0.01476	-0.195351
chr2L	15100000	15110000	0.0131991	0.80443	12.4824	0.146109	0.0873988	5.74775	-0.0217679	0.463521	-0.841309	0.430798	-3.33268
chr2L	15110000	15120000	-0.115778	0.0363767	12.5612	0.229412	0.00894789	6.31834	-0.027163	0.351447	0.583539	0.169071	6.07065
chr2L	15120000	15130000	-0.0579553	0.410751	12.3897	0.0884731	0.399017	5.5923	-0.03203	0.27094	3.23961	0.315275	-4.47122
chr2L	15130000	15140000	-0.0194913	0.739655	12.3803	-0.0288095	0.790737	5.50454	-0.0389296	0.200217	-2.63274	0.556052	-4.58003
chr2L	15140000	15150000	-0.0888662	0.0856814	12.4467	0.0943998	0.26181	5.74085	-0.0411056	0.171208	0	-1	0
chr2L	15150000	15160000	-0.0763815	0.208413	12.2972	0.0870805	0.397913	5.53616	-0.0411056	0.171208	-1.80926	1	-4.69241
chr2L	15160000	15170000	-0.0918333	0.154131	12.2654	0.0274794	0.75133	5.67922	-0.0411056	0.171208	-1.30163	0.132552	-0.504937
chr2L	15170000	15180000	-0.03739	0.517168	12.3056	0.0445262	0.676498	5.4965	-0.0411056	0.171208	-1.30163	0.132552	-0.504937
chr2L	15180000	15190000	-0.00509575	0.946519	12.2449	0.0265309	0.803734	5.49506	-0.0411056	0.171208	-1.30163	0.132552	-0.504937
chr2L	15190000	15200000	-0.0166829	0.78464	12.2439	0.0524187	0.604127	5.54403	-0.0292182	0.326065	-1.30163	0.132552	-0.504937
chr2L	15200000	15210000	-0.0448017	0.514112	12.205	0.0370158	0.740436	5.50083	-0.0192513	0.326065	-1.30163	0.132552	-0.504937
chr2L	15210000	15220000	0.114502	0.0460549	12.3225	0.089735	0.315374	5.8636	-0.00974315	0.326065	-0.0842821	1	-3.44301
chr2L	15220000	15230000	-0.0236321	0.660159	12.4391	0.0549483	0.557227	5.61745	0.00210119	0.326065	1.81848	0.105362	1.28419
chr2L	15230000	15240000	-0.057435	0.286952	12.4897	0.149361	0.0814288	5.92293	0.00524805	0.326065	1.81848	0.105362	1.28419
chr2L	15240000	15250000	-0.0574202	0.282502	12.4418	0.209076	0.0136909	5.86949	0.0220029	0.311388	1.81848	0.105362	1.28419
chr2L	15250000	15260000	-0.113777	0.0206704	12.4374	0.122361	0.140179	6.10029	0.0392094	0.151274	1.23617	0.021817	3.65865
chr2L	15260000	15270000	-0.0899283	0.0601371	12.5384	0.179738	0.0296601	6.30681	0.0392094	0.151274	1.23617	0.021817	3.65865
chr2L	15270000	15280000	-0.0594599	0.222181	12.4713	0.124418	0.122028	6.17643	0.0392094	0.151274	0.76533	0.088441	6.52414
chr2L	15280000	15290000	-0.0412763	0.405001	12.4284	0.256475	0.00459833	6.37382	0.0392094	0.151274	-3.51735	0.221507	-4.38736
chr2L	15290000	15300000	-0.0574914	0.351022	12.4159	0.159466	0.0510254	6.18027	0.0392094	0.151274	0.439729	0.760772	-3.22218
chr2L	15300000	15310000	0.0560759	0.377892	12.1873	0.208914	0.0191112	6.35379	0.034861	0.18134	0	-1	0
chr2L	15310000	15320000	0.00462561	0.941397	12.3034	0.219157	0.0444654	6.4932	0.0311045	0.205752	-0.0818449	1	-3.51643
chr2L	15320000	15330000	-0.0946314	0.132397	12.1756	0.150555	0.0656836	6.19188	0.0256518	0.279371	0	-1	0
chr2L	15330000	15340000	0.0144797	0.831485	12.13	0.111054	0.176044	6.25671	0.0198469	0.369569	0.95968	0.057425	4.99759
chr2L	15340000	15350000	0.0344988	0.631362	12.1086	0.0503341	0.581202	5.87175	0.0127169	0.437974	0	-1	0
chr2L	15350000	15360000	-0.0115733	0.872529	12.1739	0.158205	0.0745767	6.15071	0.00572105	0.437974	0	-1	0
chr2L	15360000	15370000	0.0440689	0.508162	12.088	0.350087	0.00445768	7.01866	0.00301598	0.437974	0.179971	1	-3.74079
chr2L	15370000	15380000	-0.045865	0.486821	12.0768	0.215089	0.0437888	6.41917	-0.00595539	0.437974	0	-1	0
chr2L	15380000	15390000	0.0104346	0.884938	12.0168	0.580339	7.02e-06	7.45558	-0.0144237	0.437974	0.837252	0.424364	-3.11445
chr2L	15390000	15400000	-0.0172361	0.797866	12.0603	0.218894	0.0527939	6.55794	-0.0191789	0.41568	3.36496	0.228816	-4.44806
chr2L	15400000	15410000	-0.0402771	0.558026	12.1605	0.0342097	0.749875	6.45863	-0.0242355	0.316775	1.8387	1	-4.69664
chr2L	15410000	15420000	-0.0653968	0.30108	12.1948	0.269155	0.024017	6.81682	-0.0266824	0.279713	-3.52646	0.196565	-4.38415
chr2L	15420000	15430000	-0.0772024	0.185344	12.2662	0.307833	0.00524709	6.54233	-0.0292448	0.239425	-0.435859	0.555293	-1.08094
chr2L	15430000	15440000	-0.0846995	0.179226	12.242	0.175696	0.0330222	6.14158	-0.031854	0.187984	1.12779	0.341492	-2.62287
chr2L	15440000	15450000	0.105723	0.123357	12.1259	-0.0984227	0.263462	5.99344	-0.0341694	0.149715	-0.502864	0.369117	2.05672
chr2L	15450000	15460000	0.16866	0.0168537	12.0377	0.0703991	0.410494	6.28793	-0.0403608	0.102756	-0.674875	0.267945	1.85431
chr2L	15460000	15470000	-0.0579307	0.352115	12.1962	0.373169	0.00209512	6.72767	-0.0435706	0.0781899	1.92895	1	-4.68438
chr2L	15470000	15480000	-0.0887265	0.175289	12.2676	0.188298	0.0289155	6.09932	-0.0391877	0.104593	-0.424592	0.803678	-2.35407
chr2L	15480000	15490000	-0.0473931	0.36407	12.3788	0.167508	0.0389254	6.15361	-0.0391877	0.104593	0.132685	1	-3.91819
chr2L	15490000	15500000	0.0289881	0.608735	12.34	0.280358	0.000551916	6.25668	-0.0391877	0.104593	0.288555	0.512261	5.18787
chr2L	15500000	15510000	0.0323715	0.566551	12.3194	0.00762073	0.929559	5.72255	-0.0336625	0.149715	0.288555	0.512261	5.18787
chr2L	15510000	15520000	0.0316273	0.553471	12.3422	0.0361472	0.702586	5.63016	-0.0257092	0.281492	-2.65042	0.556054	-4.57661
chr2L	15520000	15530000	0.0591293	0.33537	12.3558	0.0677385	0.432042	5.80487	-0.0198963	0.393487	2.74957	0.588591	-4.57142
chr2L	15530000	15540000	0.115391	0.0507351	12.2477	0.0384432	0.666193	5.6466	-0.013376	0.3991	-0.943272	1	-4.74206
chr2L	15540000	15550000	0.0576371	0.339274	12.2186	0.0428746	0.697621	5.50483	0.00337622	0.454817	1.22247	0.419177	-3.74064
chr2L	15550000	15560000	0.0360767	0.557228	12.2699	0.0547409	0.611171	5.5945	0.0131665	0.505711	-1.97627	0.026504	-0.66829
chr2L	15560000	15570000	0.116364	0.0683877	12.1888	-0.0600125	0.651928	5.43587	0.0145709	0.533319	-1.97627	0.026504	-0.66829
chr2L	15570000	15580000	0.0990311	0.110825	12.2327	0.0279182	0.805159	5.47558	0.0145709	0.533319	-1.97627	0.026504	-0.66829
chr2L	15580000	15590000	0.174999	0.00382156	12.2048	-0.56375	1.19e-10	5.77517	0.0159675	0.533319	-1.97627	0.026504	-0.66829
chr2L	15590000	15600000	0.209006	0.00273947	12.0739	-0.72958	0.000257058	5.34989	0.0169783	0.533319	-0.774789	0.080417	5.65882
chr2L	15600000	15610000	0.0759633	0.253522	12.2369	-0.038691	0.851163	5.35834	0.0170008	0.529808	0	-1	0
chr2L	15610000	15620000	0.195646	0.001015	12.2684	-0.0782375	0.695358	5.35627	0.0165989	0.557399	-2.13889	0.178324	-3.14775
chr2L	15620000	15630000	0.125378	0.0318729	12.3356	-0.00363877	0.983184	5.46209	0.0159675	0.557399	-3.50886	0.050069	-2.19745
chr2L	15630000	15640000	0.0135716	0.796281	12.3966	0.0336195	0.710229	5.66897	0.0159675	0.557399	-0.887023	0.39966	0.513968
chr2L	15640000	15650000	0.205822	0.011281	12.2333	-0.142833	0.536266	5.31134	0.01599	0.434925	-3.04484	0.002572	0.356122
chr2L	15650000	15660000	0.0290011	0.707358	12.082	-0.0169405	0.854736	5.72788	0.01599	0.434925	-3.04484	0.002572	0.356122
chr2L	15660000	15670000	-0.0153738	0.889278	11.2606	-0.165326	0.641361	4.33897	0.0107512	0.361132	-3.17908	0.002942	-2.18911
chr2L	15670000	15680000	-0.0208879	0.812073	11.37	0.025847	0.92931	4.31491	0.0107512	0.361132	-2.82402	0.00948	-2.22785
chr2L	15680000	15690000	0.294861	4.45e-06	12.1094	-0.476748	2.57e-07	5.85948	0.00310904	0.479138	-2.3626	0.033772	-0.737549
chr2L	15690000	15700000	-0.00255223	0.993704	11.186	0.00712891	0.97335	4.28454	-0.0082296	0.479138	-2.79524	0.013369	-2.28658
chr2L	15700000	15710000	-0.0663109	0.401484	11.3617	-0.0181438	0.972946	4.34982	-0.0180908	0.361132	-2.47039	0.019626	-2.32829
chr2L	15710000	15720000	-0.00802668	0.933708	11.5855	-0.301154	0.341865	5.05389	-0.0208378	0.351636	-2.25718	0.048942	-0.942253
chr2L	15720000	15730000	0.453425	6.05e-13	12.4639	-0.975115	7.29e-21	6.22939	-0.018377	0.396805	0.951069	0.06545	5.18373
chr2L	15730000	15740000	-0.0647249	0.176132	12.4498	-0.033783	0.707263	5.85137	-0.0208378	0.396805	0.679058	0.168601	6.03902
chr2L	15740000	15750000	-0.0294165	0.570575	12.4418	0.32397	0.0105	7.1384	-0.0208378	0.443637	0.679058	0.168601	6.03902
chr2L	15750000	15760000	-0.00425004	0.941474	12.5512	0.221377	0.00727841	6.00225	-0.0208378	0.443637	1.09469	0.009309	6.57753
chr2L	15760000	15770000	-0.0387395	0.498516	12.3986	0.315801	0.00471982	6.55515	-0.018377	0.516473	1.09469	0.009309	6.57753
chr2L	15770000	15780000	0.0854104	0.128079	12.3352	-0.197923	0.146982	5.43327	-0.0187116	0.488995	0.333002	0.526948	3.60835
chr2L	15780000	15790000	0.155463	0.00934279	12.2695	-0.354163	0.281794	4.98288	-0.0187116	0.488995	0.858902	0.498795	-1.28916
chr2L	15790000	15800000	0.119123	0.0703536	12.1761	-0.373149	0.246395	5.03572	-0.0187116	0.488995	0.858902	0.498795	-1.28916
chr2L	15800000	15810000	0.139782	0.0424023	12.0239	-0.184651	0.510757	5.20797	-0.0187116	0.488995	-2.75408	0.112149	-3.94037
chr2L	15810000	15820000	0.14406	0.0253804	12.0476	-0.219152	0.478599	5.12108	-0.0187116	0.488995	-2.75408	0.112149	-3.94037
chr2L	15820000	15830000	0.384557	1.87e-06	12.1181	-0.516988	1.18e-05	5.47781	-0.0228441	0.465443	-4.01901	0.200421	-4.22738
chr2L	15830000	15840000	0.0571999	0.308187	12.3351	-0.130568	0.130417	5.88211	-0.0229995	0.465443	-4.2548	0.106607	-4.14464
chr2L	15840000	15850000	0.225159	0.00142492	12.0714	-0.220014	0.459675	5.16252	-0.0275569	0.414829	0.492966	1	-4.52535
chr2L	15850000	15860000	0.123474	0.0455255	12.2254	0.0355635	0.673814	5.733	-0.0357187	0.284025	1.51283	0.233636	-1.79642
chr2L	15860000	15870000	0.0313833	0.63035	12.1456	-0.0887672	0.691369	5.32527	-0.0446936	0.15858	-3.18325	0.345838	-4.47207
chr2L	15870000	15880000	0.183611	0.00382265	12.1524	-0.155607	0.561628	5.24355	-0.0469403	0.140339	-0.203673	0.938	-3.24728
chr2L	15880000	15890000	0.108316	0.0554884	12.3094	0.101781	0.236889	5.79003	-0.0617088	0.0915932	-0.960585	0.414095	-0.384741
chr2L	15890000	15900000	0.0254008	0.650523	12.3153	0.0343585	0.758491	5.48085	-0.0760464	0.0455608	-2.94965	0.069091	-3.76438
chr2L	15900000	15910000	0.0693287	0.272637	12.2085	0.306749	0.000454395	5.84977	-0.0760464	0.0455608	-2.19135	0.047656	-1.91609
chr2L	15910000	15920000	0.00498115	0.945087	12.2437	0.423946	1.36e-06	6.33637	-0.0772894	0.0427914	-2.63275	0.556069	-4.58003
chr2L	15920000	15930000	0.0601838	0.355102	12.2353	0.133152	0.131152	5.83584	-0.0782084	0.0410543	-2.56497	0.586809	-4.59052
chr2L	15930000	15940000	0.126937	0.0494785	12.0627	0.130222	0.276512	5.45161	-0.0786096	0.039192	-1.17653	0.380192	-2.89234
chr2L	15940000	15950000	0.157604	0.0229025	12.1	0.086286	0.37966	5.59962	-0.0816695	0.039192	-1.17653	0.380192	-2.89234
chr2L	15950000	15960000	0.166785	0.00942971	12.062	-0.245834	0.0040445	5.78443	-0.0864055	0.039192	-3.41053	0.301459	-4.40711
chr2L	15960000	15970000	0.0608261	0.432537	11.9764	-0.0805797	0.663599	5.37144	-0.0949174	0.0315903	1.36093	0.338165	-1.82883
chr2L	15970000	15980000	-0.00790844	0.919886	11.7575	-0.105906	0.589505	5.36188	-0.112936	0.0162585	-0.287446	1	-4.26825
chr2L	15980000	15990000	0.168339	0.0212711	11.7568	-0.0450262	0.7307	5.44268	-0.118252	0.00556647	-1.04835	1	-4.48033
chr2L	15990000	16000000	0.308768	2.48e-05	11.5745	-0.16657	0.58982	5.15308	-0.121712	0.00387273	0	1	-4.80255
chr2L	16000000	16010000	0.131025	0.0769404	11.471	-0.0796854	0.577759	5.41661	-0.125377	0.00332772	-2.52838	0.041786	-2.32587
chr2L	16010000	16020000	0.16703	0.0280734	11.3633	-0.0822524	0.788533	5.16928	-0.125821	0.00332772	-2.24238	0.014755	-0.040364
chr2L	16020000	16030000	0.110153	0.15167	11.4263	-0.0657696	0.746279	5.35919	-0.128204	0.00332772	-2.24238	0.014755	-0.040364
chr2L	16030000	16040000	0.0730098	0.35829	11.3959	0.0071443	0.951902	5.4912	-0.125821	0.00332772	-2.24238	0.014755	-0.040364
chr2L	16040000	16050000	0.159384	0.0566741	11.2898	0.109212	0.251298	5.64957	-0.128204	0.00349809	6.73942	8e-06	4.17124
chr2L	16050000	16060000	0.137628	0.0941254	11.3637	-0.0443398	0.851227	5.31731	-0.128081	0.00387273	-1.54022	0.218628	-2.57309
chr2L	16060000	16070000	0.0641251	0.415115	11.3484	0.00156775	0.988549	5.52374	-0.127601	0.00558011	0	-1	0
chr2L	16070000	16080000	0.0156566	0.851704	11.3787	-0.047461	0.837997	5.31852	-0.124392	0.00714744	-2.5509	0.074723	-2.50368
chr2L	16080000	16090000	0.00279407	0.980824	11.3227	0.0348667	0.809409	5.41331	-0.127601	0.00714744	-2.5509	0.074723	-2.50368
chr2L	16090000	16100000	0.106041	0.177959	11.4192	0.0668658	0.530831	5.48899	-0.127601	0.00729846	0.850649	0.712511	-4.00755
chr2L	16100000	16110000	0.0900237	0.248626	11.2859	-0.183931	0.491059	5.24046	-0.124392	0.00766785	0	-1	0
chr2L	16110000	16120000	0.0511196	0.530052	11.4852	-0.118934	0.623027	5.29999	-0.123126	0.00907758	0	-1	0
chr2L	16120000	16130000	-0.00266395	0.986367	11.4797	-0.124238	0.65489	5.22752	-0.121638	0.0107877	0	1	-4.80255
chr2L	16130000	16140000	-0.0239162	0.762876	11.4912	-0.176826	0.515317	5.23434	-0.120162	0.0119068	0.552714	0.726868	-2.12516
chr2L	16140000	16150000	0.5781	2.31e-09	11.9976	-1.22687	6.58e-25	5.7737	-0.111975	0.0132327	-1.47995	0.010504	4.42062
chr2L	16150000	16160000	0.291464	0.00234897	11.7061	-1.29153	1.75e-24	5.47622	-0.101856	0.0154818	-0.771966	0.081997	5.46559
chr2L	16160000	16170000	0.0928874	0.283022	11.6032	-0.298196	0.261865	5.24333	-0.0878621	0.028763	-2.87444	0.003285	0.612636
chr2L	16170000	16180000	0.152601	0.0306043	11.749	-0.00620536	0.962832	5.4763	-0.0652038	0.0500945	-2.87444	0.003285	0.612636
chr2L	16180000	16190000	0.122108	0.276137	11.6542	-0.213065	0.490389	5.15046	-0.0381793	0.246876	-2.04217	0.033571	0.618073
chr2L	16190000	16200000	0.103575	0.168862	11.8398	-0.331845	0.317765	4.96525	-0.0209321	0.460268	-2.04217	0.033571	0.618073
chr2L	16200000	16210000	-0.00595814	0.935129	12.1423	-0.0706445	0.479245	5.61305	-0.0179699	0.525307	0	1	-4.80255
chr2L	16210000	16220000	0.0787772	0.302162	12.2029	-0.139027	0.439524	5.38654	-0.013846	0.621134	2.79495	0.556963	-4.56125
chr2L	16220000	16230000	0.0114021	0.862122	12.329	-0.163076	0.469423	5.31979	-0.0113549	0.686547	0	1	-4.80255
chr2L	16230000	16240000	0.0271652	0.625888	12.4134	0.09202	0.311424	5.76565	-0.00744441	0.801654	-1.38832	0.067101	1.49261
chr2L	16240000	16250000	0.291413	0.000459945	12.2732	-0.575886	0.082006	4.91181	-0.00744441	0.801654	1.26462	0.026506	7.8941
chr2L	16250000	16260000	0.0271587	0.737445	12.3778	-0.180022	0.066913	5.8782	-0.00744441	0.801654	1.26462	0.026506	7.8941
chr2L	16260000	16270000	-0.214291	9.16e-05	12.5632	0.130242	0.263938	6.73403	-0.00744441	0.801654	1.22498	0.040329	7.13742
chr2L	16270000	16280000	-0.0209418	0.672421	12.4598	0.0925872	0.274014	6.12316	-0.0113549	0.686547	0.881035	0.102228	7.63852
chr2L	16280000	16290000	-0.0772512	0.145072	12.488	0.249494	0.0596496	7.22431	-0.015131	0.5635	0.881035	0.102228	7.63852
chr2L	16290000	16300000	-0.0739336	0.141367	12.5602	0.230359	0.00380764	6.2196	-0.0204375	0.396177	1.73372	0.005912	0.903097
chr2L	16300000	16310000	0.00212904	0.970759	12.4693	-0.0336482	0.723182	5.97526	-0.0242843	0.303745	1.09985	0.061769	3.60587
chr2L	16310000	16320000	-0.221528	0.00127445	12.6156	0.171088	0.0362964	6.16103	-0.026765	0.252083	0.903875	0.059271	6.75415
chr2L	16320000	16330000	-0.000570854	1	12.5182	0.0366508	0.716268	6.38805	-0.0303937	0.217388	0.903875	0.059271	6.75415
chr2L	16330000	16340000	0.294013	2.17e-05	12.6136	-0.501357	0.072022	5.22034	-0.0368158	0.217388	1.99591	0.061195	-2.8255
chr2L	16340000	16350000	-0.122282	0.044489	12.5551	0.11185	0.191503	5.93091	-0.0400001	0.18762	0.604723	0.18322	6.98003
chr2L	16350000	16360000	0.0353094	0.492149	12.3815	0.108931	0.333331	6.53284	-0.0400001	0.18762	0.604723	0.18322	6.98003
chr2L	16360000	16370000	0.0764617	0.220712	12.2366	-0.22384	0.483631	5.0895	-0.0400001	0.18762	-0.561057	0.865293	-3.82994
chr2L	16370000	16380000	0.00373417	0.948549	12.3953	-0.313744	0.301295	5.14641	-0.0400001	0.18762	0	-1	0
chr2L	16380000	16390000	-0.0532313	0.435709	12.3446	-0.0225112	0.864482	5.44423	-0.0400001	0.22057	0	-1	0
chr2L	16390000	16400000	-0.132465	0.0150716	12.4004	0.0926566	0.273551	5.70429	-0.0382899	0.274233	0	-1	0
chr2L	16400000	16410000	-0.101973	0.0447763	12.383	0.180916	0.0328419	5.9413	-0.0356462	0.315475	-0.362793	0.581917	0.970191
chr2L	16410000	16420000	-0.0494279	0.391974	12.3129	-0.0260348	0.795732	5.67733	-0.0240619	0.507753	1.11935	0.584969	-4.18996
chr2L	16420000	16430000	0.0399505	0.501859	12.2761	0.102867	0.241499	5.79623	-0.0101291	0.767325	0	-1	0
chr2L	16430000	16440000	0.00948702	0.877592	12.2765	0.251312	0.00404859	5.87947	-0.00356819	0.767325	0	-1	0
chr2L	16440000	16450000	0.0201473	0.726873	12.2902	0.0948493	0.257689	5.96697	0.00138796	0.767325	-2.42379	0.021298	-1.50139
chr2L	16450000	16460000	-0.0297995	0.597337	12.3576	0.243477	0.00252279	6.1269	0.00397196	0.767325	-1.86453	0.0283	1.90194
chr2L	16460000	16470000	-0.0554682	0.333639	12.2795	0.196354	0.0190588	5.94603	0.00549298	0.767325	0.959376	0.039611	4.55636
chr2L	16470000	16480000	-0.0398231	0.417135	12.4658	0.202704	0.0130822	6.02252	0.00549298	0.851205	0.959376	0.039611	4.55636
chr2L	16480000	16490000	-0.0354815	0.444958	12.5179	0.223042	0.00756901	6.31592	0.00673876	0.848481	7.30208	0.001422	-2.20099
chr2L	16490000	16500000	0.192745	0.00452231	12.3821	-0.241317	0.0234971	5.66539	0.0111919	0.777251	7.30208	0.001422	-2.20099
chr2L	16500000	16510000	-0.0140819	0.802304	12.357	0.0507387	0.589698	5.76211	0.022123	0.495063	0.699848	0.113714	7.47724
chr2L	16510000	16520000	0.637795	3.93e-18	13.2993	-0.723927	2.87e-08	7.10226	0.0324071	0.255235	-0.417915	0.322508	5.9798
chr2L	16520000	16530000	-0.0114456	0.830107	12.4631	0.258815	0.0341548	6.91206	0.0324071	0.255235	-0.0794756	0.861079	6.87178
chr2L	16530000	16540000	0.0428495	0.444859	12.3465	0.180108	0.124285	6.56855	0.030034	0.291775	4.71287	0.014344	-1.03139
chr2L	16540000	16550000	0.101144	0.0833204	12.3194	0.215792	0.00887482	6.0166	0.0272429	0.336301	4.22487	0.005956	-0.493876
chr2L	16550000	16560000	0.0771746	0.198377	12.4349	-0.176378	0.534813	5.2098	0.0272429	0.336301	0.782154	0.06748	6.05787
chr2L	16560000	16570000	0.167423	0.00371652	12.2641	-0.0391875	0.838767	5.37467	0.0241467	0.382705	0.782154	0.06748	6.05787
chr2L	16570000	16580000	0.0184032	0.766804	12.2292	-0.110221	0.65324	5.29476	0.0241467	0.382705	4.66397	0.015138	-1.07452
chr2L	16580000	16590000	0.0985217	0.181894	12.2088	-0.20241	0.0359795	5.71962	0.0241467	0.382705	4.46189	0.008626	-1.0549
chr2L	16590000	16600000	0.0300781	0.63037	12.2524	0.0942472	0.356315	6.39015	0.0241467	0.382705	0.782154	0.06748	6.05787
chr2L	16600000	16610000	0.110358	0.0860954	12.3852	0.0740913	0.395977	6.24785	0.0212227	0.424118	0.782154	0.06748	6.05787
chr2L	16610000	16620000	-0.157701	0.0010634	12.4817	0.00996993	0.909801	5.75371	0.0154061	0.438141	0.782154	0.06748	6.05787
chr2L	16620000	16630000	-0.0630583	0.176555	12.4813	0.0583357	0.519617	5.65742	0.00644273	0.467272	1.20171	0.036852	3.96401
chr2L	16630000	16640000	-0.047033	0.383572	12.3777	-0.143399	0.192055	5.55483	-0.00206616	0.467272	0.751144	0.115706	4.95375
chr2L	16640000	16650000	-0.014855	0.784492	12.4631	0.0431518	0.639827	5.79509	-0.0087718	0.467272	0.489104	0.247731	6.43486
chr2L	16650000	16660000	-0.144278	0.00313316	12.5281	0.0817221	0.376434	5.78009	-0.0144618	0.467272	1.05642	0.136112	0.532508
chr2L	16660000	16670000	-0.0258849	0.611886	12.4396	0.283653	0.0009513	5.8095	-0.017089	0.438141	4.66397	0.015137	-1.07452
chr2L	16670000	16680000	0.007193	0.89661	12.5075	-0.0476513	0.62633	5.68423	-0.0286425	0.313496	4.25552	0.016117	-1.05876
chr2L	16680000	16690000	0.0135886	0.832101	12.3786	0.133983	0.275632	6.87952	-0.029413	0.313496	1.33127	0.025223	3.30683
chr2L	16690000	16700000	0.00687549	0.898134	12.4326	0.175484	0.0308903	6.03346	-0.0373166	0.255861	0.639583	0.13335	7.28647
chr2L	16700000	16710000	0.109259	0.0671897	12.445	-0.120634	0.239636	5.66097	-0.0373166	0.255861	-3.01192	0.002277	3.74725
chr2L	16710000	16720000	-0.00961271	0.86019	12.4772	0.0120916	0.881698	6.03831	-0.0373166	0.230287	-3.28824	0.000848	0.436715
chr2L	16720000	16730000	0.0245207	0.607798	12.528	0.0507294	0.558879	6.26177	-0.0393174	0.1877	0.523159	0.302952	4.88772
chr2L	16730000	16740000	-0.181888	0.000486528	12.5705	0.211167	0.0110601	6.2913	-0.0373166	0.230287	0.650418	0.162484	4.04227
chr2L	16740000	16750000	-0.0536416	0.394476	12.5992	0.022402	0.798196	5.78606	-0.0343072	0.293288	0.846512	0.090361	6.40896
chr2L	16750000	16760000	0.00117089	0.989341	12.3678	-0.104648	0.246495	5.72632	-0.0319408	0.293288	0.846512	0.090361	6.40896
chr2L	16760000	16770000	0.156384	0.0036314	12.3488	-0.0883776	0.581226	5.398	-0.0319408	0.293288	-4.46606	0	8.07066
chr2L	16770000	16780000	0.074084	0.128182	12.551	-0.0249539	0.804744	5.59067	-0.0319408	0.293288	-4.46606	0	8.07066
chr2L	16780000	16790000	0.230473	0.00145989	12.8595	0.223285	0.00852009	6.10489	-0.0343072	0.266398	-4.46606	0	8.07066
chr2L	16790000	16800000	-0.00609127	0.907809	12.5201	0.0794919	0.358948	5.92229	-0.0319408	0.266398	-3.82697	0.000385	0.0108732
chr2L	16800000	16810000	-0.110068	0.0170435	12.5019	0.344746	0.00212967	6.56756	-0.0318641	0.266398	-3.82697	0.000385	0.0108732
chr2L	16810000	16820000	-0.0190417	0.71878	12.5194	-0.0440698	0.612646	5.97204	-0.0287507	0.266702	0.626252	0.351974	2.86409
chr2L	16820000	16830000	0.0794472	0.293745	12.685	0.0917937	0.263645	6.25971	-0.0249481	0.302636	0.459605	0.264377	7.10556
chr2L	16830000	16840000	0.00278205	0.968143	12.4846	-0.0353669	0.725229	5.59122	-0.0249481	0.302636	-2.60537	0.001083	2.09284
chr2L	16840000	16850000	0.0497414	0.417853	12.357	0.0854552	0.320372	6.08534	-0.0249481	0.302636	-2.60537	0.001083	2.09284
chr2L	16850000	16860000	0.137061	0.10618	12.1194	-0.276305	0.010893	5.59429	-0.0190116	0.438281	-1.49233	0.090593	-0.433185
chr2L	16860000	16870000	-0.0491499	0.345556	12.493	0.164196	0.05665	5.89843	-0.0148201	0.553469	-2.022	0.020973	1.48706
chr2L	16870000	16880000	-0.0217884	0.716247	12.4237	0.0146286	0.935579	5.34863	-0.0143669	0.576464	-2.022	0.020973	1.48706
chr2L	16880000	16890000	-0.0564878	0.296725	12.4541	0.304504	0.0074172	6.61068	-0.0137381	0.593441	1.0524	0.043311	5.15332
chr2L	16890000	16900000	-0.0372896	0.440377	12.5476	0.160717	0.063623	5.91928	-0.0137381	0.593441	0.859149	0.089065	4.10231
chr2L	16900000	16910000	-0.117825	0.0841082	12.6024	0.0786197	0.346026	6.03429	-0.0137381	0.593441	0.859149	0.089065	4.10231
chr2L	16910000	16920000	-0.198128	0.00164255	12.5808	0.111198	0.182337	5.98362	-0.0137381	0.593441	0.474628	0.265947	5.21787
chr2L	16920000	16930000	0.00500319	0.919863	12.5061	0.120421	0.190863	5.63183	-0.0143669	0.576464	0	-1	0
chr2L	16930000	16940000	0.00565059	0.935395	12.2011	-0.0856346	0.74305	5.2636	-0.0157974	0.527033	0	-1	0
chr2L	16940000	16950000	0.0305622	0.675665	12.0334	-0.113713	0.683083	5.22455	-0.0157974	0.536171	2.67001	0.55453	-4.58505
chr2L	16950000	16960000	0.261502	0.000379686	11.9117	-0.339628	0.000941892	5.52548	-0.0193684	0.46039	-0.300232	0.478875	5.61226
chr2L	16960000	16970000	0.268716	0.000293592	12.0502	-0.447339	3.06e-07	5.69639	-0.0193684	0.46039	-0.300232	0.478875	5.61226
chr2L	16970000	16980000	0.173738	0.0239424	11.516	-0.104683	0.708918	5.22909	-0.02145	0.420579	-0.383008	0.72504	-1.89011
chr2L	16980000	16990000	0.0941419	0.271707	11.3946	-0.0532569	0.835155	5.28697	-0.0233059	0.384155	-4.2588	0.082847	-4.14404
chr2L	16990000	17000000	0.0483693	0.552249	11.3635	0.0366647	0.701134	5.6149	-0.0278544	0.281379	-0.704038	0.551315	-1.60095
chr2L	17000000	17010000	0.0462701	0.571718	11.1783	0.0331195	0.778205	5.46379	-0.0308172	0.199371	0	-1	0
chr2L	17010000	17020000	0.115628	0.209758	11.2283	0.0163571	0.869244	5.58522	-0.0278544	0.279183	0.576898	0.69095	-2.22125
chr2L	17020000	17030000	0.0300163	0.735138	11.0946	-0.102581	0.605442	5.35697	-0.0231648	0.384155	0	-1	0
chr2L	17030000	17040000	0.0741991	0.42629	11.0417	-0.0288054	0.915793	5.28551	-0.0208305	0.472913	0	-1	0
chr2L	17040000	17050000	0.113524	0.167864	11.0936	0.0513406	0.660144	5.45507	-0.0208305	0.472913	-2.56496	0.586849	-4.59052
chr2L	17050000	17060000	0.0646994	0.492262	10.8565	-0.0392559	0.878228	5.29176	-0.0186874	0.553326	0	-1	0
chr2L	17060000	17070000	0.198293	0.0188248	10.984	0.0303922	0.785087	5.47335	-0.0179856	0.597071	0	1	-4.80255
chr2L	17070000	17080000	0.219093	0.0128521	10.9399	0.0169674	0.940309	5.24587	-0.0120767	0.650202	0	-1	0
chr2L	17080000	17090000	0.172874	0.0347464	11.0507	0.0102628	0.919157	5.56267	-0.00796582	0.650202	0.398386	0.817448	-2.7192
chr2L	17090000	17100000	0.0385539	0.668239	11.0175	0.0617811	0.587017	5.47366	-0.00658044	0.650202	0	-1	0
chr2L	17100000	17110000	0.15728	0.128211	10.9311	0.19727	0.0233736	5.69589	0.00177118	0.650202	-2.56496	0.586833	-4.59052
chr2L	17110000	17120000	0.198462	0.0288058	10.8812	-0.0435805	0.779742	5.41052	0.0123616	0.650202	0	-1	0
chr2L	17120000	17130000	0.168601	0.0605274	11.0411	-0.23538	0.4178	5.18813	0.0254762	0.460498	0.0737959	0.957911	-2.49852
chr2L	17130000	17140000	0.200191	0.0215879	10.9452	-0.149082	0.635297	5.09723	0.036685	0.20668	-0.314689	0.459388	6.87563
chr2L	17140000	17150000	0.432295	1.82e-09	12.0042	-0.42757	1.3e-05	5.6732	0.0407953	0.122604	-0.714271	0.233385	2.83052
chr2L	17150000	17160000	0.218189	0.00705273	11.4556	-0.113389	0.265639	5.59347	0.0407953	0.122604	-0.662985	0.244465	2.86475
chr2L	17160000	17170000	0.228733	0.00620145	11.1147	-0.0981941	0.492269	5.41458	0.0407953	0.122604	-0.314689	0.459388	6.87563
chr2L	17170000	17180000	0.251245	0.00722956	10.9734	-0.185163	0.383452	5.34109	0.0439266	0.114044	-0.314689	0.459388	6.87563
chr2L	17180000	17190000	0.14998	0.0997082	11.0398	-0.300793	0.306598	5.19179	0.046083	0.102361	1.3124	0.032106	3.40928
chr2L	17190000	17200000	0.0612305	0.418901	11.4685	-0.0187988	0.833301	5.86287	0.0439266	0.114044	1.3124	0.032106	3.40928
chr2L	17200000	17210000	0.172602	0.030438	11.5375	-0.0190819	0.829557	5.84913	0.0426586	0.117643	0.297004	0.492778	5.28027
chr2L	17210000	17220000	0.00740374	0.939708	11.2643	-0.0256895	0.800165	5.57995	0.0426586	0.121687	0.297004	0.492778	5.28027
chr2L	17220000	17230000	0.0228186	0.789839	11.2424	-0.13126	0.576474	5.31124	0.0405186	0.131183	0.297004	0.492778	5.28027
chr2L	17230000	17240000	0.0714047	0.385794	11.3383	-0.0577618	0.545584	5.62486	0.0396558	0.138683	0	-1	0
chr2L	17240000	17250000	0.0937059	0.25317	11.3976	0.316835	0.000397647	6.33498	0.0360253	0.190873	0.674003	0.239256	1.92367
chr2L	17250000	17260000	0.176943	0.0568902	11.2504	-0.198491	0.465111	5.23412	0.0363461	0.16206	0.968607	0.088312	2.4311
chr2L	17260000	17270000	0.0545828	0.51626	11.3069	0.222702	0.00707683	6.31192	0.0396558	0.138683	0.968607	0.088312	2.4311
chr2L	17270000	17280000	0.566881	1.2e-17	12.2612	-0.609496	1.31e-13	6.27034	0.0363461	0.16206	-0.654235	0.129245	5.23507
chr2L	17280000	17290000	0.149192	0.0518229	11.5314	-0.105244	0.616691	5.33795	0.031062	0.216493	-0.377322	1	-4.77836
chr2L	17290000	17300000	0.141763	0.17923	11.3917	-0.0506305	0.686125	5.45799	0.0270635	0.265304	0.821374	0.60928	-2.88514
chr2L	17300000	17310000	0.0376795	0.643341	11.558	-0.00213452	0.998823	5.38704	0.0247822	0.289426	0	-1	0
chr2L	17310000	17320000	0.0755182	0.382954	11.5267	-0.263557	0.405305	5.05466	0.0231101	0.353407	1.12024	0.603225	-4.17131
chr2L	17320000	17330000	0.054441	0.431517	11.8212	-0.0367353	0.869344	5.33209	0.0231101	0.365281	-2.59721	0.555096	-4.5871
chr2L	17330000	17340000	0.0786306	0.306915	11.9771	-0.496166	0.00119517	5.41807	0.0247822	0.310629	-1.28952	0.010467	3.16474
chr2L	17340000	17350000	0.0273861	0.678167	12.1496	-0.036931	0.743137	5.48419	0.0235287	0.365281	0	-1	0
chr2L	17350000	17360000	0.0867	0.274164	12.2086	-0.224342	0.470586	5.12825	0.0177848	0.489469	-0.813721	1	-4.62984
chr2L	17360000	17370000	0.124003	0.140226	12.2442	-0.367903	0.270423	5.00746	0.012526	0.635674	0.539457	0.244267	5.48819
chr2L	17370000	17380000	-0.0527675	0.336065	12.4086	0.0681928	0.434238	5.77755	0.0113191	0.714109	0.539457	0.244267	5.48819
chr2L	17380000	17390000	-0.00977073	0.862643	12.4724	0.154548	0.0623654	6.29666	0.00964952	0.761994	0.539457	0.244267	5.48819
chr2L	17390000	17400000	0.0601334	0.338148	12.2416	-0.22023	0.483184	5.08729	0.0113191	0.714109	0.512849	0.247122	6.44605
chr2L	17400000	17410000	-0.00308957	0.962819	12.5453	0.0492423	0.596241	5.6622	0.00964952	0.748354	0.729581	0.132923	4.00307
chr2L	17410000	17420000	-0.111115	0.049942	12.5583	0.160023	0.046414	6.05872	0.00568062	0.748354	0.729581	0.132923	4.00307
chr2L	17420000	17430000	0.141098	0.0133561	12.3505	-0.226817	0.0428345	5.50599	7.8e-05	0.748354	-0.187488	0.760123	4.57446
chr2L	17430000	17440000	-0.0743446	0.155602	12.4012	0.0419513	0.605999	6.18377	-0.00342347	0.748354	0.978116	0.458011	0.199233
chr2L	17440000	17450000	-0.033065	0.522626	12.4176	-0.0651297	0.46175	5.71452	-0.00445995	0.644074	0.28712	0.701265	0.741722
chr2L	17450000	17460000	0.0462098	0.435633	12.4041	0.142869	0.0792351	6.20436	-0.0126098	0.528949	-1.60567	0.155977	1.17339
chr2L	17460000	17470000	-0.0969033	0.053555	12.5298	0.0737184	0.38835	5.85573	-0.0286873	0.330917	0.436734	0.31477	5.39099
chr2L	17470000	17480000	-0.128666	0.0364561	12.5966	0.222906	0.00486552	6.27191	-0.037896	0.186776	0.93058	0.056414	7.26947
chr2L	17480000	17490000	-0.0866698	0.192682	12.6085	0.146846	0.0768068	6.1828	-0.0403996	0.17492	2.10136	0.051151	0.753873
chr2L	17490000	17500000	-0.165445	0.000685391	12.556	0.0936553	0.264369	6.02887	-0.0439885	0.151596	3.62205	0.004018	-2.33213
chr2L	17500000	17510000	-0.104848	0.156748	12.6249	0.242835	0.00223084	6.21351	-0.0464107	0.133658	0.965636	0.049961	4.62635
chr2L	17510000	17520000	-0.123695	0.0185878	12.4906	0.171312	0.0441409	5.98124	-0.0475438	0.126398	0.601056	0.40183	-0.178266
chr2L	17520000	17530000	-0.012966	0.825113	12.3094	0.0510782	0.558336	5.82225	-0.0464107	0.133658	0.601056	0.40183	-0.178266
chr2L	17530000	17540000	0.0905479	0.19875	12.1282	0.00243706	0.983393	5.43842	-0.044311	0.13835	0.996253	0.465182	-2.97846
chr2L	17540000	17550000	0.113407	0.101054	11.9725	-0.0291684	0.919157	5.26353	-0.0464107	0.133658	-2.63275	0.556072	-4.58003
chr2L	17550000	17560000	0.154043	0.0686288	11.9096	-0.0759135	0.773923	5.26132	-0.0464107	0.133658	0.177063	0.920923	-3.21958
chr2L	17560000	17570000	0.156847	0.0575977	11.824	0.0805164	0.501464	5.45433	-0.044311	0.136721	-2.92668	0.123291	-3.2317
chr2L	17570000	17580000	0.0593834	0.380294	11.7865	-0.0287762	0.908956	5.30557	-0.0429116	0.142139	-0.863496	1	-4.43162
chr2L	17580000	17590000	0.185931	0.00860245	11.7394	-0.0234661	0.812675	5.59983	-0.0429116	0.142139	-2.25105	0.085973	-2.38299
chr2L	17590000	17600000	0.187486	0.00632636	11.7698	-0.0121582	0.973441	5.25288	-0.0416908	0.148915	-3.37154	0.025459	-2.53321
chr2L	17600000	17610000	0.203669	0.0125239	11.6535	0.0882643	0.385724	5.60591	-0.0373253	0.226591	-1.84925	0.19393	-2.76248
chr2L	17610000	17620000	0.204977	0.00650016	11.6494	0.0391887	0.83624	5.34772	-0.0266226	0.447161	0	1	-4.80255
chr2L	17620000	17630000	0.1055	0.159134	11.597	-0.0297079	0.811993	5.46355	-0.017037	0.448185	1.36947	0.684277	-4.37335
chr2L	17630000	17640000	0.132128	0.0627591	11.6529	-0.182166	0.389064	5.33094	-0.00176628	0.448185	-0.904581	1	-4.74748
chr2L	17640000	17650000	0.264212	0.00372154	11.5419	-0.240552	0.454427	5.05459	0.0123819	0.448185	1.84873	0.37421	-4.26039
chr2L	17650000	17660000	0.0620937	0.406933	11.7111	-0.0812615	0.434848	5.55104	0.0146464	0.448185	0.059095	0.899355	5.15916
chr2L	17660000	17670000	0.0714299	0.33919	11.6655	-0.125717	0.453735	5.38879	0.0246843	0.448185	0.059095	0.899355	5.15916
chr2L	17670000	17680000	0.182833	0.0218725	11.6214	-0.137545	0.530253	5.32841	0.033684	0.30126	0	-1	0
chr2L	17680000	17690000	0.416697	3.06e-11	12.0697	-0.560118	1.13e-09	5.8434	0.0343021	0.29625	-0.790542	0.067541	5.30405
chr2L	17690000	17700000	0.382538	1.52e-09	12.208	-0.404472	3.07e-06	5.84137	0.0343021	0.29625	-0.790542	0.067541	5.30405
chr2L	17700000	17710000	0.0535001	0.502192	11.7048	-0.113439	0.256523	5.57031	0.0343021	0.29625	-0.361683	0.606469	-0.318001
chr2L	17710000	17720000	0.287112	0.000154967	11.5684	-0.249951	0.0228473	5.52043	0.0343021	0.29625	-0.022232	0.957762	6.07258
chr2L	17720000	17730000	-0.0346253	0.644528	12.0999	-0.0465097	0.57978	5.99814	0.0341545	0.249414	-0.17351	0.711138	3.59627
chr2L	17730000	17740000	0.0599572	0.458811	11.7426	-0.0505664	0.648652	5.48978	0.0341545	0.246439	-0.022232	0.957762	6.07258
chr2L	17740000	17750000	-0.0109451	0.889447	11.7525	0.152277	0.0619037	6.2344	0.0327388	0.297248	-0.022232	0.957762	6.07258
chr2L	17750000	17760000	0.0895403	0.257497	11.7173	0.156185	0.0601353	6.02934	0.0276501	0.342165	0.43728	0.699168	-2.83191
chr2L	17760000	17770000	0.0753474	0.318367	11.6747	-0.0395039	0.693006	5.62446	0.0217806	0.425578	-0.022232	0.957762	6.07258
chr2L	17770000	17780000	0.0953941	0.243706	11.7172	0.0729284	0.386139	5.96615	0.0167079	0.482558	-0.022232	0.957762	6.07258
chr2L	17780000	17790000	0.093956	0.197755	11.6475	0.0981216	0.271968	5.85917	0.0120615	0.482558	-5.33354	0.003136	-2.14404
chr2L	17790000	17800000	0.0925578	0.198844	11.8452	0.147591	0.0844324	5.6965	0.0120615	0.446567	-2.91364	0.005474	-1.41495
chr2L	17800000	17810000	0.216353	0.00240171	11.6716	-0.0760275	0.622052	5.4048	0.00609853	0.423389	-3.46626	0.007251	-1.96918
chr2L	17810000	17820000	0.29054	0.000241402	11.579	-0.209838	0.528946	4.88172	-0.0121447	0.423389	-3.46626	0.007251	-1.96918
chr2L	17820000	17830000	0.521132	6.66e-07	11.9314	-1.1664	5.21e-35	5.76648	-0.0281143	0.423389	-1.29281	0.020266	6.01284
chr2L	17830000	17840000	0.0484023	0.556192	11.6331	-0.083474	0.709401	5.32276	-0.0333622	0.423389	-1.09931	0.025141	10.9737
chr2L	17840000	17850000	0.129567	0.119325	11.5769	-0.0436236	0.834077	5.3487	-0.0383795	0.344463	-1.09931	0.025141	10.9737
chr2L	17850000	17860000	0.079841	0.341931	11.6441	0.102571	0.352572	5.48316	-0.0525289	0.193621	-1.09931	0.025141	10.9737
chr2L	17860000	17870000	0.148546	0.0636017	11.5684	-0.112263	0.565444	5.36052	-0.0716629	0.0806703	-1.09931	0.025141	10.9737
chr2L	17870000	17880000	0.0890478	0.231198	11.5302	-0.0141465	0.936213	5.40122	-0.0814137	0.0357342	-1.09931	0.025141	10.9737
chr2L	17880000	17890000	0.174692	0.0207236	11.6192	-0.116734	0.617366	5.30846	-0.0814137	0.0357342	-1.09931	0.025141	10.9737
chr2L	17890000	17900000	0.163485	0.0269412	11.6325	-0.145628	0.597094	5.22425	-0.0814137	0.0357342	0.0270921	1	-4.37246
chr2L	17900000	17910000	0.11576	0.134648	11.7415	0.036626	0.799793	5.40963	-0.0814137	0.0357342	-5.73984	0.015741	-3.3666
chr2L	17910000	17920000	0.152435	0.0244448	11.8225	-0.557365	0.0018375	5.3756	-0.0814137	0.0357342	-1.64023	0.000331	4.39785
chr2L	17920000	17930000	0.195783	0.00926903	11.8027	-0.0805608	0.659742	5.37514	-0.0642115	0.0479193	0	1	-4.80255
chr2L	17930000	17940000	0.176359	0.0107397	11.8347	-0.000491804	0.996182	5.32583	-0.0470895	0.0768238	-1.80921	1	-4.69241
chr2L	17940000	17950000	0.10353	0.126323	12.0634	-0.0962469	0.718997	5.25208	-0.0414314	0.114142	0.728828	0.735193	-3.75155
chr2L	17950000	17960000	0.00479127	0.940429	12.3861	-0.069166	0.433823	5.88431	-0.0340377	0.162852	-0.173919	0.712947	3.53204
chr2L	17960000	17970000	0.00461372	0.938849	12.3338	-0.0172052	0.847594	5.7036	-0.0315071	0.191547	1.72273	0.019538	1.62464
chr2L	17970000	17980000	-0.0141077	0.792613	12.4509	0.189382	0.0287957	5.93495	-0.0294326	0.231043	0.989039	0.105455	2.33508
chr2L	17980000	17990000	0.196748	0.00161566	12.573	-0.192746	0.0397247	5.83381	-0.0254728	0.309671	0.572317	0.546311	-2.15636
chr2L	17990000	18000000	-0.00762179	0.883974	12.4882	-0.0623383	0.494938	5.67837	-0.0200329	0.400438	0.669795	0.741832	-3.30238
chr2L	18000000	18010000	-0.0708009	0.280985	12.2491	0.298056	0.00603518	6.4083	-0.00838111	0.59892	1.36674	0.187883	-2.93327
chr2L	18010000	18020000	0.0409425	0.507823	12.2483	0.160775	0.0455047	6.02731	0.00046849	0.59892	3.23963	0.315323	-4.47122
chr2L	18020000	18030000	0.116261	0.0444494	12.2411	-0.0183502	0.951424	5.26906	0.00614838	0.59892	0.264685	0.521976	7.93534
chr2L	18030000	18040000	0.0897636	0.134015	12.2914	-0.0792833	0.711213	5.33311	0.00848956	0.59892	0.264685	0.521976	7.93534
chr2L	18040000	18050000	-0.0356744	0.591781	12.2865	0.0277496	0.776241	5.60762	0.00848956	0.669381	0.264685	0.521976	7.93534
chr2L	18050000	18060000	0.42403	1.99e-06	12.2907	-1.65387	1.39e-61	6.07247	0.00848956	0.59892	0.467286	0.331625	3.73354
chr2L	18060000	18070000	-0.00658724	0.921789	12.3307	-0.178946	0.0371475	5.69417	0.00848956	0.585939	0.264685	0.521976	7.93534
chr2L	18070000	18080000	0.0144769	0.815795	12.3188	0.0219694	0.811751	5.63356	0.00848956	0.585939	-1.77992	0.405784	-2.7809
chr2L	18080000	18090000	0.0990809	0.0834312	12.3722	-0.00812462	0.948145	5.49446	0.0121771	0.585939	-3.24911	0.012209	-2.02539
chr2L	18090000	18100000	-0.0764743	0.191277	12.3831	0.0489105	0.615205	5.57401	0.012481	0.607239	-3.90737	0.000463	-1.58008
chr2L	18100000	18110000	0.033007	0.526947	12.3692	0.0326091	0.771772	5.48075	0.0155141	0.551766	0	-1	0
chr2L	18110000	18120000	0.0893143	0.145317	12.3198	-0.0419066	0.724803	5.47326	0.0155141	0.551766	3.22559	0.001588	0.272714
chr2L	18120000	18130000	0.0604157	0.225255	12.51	0.442967	3.26e-05	6.41766	0.0155141	0.551766	2.95804	4e-06	4.85496
chr2L	18130000	18140000	-0.0499638	0.311362	12.5274	0.189527	0.0226248	6.05237	0.0155141	0.478934	1.6424	0.000626	6.32646
chr2L	18140000	18150000	-0.114563	0.0172004	12.5082	0.236188	0.0123288	6.37102	0.020971	0.351002	0.868053	0.169788	1.80346
chr2L	18150000	18160000	0.0266576	0.655649	12.4485	0.460986	5.48e-05	6.58484	0.0277568	0.287736	-4.59003	0.00055	-1.77174
chr2L	18160000	18170000	0.0522997	0.38388	12.3613	-0.0921935	0.71861	5.28004	0.0388164	0.177536	-4.59003	0.00055	-1.77174
chr2L	18170000	18180000	-0.0152842	0.806527	12.3322	-0.172368	0.491979	5.28485	0.0524953	0.07522	-3.08455	0.339957	-4.49242
chr2L	18180000	18190000	-0.0949973	0.0869639	12.299	0.0456981	0.62953	5.65658	0.0532771	0.0700684	-4.80356	0.038407	-3.89841
chr2L	18190000	18200000	-0.0150915	0.803107	12.2637	-0.00579762	0.966926	5.49141	0.054333	0.0664999	-1.30129	0.300368	-2.59475
chr2L	18200000	18210000	-0.0512604	0.385405	12.2921	0.0633742	0.472826	5.71621	0.054333	0.0664999	-2.04171	0.028179	0.140769
chr2L	18210000	18220000	0.107675	0.09241	12.1569	-0.132483	0.672374	5.12878	0.0583714	0.0664999	-2.04171	0.028179	0.140769
chr2L	18220000	18230000	-0.0406967	0.536115	12.1933	-0.103654	0.724264	5.18962	0.0603586	0.0467224	-2.04171	0.028179	0.140769
chr2L	18230000	18240000	0.0299493	0.639407	12.1807	-0.111858	0.628779	5.31713	0.062176	0.0535948	-2.04171	0.028179	0.140769
chr2L	18240000	18250000	-0.0281301	0.686454	12.1669	-0.148925	0.60636	5.19827	0.0673455	0.0491104	-2.04171	0.028179	0.140769
chr2L	18250000	18260000	-0.024666	0.719884	12.1793	-0.183414	0.468133	5.27464	0.062176	0.0714767	-4.75564	0.11388	-3.90926
chr2L	18260000	18270000	0.0392865	0.530472	12.2038	-0.0631979	0.6222	5.44694	0.0563203	0.0846801	-2.82934	0.231529	-3.50477
chr2L	18270000	18280000	-0.0390261	0.52897	12.2429	0.080215	0.43019	5.57162	0.0504706	0.0882485	-3.18925	0.005374	-1.27752
chr2L	18280000	18290000	0.0302593	0.666972	12.2181	0.0573481	0.560817	5.5771	0.0504706	0.0856314	2.13354	0.169899	-3.2641
chr2L	18290000	18300000	0.016161	0.793461	12.2029	0.083897	0.336602	5.72765	0.0471813	0.0977629	0.765287	0.540919	-1.87677
chr2L	18300000	18310000	0.0129559	0.861145	12.2389	-0.0462745	0.611617	5.8635	0.0440116	0.0987924	2.79495	0.55696	-4.56125
chr2L	18310000	18320000	-0.053489	0.440118	12.2484	0.310184	0.0157405	7.29014	0.0404059	0.126832	0.787653	0.256519	-0.627578
chr2L	18320000	18330000	-0.10961	0.0597448	12.3008	0.132061	0.135665	6.16161	0.0363858	0.146182	1.00902	0.063413	7.24779
chr2L	18330000	18340000	-0.0704156	0.270351	12.2661	-0.229319	0.034731	5.55344	0.0347999	0.151858	0.483864	0.289685	8.21449
chr2L	18340000	18350000	-0.0653147	0.274213	12.3763	0.185698	0.0199405	6.06188	0.0338042	0.173996	0.483864	0.289685	8.21449
chr2L	18350000	18360000	-0.0630426	0.273857	12.3236	0.165178	0.040513	6.24954	0.0338042	0.173996	0.483864	0.289685	8.21449
chr2L	18360000	18370000	-0.188765	0.00241032	12.2398	-0.0464801	0.690468	5.52493	0.0338042	0.173996	-0.120311	0.772454	6.91597
chr2L	18370000	18380000	0.0245334	0.677647	12.2667	-0.0810428	0.427026	5.57904	0.0347999	0.151858	-0.120311	0.772454	6.91597
chr2L	18380000	18390000	-0.0396332	0.463074	12.3371	0.0275387	0.762395	5.78103	0.0347999	0.155492	0.708646	0.165817	8.76463
chr2L	18390000	18400000	0.0999889	0.24709	12.2111	-0.312485	0.30989	5.14088	0.0371537	0.155552	0.708646	0.165817	8.76463
chr2L	18400000	18410000	0.0927947	0.0852736	12.4285	-0.320331	0.000215164	5.7801	0.0341121	0.232776	-0.267944	0.521256	5.79067
chr2L	18410000	18420000	0.148491	0.00983944	12.3947	-0.454033	2.82e-07	5.74764	0.0341121	0.235587	-0.267944	0.521256	5.79067
chr2L	18420000	18430000	-0.00869828	0.880595	12.3373	-0.322373	0.314133	5.05805	0.0341121	0.21546	0	-1	0
chr2L	18430000	18440000	-0.0443235	0.367364	12.4657	-0.0571645	0.595397	5.50862	0.0341121	0.21546	-1.88663	1	-4.68158
chr2L	18440000	18450000	-0.0593805	0.260643	12.5782	0.238598	0.00396814	6.28699	0.0341121	0.21546	0.963087	0.046337	5.95953
chr2L	18450000	18460000	-0.117911	0.0210034	12.5598	0.337355	0.00486156	6.6388	0.0280424	0.293778	2.05412	1.8e-05	5.82802
chr2L	18460000	18470000	0.035026	0.560722	12.3409	0.496616	0.00051742	7.46833	0.0273504	0.297916	2.05412	1.8e-05	5.82802
chr2L	18470000	18480000	0.0592878	0.331721	12.4048	0.0690826	0.445254	5.89365	0.0201011	0.329249	2.05412	1.8e-05	5.82802
chr2L	18480000	18490000	0.0603956	0.224042	12.4243	0.116979	0.283792	6.39738	0.00155683	0.329249	1.32693	0.008528	3.74766
chr2L	18490000	18500000	0.0175809	0.708193	12.4866	0.0627634	0.47013	5.95148	-0.0119381	0.406838	0.876832	0.043154	6.05509
chr2L	18500000	18510000	-0.00353306	0.967751	12.4507	0.111737	0.183161	5.94128	-0.0163782	0.391494	0.876832	0.043154	6.05509
chr2L	18510000	18520000	0.155226	0.00186576	12.3968	0.118469	0.141942	6.09376	-0.0191244	0.443251	0.478615	0.505289	2.10818
chr2L	18520000	18530000	0.274361	4.59e-05	12.6658	0.0506586	0.558509	5.93079	-0.0211232	0.443251	0.324622	0.499038	5.66473
chr2L	18530000	18540000	-0.00477258	0.950846	12.6143	0.125738	0.143932	6.0007	-0.0256394	0.349673	0.324622	0.499038	5.66473
chr2L	18540000	18550000	-0.172659	0.00031886	12.5269	0.0698534	0.4282	5.74534	-0.0289669	0.278824	0.171233	0.683495	6.96905
chr2L	18550000	18560000	0.0170354	0.746479	12.4638	-0.0313625	0.785247	5.5203	-0.0300839	0.276185	0.171233	0.683495	6.96905
chr2L	18560000	18570000	-0.063701	0.172179	12.4901	0.0735744	0.41548	6.35739	-0.0292769	0.276185	0.171233	0.683495	6.96905
chr2L	18570000	18580000	0.0110956	0.826589	12.4558	0.0723761	0.387353	6.29271	-0.0292769	0.276185	0.171233	0.683495	6.96905
chr2L	18580000	18590000	0.257744	2.47e-06	12.4968	-0.482584	1.47e-07	5.80858	-0.0256394	0.347034	-0.481869	0.257347	5.12407
chr2L	18590000	18600000	-0.0202148	0.683127	12.5543	0.0643004	0.465306	5.93181	-0.0256394	0.347034	0.745315	0.105172	5.34841
chr2L	18600000	18610000	0.0932454	0.0735466	12.5721	0.109972	0.218133	6.04999	-0.0224077	0.426201	0.646497	0.146198	5.17418
chr2L	18610000	18620000	-0.0135081	0.847428	12.6177	0.141061	0.085259	6.15813	-0.0214201	0.450927	-3.774	0.125793	-4.31119
chr2L	18620000	18630000	0.0119186	0.824858	12.473	-0.0520215	0.556179	5.95997	-0.0201167	0.479346	-0.00659735	0.987381	6.57807
chr2L	18630000	18640000	0.429869	7.85e-21	12.5245	-0.703809	2.15e-17	6.13391	-0.0201167	0.479346	-0.265527	0.520263	6.01356
chr2L	18640000	18650000	-0.0619075	0.226834	12.5414	0.101974	0.21714	6.07705	-0.0201167	0.479346	-0.0250026	0.951828	6.44938
chr2L	18650000	18660000	0.00265917	0.966295	12.5202	0.017814	0.845961	5.84216	-0.0201167	0.479346	0.487717	0.265937	5.65972
chr2L	18660000	18670000	-0.13227	0.00629355	12.5524	0.291858	0.0153269	6.75257	-0.0201167	0.463402	1.04366	0.033298	4.53799
chr2L	18670000	18680000	-0.0757118	0.170787	12.5639	0.109977	0.177714	6.25136	-0.0190327	0.463402	0.729082	0.14976	4.22053
chr2L	18680000	18690000	-0.00808268	0.89662	12.5944	0.148122	0.0820955	6.26142	-0.0190327	0.463402	0.750276	0.108901	6.38523
chr2L	18690000	18700000	-0.0971995	0.0475021	12.5564	0.0341397	0.702917	6.34851	-0.0147803	0.565977	1.3324	0.060084	2.18483
chr2L	18700000	18710000	-0.101707	0.157335	12.7391	0.127912	0.253572	6.57038	-0.0194837	0.420406	1.14616	0.035149	3.03444
chr2L	18710000	18720000	-0.0729358	0.162603	12.5754	0.266522	0.00150771	6.17427	-0.0225929	0.34674	-2.83233	0.033	-2.10321
chr2L	18720000	18730000	-0.119283	0.0165655	12.5327	0.0967996	0.278402	5.81582	-0.0225929	0.34674	0	-1	0
chr2L	18730000	18740000	-0.0423751	0.381972	12.4847	0.298023	0.00533278	6.44819	-0.0184206	0.467145	-2.2982	0.039321	-1.98642
chr2L	18740000	18750000	-0.10676	0.0250593	12.5173	0.410004	5.11e-05	6.3897	-0.0144991	0.592825	1.30201	0.329641	-2.46788
chr2L	18750000	18760000	-0.0644657	0.219684	12.4919	0.236707	0.00369045	6.07196	-0.0144991	0.592825	1.30201	0.329641	-2.46788
chr2L	18760000	18770000	-0.145829	0.00467516	12.4477	0.273383	0.00121463	6.01099	-0.0144991	0.592825	-1.3369	0.086157	0.366575
chr2L	18770000	18780000	-0.0936632	0.071299	12.5271	0.0964868	0.272645	5.84787	-0.0171114	0.545969	-1.3369	0.086157	0.366575
chr2L	18780000	18790000	0.000405884	0.998771	12.486	0.114376	0.180907	5.73728	-0.0241033	0.433374	-1.06467	0.218422	-0.443673
chr2L	18790000	18800000	-0.0311927	0.538766	12.5538	0.254621	0.00154037	6.07183	-0.0244219	0.433374	-1.06467	0.218422	-0.443673
chr2L	18800000	18810000	-0.0933918	0.0929206	12.5514	0.232303	0.00793975	5.93305	-0.0244219	0.433374	0.449308	0.617494	3.06479
chr2L	18810000	18820000	-0.00536665	0.924359	12.505	0.00214435	0.983604	5.52099	-0.0244219	0.433374	2.54072	0.174082	-4.05854
chr2L	18820000	18830000	-0.0154594	0.778467	12.5779	0.182061	0.0209004	6.24622	-0.0288905	0.335886	2.54072	0.174082	-4.05854
chr2L	18830000	18840000	-0.179954	0.0121639	12.6472	0.216546	0.040727	6.41865	-0.0305066	0.302988	1.07189	0.043088	5.44073
chr2L	18840000	18850000	0.11007	0.0484951	12.5812	-0.00161196	0.99499	5.56809	-0.0305066	0.302988	1.07189	0.043088	5.44073
chr2L	18850000	18860000	-0.0211577	0.669117	12.5412	0.0334345	0.701905	5.95241	-0.0305066	0.302988	-1.2447	0.181378	-0.541598
chr2L	18860000	18870000	-0.160836	0.00115736	12.5371	0.156384	0.0631135	6.11641	-0.031038	0.284437	0.709766	0.21178	3.89611
chr2L	18870000	18880000	-0.0854173	0.0773458	12.4999	0.171742	0.0297745	6.24609	-0.0322447	0.267263	0	-1	0
chr2L	18880000	18890000	-0.0647102	0.185769	12.5195	0.334158	0.000564436	6.38333	-0.03854	0.188925	-0.128998	0.827107	1.7373
chr2L	18890000	18900000	-0.131365	0.0304043	12.5776	0.267276	0.000728745	6.24372	-0.0407551	0.134074	1.19868	0.166724	-2.65269
chr2L	18900000	18910000	-0.0429123	0.440999	12.5238	0.202811	0.0113389	6.04254	-0.0407551	0.134074	1.01277	0.553365	-3.82243
chr2L	18910000	18920000	-0.0800359	0.145498	12.465	0.0579336	0.551889	5.61667	-0.0332531	0.205112	0.763161	0.096477	5.84272
chr2L	18920000	18930000	-0.125433	0.0137237	12.5665	0.141376	0.0983135	5.94619	-0.0290159	0.302163	0.763161	0.096477	5.84272
chr2L	18930000	18940000	-0.0971408	0.0446507	12.441	0.163119	0.0518335	5.97064	-0.0256994	0.358397	0.763161	0.096477	5.84272
chr2L	18940000	18950000	-0.161288	0.0235038	12.6374	0.477149	0.000449259	7.48569	-0.0242289	0.358397	0.763161	0.096477	5.84272
chr2L	18950000	18960000	-0.0891915	0.098507	12.4749	0.137969	0.0860017	6.07034	-0.0192133	0.453908	1.37739	0.016049	4.72722
chr2L	18960000	18970000	-0.0503017	0.298859	12.4524	0.139523	0.0943668	5.96483	-0.0192133	0.453908	0.469958	0.280869	5.36586
chr2L	18970000	18980000	-0.0524361	0.328501	12.5726	0.0948318	0.243765	6.01665	-0.0192133	0.458477	-0.599435	0.276441	2.60569
chr2L	18980000	18990000	-0.054964	0.305319	12.5297	0.119901	0.130055	6.2173	-0.0161194	0.546823	0.951227	0.059528	3.49535
chr2L	18990000	19000000	-0.0246955	0.670883	12.46	0.0521565	0.553847	5.72957	-0.0161194	0.546823	-1.5218	0.138371	1.8474
chr2L	19000000	19010000	-0.174172	0.0188325	12.637	0.246108	0.0257199	6.45912	-0.0161194	0.546823	1.52657	0.009257	2.94811
chr2L	19010000	19020000	-0.129012	0.0719227	12.6648	0.275124	0.00168285	5.93192	-0.020972	0.469916	0.835675	1	-4.59261
chr2L	19020000	19030000	-0.0115778	0.878209	12.6277	0.0535183	0.510971	6.00815	-0.020972	0.469916	-1.67847	0.121237	-1.3299
chr2L	19030000	19040000	-0.0853588	0.164425	12.5525	0.173175	0.0293546	6.22801	-0.020972	0.467522	-1.67847	0.121237	-1.3299
chr2L	19040000	19050000	-0.128927	0.0583183	12.6192	0.176334	0.0285291	6.3029	-0.025493	0.345943	0.72478	0.124639	6.99134
chr2L	19050000	19060000	-0.179208	0.0114929	12.621	0.253258	0.00582756	6.34857	-0.025493	0.345943	0.60259	0.195755	4.84063
chr2L	19060000	19070000	-0.0567486	0.45031	12.6189	0.254943	0.00225582	6.2872	-0.0197995	0.467522	0.455789	0.439784	1.84251
chr2L	19070000	19080000	-0.0117109	0.865605	12.2457	0.189939	0.0246722	5.78098	-0.0148315	0.368857	-3.01884	0.00296	-1.15406
chr2L	19080000	19090000	-0.0900618	0.0841305	12.5214	0.182921	0.0323792	5.8412	-0.0140767	0.35928	-3.01884	0.00296	-1.15406
chr2L	19090000	19100000	-0.190826	5.26e-05	12.4731	0.172888	0.0602243	5.87403	-0.011546	0.439456	0	1	-4.80255
chr2L	19100000	19110000	-0.0555562	0.264233	12.4277	0.191652	0.0280528	5.872	-0.00027576	0.439456	-2.90154	0.020957	-2.6097
chr2L	19110000	19120000	-0.0746695	0.27056	12.6127	0.268194	0.000968555	6.19896	0.0133994	0.494594	-1.1471	0.096532	3.57095
chr2L	19120000	19130000	-0.136395	0.0084599	12.5673	0.210392	0.0207431	6.37657	0.0194436	0.449094	-1.1471	0.096532	3.57095
chr2L	19130000	19140000	-0.0988656	0.126607	12.59	0.31093	0.0132887	7.13622	0.0230363	0.40668	1.02205	0.10534	1.89501
chr2L	19140000	19150000	-0.0253346	0.665448	12.2975	0.0250738	0.833257	6.72375	0.0247969	0.40668	1.54328	0.024338	2.28123
chr2L	19150000	19160000	-0.0496225	0.449113	12.2029	0.0376116	0.764734	6.82454	0.0251611	0.40668	1.46564	0.01119	4.38684
chr2L	19160000	19170000	-0.179054	0.0119442	12.6342	0.271158	0.027129	7.02106	0.0251611	0.40668	0.903443	0.05565	8.80882
chr2L	19170000	19180000	0.170955	0.0416595	12.0823	-0.340597	0.252457	5.1696	0.0243695	0.449094	0.903443	0.05565	8.80882
chr2L	19180000	19190000	-0.10311	0.141226	12.6226	0.191502	0.0315584	6.35491	0.0243695	0.449094	5.41004	0.000807	0.801777
chr2L	19190000	19200000	-0.0894456	0.078215	12.4912	0.232693	0.0322296	6.46841	0.0234006	0.460983	0.383501	0.38622	4.75242
chr2L	19200000	19210000	-0.131644	0.0179864	12.5945	0.288556	0.00048904	6.30309	0.0111456	0.48349	1.41768	0.011963	6.18156
chr2L	19210000	19220000	-0.128743	0.0122039	12.465	0.170375	0.0299728	6.26671	-0.00106999	0.51486	0.00326312	1	-4.59117
chr2L	19220000	19230000	-0.0705454	0.260036	12.4136	0.329367	0.00402374	6.579	-0.00241305	0.522911	0	-1	0
chr2L	19230000	19240000	-0.0832917	0.0809299	12.4726	0.108332	0.217087	6.01654	-0.00847285	0.522911	0	-1	0
chr2L	19240000	19250000	-0.181271	0.00063326	12.3657	0.187427	0.0227941	6.01872	-0.0135354	0.56914	0	-1	0
chr2L	19250000	19260000	-0.0569914	0.272664	12.4437	0.123101	0.152915	5.84075	-0.0151368	0.56914	2.12887	0.25968	-4.17787
chr2L	19260000	19270000	-0.074902	0.158314	12.4016	0.0291817	0.755799	5.62263	-0.0152635	0.530062	2.12887	0.25968	-4.17787
chr2L	19270000	19280000	-0.0901785	0.106436	12.3597	0.0792284	0.352959	5.88738	-0.0173297	0.522911	1.28212	0.563981	-4.12063
chr2L	19280000	19290000	-0.101168	0.04637	12.417	0.164394	0.0633334	5.88371	-0.0152635	0.523136	-1.88653	1	-4.68158
chr2L	19290000	19300000	-0.0745552	0.184231	12.4154	0.109507	0.209799	5.90535	-0.0174971	0.507933	-1.16248	0.469302	-3.09058
chr2L	19300000	19310000	-0.0815053	0.101886	12.5045	0.133354	0.110532	6.02209	-0.0152635	0.523136	1.9895	0.162211	-3.17692
chr2L	19310000	19320000	-0.0915804	0.0763185	12.4207	0.225827	0.0066113	6.10218	-0.0201507	0.400521	0	-1	0
chr2L	19320000	19330000	-0.0858577	0.109196	12.5016	0.343015	0.00510524	6.9021	-0.0260604	0.283607	2.55234	0.279476	-4.08797
chr2L	19330000	19340000	-0.0585154	0.29942	12.3494	0.00679767	0.938924	5.77692	-0.0260604	0.283607	-0.0904751	0.826962	7.5559
chr2L	19340000	19350000	0.189298	0.000224723	12.4595	-0.269296	0.00742684	6.38416	-0.0276409	0.266562	-0.322668	0.448381	6.23892
chr2L	19350000	19360000	0.389652	1.59e-09	12.25	-0.809829	1.81e-20	6.00366	-0.0276409	0.268012	-0.366872	0.388383	4.95666
chr2L	19360000	19370000	-0.140449	0.00548069	12.4709	0.211826	0.069968	6.69295	-0.0276409	0.268012	-1.05053	0.286148	-2.61381
chr2L	19370000	19380000	-0.130306	0.00501993	12.5165	0.0639328	0.453039	5.94973	-0.0227565	0.367052	0.793344	0.672302	-2.9348
chr2L	19380000	19390000	-0.0622383	0.193283	12.545	0.133752	0.100864	6.05823	-0.0227565	0.367052	-2.36855	0.01157	3.83911
chr2L	19390000	19400000	-0.0715995	0.116712	12.5018	0.201818	0.0784049	6.54746	-0.0111219	0.457617	-0.914248	0.27563	-1.84201
chr2L	19400000	19410000	-0.0342126	0.547609	12.4482	0.0777877	0.427462	5.64133	-0.0110313	0.457617	-4.49285	0.048967	-4.05387
chr2L	19410000	19420000	-0.00787244	0.899271	12.3754	0.0644861	0.483406	5.896	-0.000476017	0.457617	0.154547	0.74007	3.55517
chr2L	19420000	19430000	-0.0904366	0.0731525	12.5292	0.240815	0.0214974	6.40009	0.00399691	0.457617	0.154547	0.74007	3.55517
chr2L	19430000	19440000	-0.113791	0.0692785	12.5774	0.317483	0.0049122	6.49135	0.00736271	0.457617	0.683635	0.227576	3.01166
chr2L	19440000	19450000	-0.133781	0.0258916	12.5785	0.22402	0.0429673	6.52866	0.0140753	0.457617	0.828394	0.070802	6.28107
chr2L	19450000	19460000	-0.0434565	0.37075	12.5295	0.187687	0.0551558	6.38459	0.0252157	0.372304	-0.746496	0.199802	1.92819
chr2L	19460000	19470000	-0.0879024	0.0892663	12.4945	0.120415	0.168458	5.80878	0.0270371	0.372304	3.96675	0.015846	0.723593
chr2L	19470000	19480000	-0.0696273	0.19997	12.4902	-0.0177452	0.851556	5.70341	0.0270371	0.396263	1.25788	0.698671	-4.39584
chr2L	19480000	19490000	-0.0450893	0.416488	12.5882	0.0894529	0.288653	5.99972	0.0270371	0.390543	6.0581	0.00026	0.901015
chr2L	19490000	19500000	-0.138167	0.0262556	12.5812	0.0985161	0.353341	6.41461	0.0270371	0.390543	1.2998	0.065797	-0.877015
chr2L	19500000	19510000	-0.156327	0.0340156	12.6059	0.262537	0.00137418	6.17209	0.0270371	0.390543	-4.00652	8e-05	0.222691
chr2L	19510000	19520000	-0.0699439	0.341353	12.6402	0.214947	0.00809783	6.08447	0.0213301	0.491246	-4.00652	8e-05	0.222691
chr2L	19520000	19530000	-0.212229	0.00280938	12.6546	0.210667	0.00954788	6.10955	0.0173001	0.551796	0.849676	0.076822	4.00422
chr2L	19530000	19540000	-0.11662	0.0175265	12.5025	0.325674	6.15e-05	6.2923	0.0173001	0.551796	2.17153	0.001294	2.5086
chr2L	19540000	19550000	0.013436	0.806764	12.5327	0.171329	0.120029	6.49573	0.0169672	0.551796	3.06141	0.0023	-1.92442
chr2L	19550000	19560000	-0.00650714	0.920002	12.342	0.0820642	0.334311	5.714	0.0123035	0.631956	0.821333	0.299088	5.66471
chr2L	19560000	19570000	-0.0252632	0.668291	12.5331	-0.0134464	0.883649	5.86513	0.00940332	0.697862	1.47792	0.02991	2.26627
chr2L	19570000	19580000	-0.28033	0.000215286	12.7081	0.34489	0.00745636	7.43218	0.00683212	0.727636	0.993872	0.042179	8.01896
chr2L	19580000	19590000	-0.113086	0.111406	12.63	0.232678	0.0423384	6.59361	0.00535948	0.83294	0.382458	0.3975	4.32554
chr2L	19590000	19600000	-0.0417369	0.391886	12.5177	-0.0258258	0.797967	5.58934	0.00535948	0.762591	0.146537	0.82222	0.370644
chr2L	19600000	19610000	0.0378569	0.468817	12.3662	-0.0742583	0.544872	5.45147	0.00535948	0.762591	0.171866	0.718411	3.37968
chr2L	19610000	19620000	-0.0021873	0.975579	12.4603	-0.0410714	0.701676	5.55268	0.0129051	0.677783	0.171866	0.718411	3.37968
chr2L	19620000	19630000	-0.107128	0.0305257	12.5196	0.0341482	0.691305	5.73549	0.0129051	0.679326	-0.495168	0.432089	2.00601
chr2L	19630000	19640000	-0.0811336	0.130587	12.5758	0.0965888	0.355986	5.58191	0.00238611	0.709121	0	-1	0
chr2L	19640000	19650000	-0.150553	0.00475103	12.4493	0.0715917	0.435675	5.63377	0.00238611	0.749493	-0.222179	0.742478	0.696147
chr2L	19650000	19660000	0.346326	1.17e-07	12.2985	-0.936097	2.32e-23	6.04781	0.0108426	0.587633	0.735917	0.176546	3.14077
chr2L	19660000	19670000	0.560965	4.97e-27	12.3834	-1.08114	8.46e-29	6.11857	0.0200525	0.507509	-0.715243	0.198516	2.95999
chr2L	19670000	19680000	0.195073	0.000131731	12.3875	-0.53952	3.81e-09	5.7473	0.0244468	0.44196	0.568938	0.238179	3.01908
chr2L	19680000	19690000	-0.100063	0.0315571	12.4921	-0.0164494	0.88357	5.56208	0.0296546	0.354702	-0.547859	0.473963	-0.533728
chr2L	19690000	19700000	-0.05411	0.296455	12.5333	0.12892	0.135191	5.68229	0.0405602	0.228914	-0.0627966	0.879238	8.37267
chr2L	19700000	19710000	0.277011	4.22e-05	12.3313	-1.3716	1.67e-41	5.96794	0.0427654	0.174576	0.177931	0.669061	7.115
chr2L	19710000	19720000	0.081298	0.149891	12.377	-0.39686	6.08e-06	5.8366	0.0427654	0.174576	0.177931	0.669061	7.115
chr2L	19720000	19730000	-0.0244762	0.639692	12.4944	0.0735854	0.40625	5.70167	0.0467636	0.132441	1.06683	0.058911	5.13914
chr2L	19730000	19740000	0.267633	1.15e-05	12.597	-0.357202	3.67e-05	6.10574	0.0467636	0.132441	1.06683	0.058911	5.13914
chr2L	19740000	19750000	0.0377451	0.614357	12.6942	0.0834872	0.322241	6.12887	0.0467636	0.132441	-0.940268	0.635327	-3.92723
chr2L	19750000	19760000	-0.180088	0.0147232	12.6987	0.245814	0.00288819	6.30289	0.0427654	0.142432	0.351466	0.444812	3.55953
chr2L	19760000	19770000	0.00678433	0.893047	12.4971	0.237139	0.00320599	6.13229	0.0364103	0.211972	0.709266	0.123689	4.11624
chr2L	19770000	19780000	-0.0270375	0.593311	12.4082	0.109332	0.256178	5.63426	0.0323615	0.261602	4.0031	0.165636	-4.2455
chr2L	19780000	19790000	-0.116209	0.0364633	12.5869	0.177124	0.0286039	6.01648	0.0264087	0.329831	0.154885	0.709777	6.34555
chr2L	19790000	19800000	0.0342028	0.495523	12.5538	0.162837	0.0430176	6.2168	0.00978767	0.418952	1.38724	0.014042	5.34608
chr2L	19800000	19810000	-0.00999493	0.847711	12.4788	0.00480608	0.956534	5.71418	-0.00268958	0.568895	-0.743265	0.229534	2.29518
chr2L	19810000	19820000	0.148243	0.0380259	12.1382	-0.348159	0.281957	4.99998	-0.00488589	0.568895	-1.52346	0.041302	0.232865
chr2L	19820000	19830000	-0.0758331	0.219155	12.5236	0.0017286	0.98597	5.6168	-0.00905463	0.568895	-0.702697	0.173773	4.61144
chr2L	19830000	19840000	-0.0999277	0.0367943	12.4565	0.0608236	0.567263	5.50919	-0.0120006	0.568895	-0.702697	0.173773	4.61144
chr2L	19840000	19850000	-0.142287	0.00414998	12.4676	0.0238235	0.799944	5.65021	-0.0189271	0.525777	-0.702697	0.173773	4.61144
chr2L	19850000	19860000	-0.114906	0.041428	12.4563	-0.0679639	0.576213	5.47542	-0.0261885	0.369155	-0.702697	0.173773	4.61144
chr2L	19860000	19870000	-0.0515339	0.28356	12.5142	0.209781	0.0496549	6.4495	-0.0310746	0.298957	-0.702697	0.173773	4.61144
chr2L	19870000	19880000	-0.00528149	0.923425	12.4642	0.056349	0.515867	5.96249	-0.0381706	0.201307	-0.702697	0.173773	4.61144
chr2L	19880000	19890000	-0.116089	0.0664673	12.5451	0.150172	0.0622364	6.09931	-0.0422386	0.136098	-0.702697	0.173773	4.61144
chr2L	19890000	19900000	-0.0915429	0.0709883	12.5509	0.110598	0.187572	6.00216	-0.0456643	0.103419	-0.854289	0.203799	1.10861
chr2L	19900000	19910000	-0.125359	0.0231898	12.4476	0.401958	1.12e-06	6.30189	-0.0501674	0.0980325	0.506416	0.295865	3.80183
chr2L	19910000	19920000	-0.0359015	0.563631	12.3302	0.198559	0.0121848	6.207	-0.0501674	0.0919835	0.506416	0.295865	3.80183
chr2L	19920000	19930000	-0.109657	0.0601379	12.5507	0.0933314	0.319233	5.73432	-0.0501674	0.0919835	-0.744931	0.447356	-1.62214
chr2L	19930000	19940000	-0.165842	0.000959302	12.5583	0.188537	0.0213313	6.03753	-0.0501674	0.0919835	-0.0353848	0.934795	4.59716
chr2L	19940000	19950000	-0.117192	0.0406752	12.5921	0.288881	0.0117586	6.6792	-0.0464107	0.0919835	-0.0353848	0.934795	4.59716
chr2L	19950000	19960000	-0.169826	0.00110573	12.5546	0.245147	0.00246012	6.25678	-0.0438005	0.0919835	0.222964	0.612013	4.42911
chr2L	19960000	19970000	-0.0150796	0.802778	12.4479	0.0186495	0.830691	5.8429	-0.0380432	0.147337	1.66626	0.095755	-2.76142
chr2L	19970000	19980000	-0.148048	0.00635075	12.5732	-0.0270911	0.782751	5.742	-0.0289101	0.240119	0.302652	0.534164	3.14615
[truncated: 13,852 more rows]
